# Supplementary material for: Rapid expansion and international spread of M1UK in the post-pandemic upsurge of Streptococcus pyogenes infections in United Kingdom
Source: Research Square preprint supplement (doi:10.21203/rs.3.rs-3842890/v1), 2024-01-18
Supplement: Supplementary file 1 [file 176685771039b66b24b15821.xlsx]

## Sheet: Supplementary Data 1
Supplementary Data 1. – Distribution of indels within 1741 M1UK and M1global strains analysed
Location of Indels*	Indel present in M1UK**	Indel present in M1global**
1630160	1551/1552	nil
129460	1550/1552	2/189
343279	1551/1552	nil
76208	1550/1552	nil
*Indels are those described in Lee et al6. In that dataset6, 76208 and 343279 were present in all M1UK strains bar one exception; 129460 was additionally present in 1 M1global strain; 1630160 was additionally present in 3 M1global strains and missing in 1 M1UK strain. Location of indels based on MGAS5005 (CP000017.2)
** Total number of strains analysed n=1741; intermediate strains were not considered in this analysis.

## Sheet: Supplementary Data 2
Supplementary Data 2. – Frequency of antibiotic resistance genes and mutations in pbp genes in 1815 emm1 strains analysed
	AMR gene presence			PBP point mutations
Gene	mefA/	tetM	dfrC	pbp1A					pbp1b			pbp2A					pbp2x
	msrD
Presence of gene	Present	Present	Present	T535I	A394T	R417K	A136T	T397A	F56L	A153V	L666I	S355F	A570V	L291H	A529V	A328V	G600D	T386A	R692C
or non-synonymous mutation
No. of strains	2	6	1	4	1	1	1	1	12	3	2	1	2	1	2	7	3	1	1

## Sheet: Supplementary Data 3
Supplementary Data 3.- Metadata and genome accession numbers of M1 GAS genome sequences used in this study
Strain_name	M1_genotype	Specimen*	Year	Country	Accession nr	Project	Used in Dataset	References**
gas100429	M1UK	Pleural fluid	2015	UK	ERR12370764	PRJEB68199	Dataset 1, 2 and 3	previously sequenced at UKHSA
gas107860	M1Global	Throat swab	2014	UK	ERR12370765	PRJEB68199	Dataset 1 and 2	previously sequenced at UKHSA
gas114575	M1UK	Blood culture	2015	UK	ERR12370766	PRJEB68199	Dataset 1, 2 and 3	previously sequenced at UKHSA
gas114579	M1UK	Blood culture	2015	UK	ERR12370767	PRJEB68199	Dataset 1, 2 and 3	previously sequenced at UKHSA
gas114580	M1UK	Throat swab	2015	UK	ERR12370768	PRJEB68199	Dataset 1, 2 and 3	previously sequenced at UKHSA
gas114584	M1UK	Blood culture	2015	UK	ERR12370769	PRJEB68199	Dataset 1, 2 and 3	previously sequenced at UKHSA
gas114589	M1UK	Information not provided	2015	UK	ERR12370770	PRJEB68199	Dataset 1, 2 and 3	previously sequenced at UKHSA
gas114599	M1UK	Blood culture	2015	UK	ERR12370771	PRJEB68199	Dataset 1, 2 and 3	previously sequenced at UKHSA
gas114600	M1UK	Blood culture	2015	UK	ERR12370772	PRJEB68199	Dataset 1, 2 and 3	previously sequenced at UKHSA
gas114604	M1UK	Throat swab	2015	UK	ERR12370773	PRJEB68199	Dataset 1, 2 and 3	previously sequenced at UKHSA
gas114609	M1UK	Blood culture	2015	UK	ERR12370774	PRJEB68199	Dataset 1, 2 and 3	previously sequenced at UKHSA
gas114612	M1UK	Pleural fluid	2015	UK	ERR12370775	PRJEB68199	Dataset 1, 2 and 3	previously sequenced at UKHSA
gas114620	M1UK	Blood culture	2015	UK	ERR12370776	PRJEB68199	Dataset 1, 2 and 3	previously sequenced at UKHSA
gas114621	M1UK	Throat swab	2015	UK	ERR12370777	PRJEB68199	Dataset 1, 2 and 3	previously sequenced at UKHSA
gas114629	M1UK	Blood culture	2015	UK	ERR12370778	PRJEB68199	Dataset 1, 2 and 3	previously sequenced at UKHSA
gas114630	M1UK	Blood culture	2015	UK	ERR12370779	PRJEB68199	Dataset 1, 2 and 3	previously sequenced at UKHSA
gas114641	M1UK	Throat swab	2015	UK	ERR12370780	PRJEB68199	Dataset 1, 2 and 3	previously sequenced at UKHSA
gas114643	M1UK	Blood culture	2015	UK	ERR12370781	PRJEB68199	Dataset 1, 2 and 3	previously sequenced at UKHSA
gas114662	M1UK	Blood culture	2015	UK	ERR12370782	PRJEB68199	Dataset 1, 2 and 3	previously sequenced at UKHSA
gas114667	M1UK	Blood culture	2015	UK	ERR12370783	PRJEB68199	Dataset 1, 2 and 3	previously sequenced at UKHSA
gas114678	M1UK	Joint	2015	UK	ERR12370784	PRJEB68199	Dataset 1, 2 and 3	previously sequenced at UKHSA
gas114686	M1Global	Right hip	2015	UK	ERR12370785	PRJEB68199	Dataset 1 and 2	previously sequenced at UKHSA
gas114688	13SNPs	Blood culture	2015	UK	ERR12370786	PRJEB68199	Dataset 1, 2 and 3	previously sequenced at UKHSA
gas114692	M1Global	Tissue	2015	UK	ERR12370787	PRJEB68199	Dataset 1 and 2	previously sequenced at UKHSA
gas114693	M1Global	Fluid	2015	UK	ERR12370788	PRJEB68199	Dataset 1 and 2	previously sequenced at UKHSA
gas114694	M1UK	Throat swab	2015	UK	ERR12370789	PRJEB68199	Dataset 1, 2 and 3	previously sequenced at UKHSA
gas114699	M1UK	Blood culture	2015	UK	ERR12370790	PRJEB68199	Dataset 1, 2 and 3	previously sequenced at UKHSA
gas114700	M1Global	Information not provided	2015	UK	ERR12370791	PRJEB68199	Dataset 1 and 2	previously sequenced at UKHSA
gas114703	M1UK	Blood culture	2015	UK	ERR12370792	PRJEB68199	Dataset 1, 2 and 3	previously sequenced at UKHSA
gas114704	M1UK	Blood culture	2015	UK	ERR12370793	PRJEB68199	Dataset 1, 2 and 3	previously sequenced at UKHSA
gas114705	M1UK	Tissue	2015	UK	ERR12370794	PRJEB68199	Dataset 1, 2 and 3	previously sequenced at UKHSA
gas114706	M1UK	Tissue	2015	UK	ERR12370795	PRJEB68199	Dataset 1, 2 and 3	previously sequenced at UKHSA
gas114711	M1UK	Blood culture	2015	UK	ERR12370796	PRJEB68199	Dataset 1, 2 and 3	previously sequenced at UKHSA
gas114715	M1UK	Wound swab	2015	UK	ERR12370797	PRJEB68199	Dataset 1, 2 and 3	previously sequenced at UKHSA
gas114716	M1UK	Ear swab	2015	UK	ERR12370798	PRJEB68199	Dataset 1, 2 and 3	previously sequenced at UKHSA
gas114723	M1UK	Blood culture	2015	UK	ERR12370799	PRJEB68199	Dataset 1, 2 and 3	previously sequenced at UKHSA
gas114727	M1UK	Tissue	2015	UK	ERR12370800	PRJEB68199	Dataset 1, 2 and 3	previously sequenced at UKHSA
gas114729	M1UK	Blood culture	2015	UK	ERR12370801	PRJEB68199	Dataset 1, 2 and 3	previously sequenced at UKHSA
gas115299	M1UK	Blood culture	2015	UK	ERR12370802	PRJEB68199	Dataset 1, 2 and 3	previously sequenced at UKHSA
gas115308	M1UK	Wound swab	2015	UK	ERR12370803	PRJEB68199	Dataset 1, 2 and 3	previously sequenced at UKHSA
gas115318	M1UK	Blood culture	2015	UK	ERR12370804	PRJEB68199	Dataset 1, 2 and 3	previously sequenced at UKHSA
gas115325	M1UK	Blood culture	2015	UK	ERR12370805	PRJEB68199	Dataset 1, 2 and 3	previously sequenced at UKHSA
gas115326	M1UK	Throat swab	2015	UK	ERR12370806	PRJEB68199	Dataset 1, 2 and 3	previously sequenced at UKHSA
gas115328	M1UK	Tissue	2015	UK	ERR12370807	PRJEB68199	Dataset 1, 2 and 3	previously sequenced at UKHSA
gas115334	M1UK	Throat swab	2015	UK	ERR12370808	PRJEB68199	Dataset 1, 2 and 3	previously sequenced at UKHSA
gas115335	M1UK	Sputum	2015	UK	ERR12370809	PRJEB68199	Dataset 1, 2 and 3	previously sequenced at UKHSA
gas115337	M1UK	Blood culture	2015	UK	ERR12370810	PRJEB68199	Dataset 1, 2 and 3	previously sequenced at UKHSA
gas115339	M1UK	Tissue	2015	UK	ERR12370811	PRJEB68199	Dataset 1, 2 and 3	previously sequenced at UKHSA
gas115340	M1UK	Information not provided	2015	UK	ERR12370812	PRJEB68199	Dataset 1, 2 and 3	previously sequenced at UKHSA
gas115347	M1UK	Information not provided	2015	UK	ERR12370813	PRJEB68199	Dataset 1, 2 and 3	previously sequenced at UKHSA
gas115348	M1UK	Blood culture	2015	UK	ERR12370814	PRJEB68199	Dataset 1, 2 and 3	previously sequenced at UKHSA
gas115352	M1UK	Blood culture	2015	UK	ERR12370815	PRJEB68199	Dataset 1, 2 and 3	previously sequenced at UKHSA
gas115353	M1Global	Blood culture	2015	UK	ERR12370816	PRJEB68199	Dataset 1 and 2	previously sequenced at UKHSA
gas115356	M1UK	Blood culture	2015	UK	ERR12370817	PRJEB68199	Dataset 1, 2 and 3	previously sequenced at UKHSA
gas115358	M1UK	Ear swab	2015	UK	ERR12370818	PRJEB68199	Dataset 1, 2 and 3	previously sequenced at UKHSA
gas115360	M1UK	Blood culture	2015	UK	ERR12370819	PRJEB68199	Dataset 1, 2 and 3	previously sequenced at UKHSA
gas115361	M1UK	Ear swab	2015	UK	ERR12370820	PRJEB68199	Dataset 1, 2 and 3	previously sequenced at UKHSA
gas115368	M1Global	Tissue	2015	UK	ERR12370821	PRJEB68199	Dataset 1 and 2	previously sequenced at UKHSA
gas115369	M1UK	Blood culture	2015	UK	ERR12370822	PRJEB68199	Dataset 1, 2 and 3	previously sequenced at UKHSA
gas115372	M1UK	Blood culture	2015	UK	ERR12370823	PRJEB68199	Dataset 1, 2 and 3	previously sequenced at UKHSA
gas117602	M1UK	Sputum	2015	UK	ERR12370824	PRJEB68199	Dataset 1, 2 and 3	previously sequenced at UKHSA
gas117604	M1UK	Blood culture	2015	UK	ERR12370825	PRJEB68199	Dataset 1, 2 and 3	previously sequenced at UKHSA
gas117615	M1Global	Blood culture	2015	UK	ERR12370826	PRJEB68199	Dataset 1 and 2	previously sequenced at UKHSA
gas117617	M1UK	Blood culture	2015	UK	ERR12370827	PRJEB68199	Dataset 1, 2 and 3	previously sequenced at UKHSA
gas117622	M1UK	Blood culture	2015	UK	ERR12370828	PRJEB68199	Dataset 1, 2 and 3	previously sequenced at UKHSA
gas117623	M1UK	Throat swab	2015	UK	ERR12370829	PRJEB68199	Dataset 1, 2 and 3	previously sequenced at UKHSA
gas117624	M1UK	Sputum	2015	UK	ERR12370830	PRJEB68199	Dataset 1, 2 and 3	previously sequenced at UKHSA
gas117639	M1Global	Blood culture	2015	UK	ERR12370831	PRJEB68199	Dataset 1 and 2	previously sequenced at UKHSA
gas117645	13SNPs	Blood culture	2015	UK	ERR12370832	PRJEB68199	Dataset 1, 2 and 3	previously sequenced at UKHSA
gas117646	23SNPs	Blood culture	2015	UK	ERR12370833	PRJEB68199	Dataset 1, 2 and 3	previously sequenced at UKHSA
gas117649	M1Global	Blood culture	2015	UK	ERR12370834	PRJEB68199	Dataset 1 and 2	previously sequenced at UKHSA
gas117673	M1UK	Blood culture	2015	UK	ERR12370835	PRJEB68199	Dataset 1, 2 and 3	previously sequenced at UKHSA
gas117676	M1Global	Throat swab	2015	UK	ERR12370836	PRJEB68199	Dataset 1 and 2	previously sequenced at UKHSA
gas117678	M1UK	Blood culture	2015	UK	ERR12370837	PRJEB68199	Dataset 1, 2 and 3	previously sequenced at UKHSA
gas117685	M1UK	Blood culture	2015	UK	ERR12370838	PRJEB68199	Dataset 1, 2 and 3	previously sequenced at UKHSA
gas117687	M1UK	Information not provided	2015	UK	ERR12370839	PRJEB68199	Dataset 1, 2 and 3	previously sequenced at UKHSA
gas117688	M1UK	Aspirate	2015	UK	ERR12370840	PRJEB68199	Dataset 1, 2 and 3	previously sequenced at UKHSA
gas118178	M1UK	Blood culture	2015	UK	ERR12370841	PRJEB68199	Dataset 1, 2 and 3	previously sequenced at UKHSA
gas118179	M1UK	Blood culture	2015	UK	ERR12370842	PRJEB68199	Dataset 1, 2 and 3	previously sequenced at UKHSA
gas118180	M1UK	Vaginal swab	2015	UK	ERR12370843	PRJEB68199	Dataset 1, 2 and 3	previously sequenced at UKHSA
gas118181	M1UK	Swab	2015	UK	ERR12370844	PRJEB68199	Dataset 1, 2 and 3	previously sequenced at UKHSA
gas118196	M1Global	Sputum	2015	UK	ERR12370845	PRJEB68199	Dataset 1 and 2	previously sequenced at UKHSA
gas118199	M1UK	Blood culture	2015	UK	ERR12370846	PRJEB68199	Dataset 1, 2 and 3	previously sequenced at UKHSA
gas118201	M1UK	Information not provided	2015	UK	ERR12370847	PRJEB68199	Dataset 1, 2 and 3	previously sequenced at UKHSA
gas118203	M1UK	Information not provided	2015	UK	ERR12370848	PRJEB68199	Dataset 1, 2 and 3	previously sequenced at UKHSA
gas118208	M1UK	Blood culture	2015	UK	ERR12370849	PRJEB68199	Dataset 1, 2 and 3	previously sequenced at UKHSA
gas118216	23SNPs	Blood culture	2015	UK	ERR12370850	PRJEB68199	Dataset 1, 2 and 3	previously sequenced at UKHSA
gas118227	M1UK	Blood culture	2015	UK	ERR12370851	PRJEB68199	Dataset 1, 2 and 3	previously sequenced at UKHSA
gas118236	M1UK	Blood culture	2015	UK	ERR12370852	PRJEB68199	Dataset 1, 2 and 3	previously sequenced at UKHSA
gas118238	M1UK	Blood culture	2015	UK	ERR12370853	PRJEB68199	Dataset 1, 2 and 3	previously sequenced at UKHSA
gas118240	M1UK	Information not provided	2015	UK	ERR12370854	PRJEB68199	Dataset 1, 2 and 3	previously sequenced at UKHSA
gas118246	M1UK	Blood culture	2015	UK	ERR12370855	PRJEB68199	Dataset 1, 2 and 3	previously sequenced at UKHSA
gas12036	M1Global	Blood culture	2014	UK	ERR12370856	PRJEB68199	Dataset 1 and 2	previously sequenced at UKHSA
gas12040	M1UK	Throat swab	2014	UK	ERR12370857	PRJEB68199	Dataset 1, 2 and 3	previously sequenced at UKHSA
gas12041	M1UK	Blood culture	2014	UK	ERR12370858	PRJEB68199	Dataset 1, 2 and 3	previously sequenced at UKHSA
gas12042	M1UK	Blood culture	2014	UK	ERR12370859	PRJEB68199	Dataset 1, 2 and 3	previously sequenced at UKHSA
gas12043	M1UK	Blood culture	2014	UK	ERR12370860	PRJEB68199	Dataset 1, 2 and 3	previously sequenced at UKHSA
gas12047	M1UK	Blood culture	2014	UK	ERR12370861	PRJEB68199	Dataset 1, 2 and 3	previously sequenced at UKHSA
gas12061	M1UK	Blood culture	2014	UK	ERR12370862	PRJEB68199	Dataset 1, 2 and 3	previously sequenced at UKHSA
gas12073	M1UK	Throat swab	2014	UK	ERR12370863	PRJEB68199	Dataset 1, 2 and 3	previously sequenced at UKHSA
gas12078	M1UK	Nose	2014	UK	ERR12370864	PRJEB68199	Dataset 1, 2 and 3	previously sequenced at UKHSA
gas12079	M1UK	Blood culture	2014	UK	ERR12370865	PRJEB68199	Dataset 1, 2 and 3	previously sequenced at UKHSA
gas12081	M1UK	Throat swab	2014	UK	ERR12370866	PRJEB68199	Dataset 1, 2 and 3	previously sequenced at UKHSA
gas12082	M1Global	Throat swab	2014	UK	ERR12370867	PRJEB68199	Dataset 1 and 2	previously sequenced at UKHSA
gas12085	M1UK	Throat swab	2014	UK	ERR12370868	PRJEB68199	Dataset 1, 2 and 3	previously sequenced at UKHSA
gas12092	M1UK	Blood culture	2014	UK	ERR12370869	PRJEB68199	Dataset 1, 2 and 3	previously sequenced at UKHSA
gas12101	M1UK	Biopsy from lung	2014	UK	ERR12370870	PRJEB68199	Dataset 1, 2 and 3	previously sequenced at UKHSA
gas124810	M1UK	Blood culture	2015	UK	ERR12370871	PRJEB68199	Dataset 1, 2 and 3	previously sequenced at UKHSA
gas124811	M1UK	Blood culture	2015	UK	ERR12370872	PRJEB68199	Dataset 1, 2 and 3	previously sequenced at UKHSA
gas124812	M1UK	Throat swab	2015	UK	ERR12370873	PRJEB68199	Dataset 1, 2 and 3	previously sequenced at UKHSA
gas124814	M1UK	Low vaginal swab	2015	UK	ERR12370874	PRJEB68199	Dataset 1, 2 and 3	previously sequenced at UKHSA
gas124815	M1UK	Throat swab	2015	UK	ERR12370875	PRJEB68199	Dataset 1, 2 and 3	previously sequenced at UKHSA
gas124824	M1UK	Aspirate	2015	UK	ERR12370876	PRJEB68199	Dataset 1, 2 and 3	previously sequenced at UKHSA
gas124826	M1UK	Blood culture	2015	UK	ERR12370877	PRJEB68199	Dataset 1, 2 and 3	previously sequenced at UKHSA
gas124830	M1UK	Blood culture	2015	UK	ERR12370878	PRJEB68199	Dataset 1, 2 and 3	previously sequenced at UKHSA
gas124831	M1UK	Blood culture	2015	UK	ERR12370879	PRJEB68199	Dataset 1, 2 and 3	previously sequenced at UKHSA
gas124836	M1UK	Throat swab	2015	UK	ERR12370880	PRJEB68199	Dataset 1, 2 and 3	previously sequenced at UKHSA
gas124840	M1UK	Tissue	2015	UK	ERR12370881	PRJEB68199	Dataset 1, 2 and 3	previously sequenced at UKHSA
gas124842	M1UK	Blood culture	2015	UK	ERR12370882	PRJEB68199	Dataset 1, 2 and 3	previously sequenced at UKHSA
gas124848	M1UK	Blood culture	2015	UK	ERR12370883	PRJEB68199	Dataset 1, 2 and 3	previously sequenced at UKHSA
gas124863	M1UK	Blood culture	2015	UK	ERR12370884	PRJEB68199	Dataset 1, 2 and 3	previously sequenced at UKHSA
gas124870	M1UK	Blood	2015	UK	ERR12370885	PRJEB68199	Dataset 1, 2 and 3	previously sequenced at UKHSA
gas12732	M1Global	Wound swab	2014	UK	ERR12370886	PRJEB68199	Dataset 1 and 2	previously sequenced at UKHSA
gas12734	M1UK	Blood culture	2014	UK	ERR12370887	PRJEB68199	Dataset 1, 2 and 3	previously sequenced at UKHSA
gas12738	M1UK	Blood culture	2014	UK	ERR12370888	PRJEB68199	Dataset 1, 2 and 3	previously sequenced at UKHSA
gas12740	M1Global	Pleural fluid	2014	UK	ERR12370889	PRJEB68199	Dataset 1 and 2	previously sequenced at UKHSA
gas12747	M1UK	Blood culture	2014	UK	ERR12370890	PRJEB68199	Dataset 1, 2 and 3	previously sequenced at UKHSA
gas12755	M1UK	Tissue	2014	UK	ERR12370891	PRJEB68199	Dataset 1, 2 and 3	previously sequenced at UKHSA
gas12773	M1Global	Pleural fluid	2014	UK	ERR12370986	PRJEB68199	Dataset 1 and 2	previously sequenced at UKHSA
gas12776	M1UK	Joint	2014	UK	ERR12370987	PRJEB68199	Dataset 1, 2 and 3	previously sequenced at UKHSA
gas12777	M1UK	Wound drain	2014	UK	ERR12370988	PRJEB68199	Dataset 1, 2 and 3	previously sequenced at UKHSA
gas12781	M1Global	Blood culture	2014	UK	ERR12370989	PRJEB68199	Dataset 1 and 2	previously sequenced at UKHSA
gas12784	M1UK	Other	2014	UK	ERR12370990	PRJEB68199	Dataset 1, 2 and 3	previously sequenced at UKHSA
gas12793	23SNPs	Blood culture	2013	UK	ERR12370991	PRJEB68199	Dataset 1, 2 and 3	previously sequenced at UKHSA
gas12802	M1UK	Blood culture	2014	UK	ERR12370992	PRJEB68199	Dataset 1, 2 and 3	previously sequenced at UKHSA
gas12803	M1Global	Blood culture	2014	UK	ERR12370993	PRJEB68199	Dataset 1 and 2	previously sequenced at UKHSA
gas12806	M1UK	Throat swab	2014	UK	ERR12370994	PRJEB68199	Dataset 1, 2 and 3	previously sequenced at UKHSA
gas12813	M1Global	Blood culture	2014	UK	ERR12370995	PRJEB68199	Dataset 1 and 2	previously sequenced at UKHSA
gas12835	M1UK	Throat swab	2014	UK	ERR12370996	PRJEB68199	Dataset 1, 2 and 3	previously sequenced at UKHSA
gas12848	M1UK	Blood culture	2014	UK	ERR12370997	PRJEB68199	Dataset 1, 2 and 3	previously sequenced at UKHSA
gas12863	M1UK	Throat swab	2014	UK	ERR12370998	PRJEB68199	Dataset 1, 2 and 3	previously sequenced at UKHSA
gas12871	M1UK	Throat swab	2014	UK	ERR12370999	PRJEB68199	Dataset 1, 2 and 3	previously sequenced at UKHSA
gas12876	M1UK	Throat swab	2014	UK	ERR12371000	PRJEB68199	Dataset 1, 2 and 3	previously sequenced at UKHSA
gas12886	M1UK	Throat swab	2014	UK	ERR12371001	PRJEB68199	Dataset 1, 2 and 3	previously sequenced at UKHSA
gas12891	M1UK	Throat swab	2014	UK	ERR12371002	PRJEB68199	Dataset 1, 2 and 3	previously sequenced at UKHSA
gas129448	M1UK	Blood culture	2015	UK	ERR12371003	PRJEB68199	Dataset 1, 2 and 3	previously sequenced at UKHSA
gas129458	M1Global	Blood culture	2015	UK	ERR12371004	PRJEB68199	Dataset 1 and 2	previously sequenced at UKHSA
gas129467	M1UK	Blood culture	2015	UK	ERR12371005	PRJEB68199	Dataset 1, 2 and 3	previously sequenced at UKHSA
gas129469	M1UK	Blood culture	2015	UK	ERR12371006	PRJEB68199	Dataset 1, 2 and 3	previously sequenced at UKHSA
gas136696	23SNPs	Blood culture	2013	UK	ERR12371007	PRJEB68199	Dataset 1, 2 and 3	previously sequenced at UKHSA
gas138346	M1Global	Other	2014	UK	ERR12371008	PRJEB68199	Dataset 1 and 2	previously sequenced at UKHSA
gas18602	M1UK	Blood culture	2014	UK	ERR12372105	PRJEB68199	Dataset 1, 2 and 3	previously sequenced at UKHSA
gas18604	M1UK	Throat swab	2014	UK	ERR12372106	PRJEB68199	Dataset 1, 2 and 3	previously sequenced at UKHSA
gas18617	M1UK	Throat swab	2014	UK	ERR12372107	PRJEB68199	Dataset 1, 2 and 3	previously sequenced at UKHSA
gas18618	M1UK	Throat swab	2014	UK	ERR12372108	PRJEB68199	Dataset 1, 2 and 3	previously sequenced at UKHSA
gas18883	M1UK	Blood culture	2014	UK	ERR12372109	PRJEB68199	Dataset 1, 2 and 3	previously sequenced at UKHSA
gas18884	M1Global	Throat swab	2014	UK	ERR12372110	PRJEB68199	Dataset 1 and 2	previously sequenced at UKHSA
gas18890	M1UK	Peritoneal fl	2014	UK	ERR12372111	PRJEB68199	Dataset 1, 2 and 3	previously sequenced at UKHSA
gas18891	M1UK	Blood culture	2014	UK	ERR12372112	PRJEB68199	Dataset 1, 2 and 3	previously sequenced at UKHSA
gas18893	M1UK	Blood culture	2014	UK	ERR12372113	PRJEB68199	Dataset 1, 2 and 3	previously sequenced at UKHSA
gas18905	23SNPs	Information not provided	2014	UK	ERR12372114	PRJEB68199	Dataset 1, 2 and 3	previously sequenced at UKHSA
gas18911	23SNPs	Information not provided	2014	UK	ERR12372115	PRJEB68199	Dataset 1, 2 and 3	previously sequenced at UKHSA
gas18936	M1UK	Throat swab	2014	UK	ERR12372116	PRJEB68199	Dataset 1, 2 and 3	previously sequenced at UKHSA
gas18940	M1UK	Throat swab	2014	UK	ERR12372117	PRJEB68199	Dataset 1, 2 and 3	previously sequenced at UKHSA
gas18941	M1UK	Throat swab	2014	UK	ERR12372118	PRJEB68199	Dataset 1, 2 and 3	previously sequenced at UKHSA
gas18951	M1UK	Throat swab	2014	UK	ERR12372119	PRJEB68199	Dataset 1, 2 and 3	previously sequenced at UKHSA
gas18954	M1Global	Throat swab	2014	UK	ERR12372120	PRJEB68199	Dataset 1 and 2	previously sequenced at UKHSA
gas24918	M1Global	Blood culture	2014	UK	ERR12372121	PRJEB68199	Dataset 1 and 2	previously sequenced at UKHSA
gas24923	M1UK	Throat swab	2014	UK	ERR12372122	PRJEB68199	Dataset 1, 2 and 3	previously sequenced at UKHSA
gas24930	M1Global	Throat swab	2014	UK	ERR12372123	PRJEB68199	Dataset 1 and 2	previously sequenced at UKHSA
gas24932	M1UK	Blood culture	2014	UK	ERR12372124	PRJEB68199	Dataset 1, 2 and 3	previously sequenced at UKHSA
gas24934	M1UK	Throat swab	2014	UK	ERR12372125	PRJEB68199	Dataset 1, 2 and 3	previously sequenced at UKHSA
gas24939	M1UK	Tissue	2014	UK	ERR12372126	PRJEB68199	Dataset 1, 2 and 3	previously sequenced at UKHSA
gas24946	M1UK	Throat swab	2014	UK	ERR12372127	PRJEB68199	Dataset 1, 2 and 3	previously sequenced at UKHSA
gas24968	M1Global	Blood culture	2014	UK	ERR12372128	PRJEB68199	Dataset 1 and 2	previously sequenced at UKHSA
gas24969	M1Global	Blood culture	2014	UK	ERR12372129	PRJEB68199	Dataset 1 and 2	previously sequenced at UKHSA
gas24975	M1UK	Blood culture	2014	UK	ERR12372130	PRJEB68199	Dataset 1, 2 and 3	previously sequenced at UKHSA
gas24977	M1UK	Throat swab	2014	UK	ERR12372131	PRJEB68199	Dataset 1, 2 and 3	previously sequenced at UKHSA
gas25106	M1Global	Information not provided	2014	UK	ERR12372132	PRJEB68199	Dataset 1 and 2	previously sequenced at UKHSA
gas25110	M1Global	Information not provided	2014	UK	ERR12372133	PRJEB68199	Dataset 1 and 2	previously sequenced at UKHSA
gas25132	M1UK	Information not provided	2014	UK	ERR12372134	PRJEB68199	Dataset 1, 2 and 3	previously sequenced at UKHSA
gas25138	23SNPs	Information not provided	2014	UK	ERR12372135	PRJEB68199	Dataset 1, 2 and 3	previously sequenced at UKHSA
gas25156	M1Global	Tissue	2014	UK	ERR12372136	PRJEB68199	Dataset 1 and 2	previously sequenced at UKHSA
gas25161	M1Global	Blood culture	2014	UK	ERR12372137	PRJEB68199	Dataset 1 and 2	previously sequenced at UKHSA
gas26020	M1UK	Blood culture	2014	UK	ERR12372138	PRJEB68199	Dataset 1, 2 and 3	previously sequenced at UKHSA
gas26040	M1UK	Throat swab	2014	UK	ERR12372139	PRJEB68199	Dataset 1, 2 and 3	previously sequenced at UKHSA
gas26042	M1Global	Blood culture	2014	UK	ERR12372140	PRJEB68199	Dataset 1 and 2	previously sequenced at UKHSA
gas26063	M1Global	Blood culture	2014	UK	ERR12372141	PRJEB68199	Dataset 1 and 2	previously sequenced at UKHSA
gas27637	M1UK	Pus	2014	UK	ERR12372142	PRJEB68199	Dataset 1, 2 and 3	previously sequenced at UKHSA
gas27639	M1Global	Other	2014	UK	ERR12372143	PRJEB68199	Dataset 1 and 2	previously sequenced at UKHSA
gas27643	M1Global	Eye	2014	UK	ERR12372144	PRJEB68199	Dataset 1 and 2	previously sequenced at UKHSA
gas27644	M1UK	Throat swab	2014	UK	ERR12372145	PRJEB68199	Dataset 1, 2 and 3	previously sequenced at UKHSA
gas27663	M1UK	Blood culture	2014	UK	ERR12372146	PRJEB68199	Dataset 1, 2 and 3	previously sequenced at UKHSA
gas27669	M1UK	Throat swab	2014	UK	ERR12372147	PRJEB68199	Dataset 1, 2 and 3	previously sequenced at UKHSA
gas27672	M1UK	Blood culture	2014	UK	ERR12372148	PRJEB68199	Dataset 1, 2 and 3	previously sequenced at UKHSA
gas27675	M1Global	Throat swab	2014	UK	ERR12372149	PRJEB68199	Dataset 1 and 2	previously sequenced at UKHSA
gas27677	M1Global	Blood culture	2014	UK	ERR12372150	PRJEB68199	Dataset 1 and 2	previously sequenced at UKHSA
gas27678	M1UK	Blood culture	2014	UK	ERR12372151	PRJEB68199	Dataset 1, 2 and 3	previously sequenced at UKHSA
gas27680	M1UK	Blood culture	2014	UK	ERR12372152	PRJEB68199	Dataset 1, 2 and 3	previously sequenced at UKHSA
gas27691	M1Global	Wound swab	2014	UK	ERR12372153	PRJEB68199	Dataset 1 and 2	previously sequenced at UKHSA
gas27694	M1Global	Throat swab	2014	UK	ERR12372154	PRJEB68199	Dataset 1 and 2	previously sequenced at UKHSA
gas27700	M1UK	Vaginal swab	2014	UK	ERR12372155	PRJEB68199	Dataset 1, 2 and 3	previously sequenced at UKHSA
gas27703	M1Global	Nose swab	2014	UK	ERR12372156	PRJEB68199	Dataset 1 and 2	previously sequenced at UKHSA
gas27704	M1UK	Swab	2014	UK	ERR12372157	PRJEB68199	Dataset 1, 2 and 3	previously sequenced at UKHSA
gas27705	M1UK	Blood culture	2014	UK	ERR12372158	PRJEB68199	Dataset 1, 2 and 3	previously sequenced at UKHSA
gas27711	M1UK	Swab	2014	UK	ERR12372159	PRJEB68199	Dataset 1, 2 and 3	previously sequenced at UKHSA
gas27719	M1Global	Blood culture	2014	UK	ERR12372160	PRJEB68199	Dataset 1 and 2	previously sequenced at UKHSA
gas30584	M1Global	Blood culture	2014	UK	ERR12372161	PRJEB68199	Dataset 1 and 2	previously sequenced at UKHSA
gas30593	M1Global	Blood culture	2014	UK	ERR12372162	PRJEB68199	Dataset 1 and 2	previously sequenced at UKHSA
gas30597	M1UK	Blood culture	2014	UK	ERR12372163	PRJEB68199	Dataset 1, 2 and 3	previously sequenced at UKHSA
gas30608	M1UK	Hip aspirate	2014	UK	ERR12372164	PRJEB68199	Dataset 1, 2 and 3	previously sequenced at UKHSA
gas30629	23SNPs	Throat swab	2014	UK	ERR12372165	PRJEB68199	Dataset 1, 2 and 3	previously sequenced at UKHSA
gas30630	M1Global	Blood culture	2014	UK	ERR12372166	PRJEB68199	Dataset 1 and 2	previously sequenced at UKHSA
gas30631	M1UK	Blood culture	2014	UK	ERR12372167	PRJEB68199	Dataset 1, 2 and 3	previously sequenced at UKHSA
gas30632	M1Global	Blood culture	2014	UK	ERR12372168	PRJEB68199	Dataset 1 and 2	previously sequenced at UKHSA
gas30633	M1UK	Wound swab	2014	UK	ERR12372169	PRJEB68199	Dataset 1, 2 and 3	previously sequenced at UKHSA
gas30637	M1UK	Blood culture	2014	UK	ERR12372170	PRJEB68199	Dataset 1, 2 and 3	previously sequenced at UKHSA
gas30644	M1UK	Blood culture	2014	UK	ERR12372171	PRJEB68199	Dataset 1, 2 and 3	previously sequenced at UKHSA
gas30648	M1UK	Blood culture	2014	UK	ERR12372172	PRJEB68199	Dataset 1, 2 and 3	previously sequenced at UKHSA
gas30653	M1UK	Blood culture	2014	UK	ERR12372173	PRJEB68199	Dataset 1, 2 and 3	previously sequenced at UKHSA
gas30660	M1Global	Blood culture	2014	UK	ERR12372174	PRJEB68199	Dataset 1 and 2	previously sequenced at UKHSA
gas30663	M1UK	Blood culture	2014	UK	ERR12372175	PRJEB68199	Dataset 1, 2 and 3	previously sequenced at UKHSA
gas30664	M1UK	Wound swab	2014	UK	ERR12372176	PRJEB68199	Dataset 1, 2 and 3	previously sequenced at UKHSA
gas30665	M1UK	Blood culture	2014	UK	ERR12372177	PRJEB68199	Dataset 1, 2 and 3	previously sequenced at UKHSA
gas30668	M1UK	Blood culture	2014	UK	ERR12372178	PRJEB68199	Dataset 1, 2 and 3	previously sequenced at UKHSA
gas32234	M1UK	Throat swab	2014	UK	ERR12372179	PRJEB68199	Dataset 1, 2 and 3	previously sequenced at UKHSA
gas32239	M1UK	Fluid	2014	UK	ERR12372180	PRJEB68199	Dataset 1, 2 and 3	previously sequenced at UKHSA
gas32244	M1UK	Blood culture	2014	UK	ERR12372181	PRJEB68199	Dataset 1, 2 and 3	previously sequenced at UKHSA
gas32249	M1UK	Blood culture	2014	UK	ERR12372182	PRJEB68199	Dataset 1, 2 and 3	previously sequenced at UKHSA
gas32250	M1UK	Blood culture	2014	UK	ERR12372183	PRJEB68199	Dataset 1, 2 and 3	previously sequenced at UKHSA
gas32256	M1UK	Blood culture	2014	UK	ERR12372184	PRJEB68199	Dataset 1, 2 and 3	previously sequenced at UKHSA
gas32262	M1UK	Throat swab	2014	UK	ERR12372185	PRJEB68199	Dataset 1, 2 and 3	previously sequenced at UKHSA
gas32277	M1UK	Swab	2014	UK	ERR12372186	PRJEB68199	Dataset 1, 2 and 3	previously sequenced at UKHSA
gas32279	M1UK	Blood culture	2014	UK	ERR12372187	PRJEB68199	Dataset 1, 2 and 3	previously sequenced at UKHSA
gas32289	M1UK	Abscess	2014	UK	ERR12372188	PRJEB68199	Dataset 1, 2 and 3	previously sequenced at UKHSA
gas32300	M1Global	Blood culture	2014	UK	ERR12372189	PRJEB68199	Dataset 1 and 2	previously sequenced at UKHSA
gas32302	M1UK	Blood culture	2014	UK	ERR12372190	PRJEB68199	Dataset 1, 2 and 3	previously sequenced at UKHSA
gas32306	M1Global	Blood culture	2014	UK	ERR12372191	PRJEB68199	Dataset 1 and 2	previously sequenced at UKHSA
gas32308	M1Global	Tissue	2014	UK	ERR12372192	PRJEB68199	Dataset 1 and 2	previously sequenced at UKHSA
gas32309	M1UK	Throat swab	2014	UK	ERR12372193	PRJEB68199	Dataset 1, 2 and 3	previously sequenced at UKHSA
gas32310	M1Global	Blood culture	2014	UK	ERR12372194	PRJEB68199	Dataset 1 and 2	previously sequenced at UKHSA
gas32311	M1Global	Blood culture	2014	UK	ERR12372195	PRJEB68199	Dataset 1 and 2	previously sequenced at UKHSA
gas32312	M1UK	Low vaginal swab	2014	UK	ERR12372196	PRJEB68199	Dataset 1, 2 and 3	previously sequenced at UKHSA
gas33014	M1UK	Blood culture	2014	UK	ERR12372197	PRJEB68199	Dataset 1, 2 and 3	previously sequenced at UKHSA
gas33015	M1UK	Blood culture	2014	UK	ERR12372198	PRJEB68199	Dataset 1, 2 and 3	previously sequenced at UKHSA
gas33033	M1Global	Blood culture	2014	UK	ERR12372199	PRJEB68199	Dataset 1 and 2	previously sequenced at UKHSA
gas37600	M1Global	Blood culture	2014	UK	ERR12372209	PRJEB68199	Dataset 1 and 2	previously sequenced at UKHSA
gas37601	M1UK	Blood culture	2014	UK	ERR12372210	PRJEB68199	Dataset 1, 2 and 3	previously sequenced at UKHSA
gas37612	M1UK	Low vaginal swab	2014	UK	ERR12372211	PRJEB68199	Dataset 1, 2 and 3	previously sequenced at UKHSA
gas37616	M1UK	Foetal lung	2014	UK	ERR12372212	PRJEB68199	Dataset 1, 2 and 3	previously sequenced at UKHSA
gas37617	M1Global	Blood culture	2014	UK	ERR12372213	PRJEB68199	Dataset 1 and 2	previously sequenced at UKHSA
gas37623	M1UK	Blood culture	2014	UK	ERR12372214	PRJEB68199	Dataset 1, 2 and 3	previously sequenced at UKHSA
gas37626	M1UK	Blood culture	2014	UK	ERR12372215	PRJEB68199	Dataset 1, 2 and 3	previously sequenced at UKHSA
gas37628	M1UK	Throat swab	2014	UK	ERR12372216	PRJEB68199	Dataset 1, 2 and 3	previously sequenced at UKHSA
gas37636	M1UK	Blood culture	2014	UK	ERR12372217	PRJEB68199	Dataset 1, 2 and 3	previously sequenced at UKHSA
gas37652	M1UK	Blood culture	2014	UK	ERR12372218	PRJEB68199	Dataset 1, 2 and 3	previously sequenced at UKHSA
gas37657	M1UK	Sputum	2014	UK	ERR12372219	PRJEB68199	Dataset 1, 2 and 3	previously sequenced at UKHSA
gas37661	M1UK	Blood culture	2014	UK	ERR12372220	PRJEB68199	Dataset 1, 2 and 3	previously sequenced at UKHSA
gas37667	M1UK	Throat swab	2014	UK	ERR12372221	PRJEB68199	Dataset 1, 2 and 3	previously sequenced at UKHSA
gas37668	M1UK	Blood culture	2014	UK	ERR12372222	PRJEB68199	Dataset 1, 2 and 3	previously sequenced at UKHSA
gas37669	M1UK	Swab	2014	UK	ERR12372223	PRJEB68199	Dataset 1, 2 and 3	previously sequenced at UKHSA
gas37671	M1UK	Wound swab	2014	UK	ERR12372224	PRJEB68199	Dataset 1, 2 and 3	previously sequenced at UKHSA
gas37677	M1UK	Tissue	2014	UK	ERR12372225	PRJEB68199	Dataset 1, 2 and 3	previously sequenced at UKHSA
gas37684	M1UK	Blood culture	2014	UK	ERR12372226	PRJEB68199	Dataset 1, 2 and 3	previously sequenced at UKHSA
gas37689	M1UK	Blood culture	2014	UK	ERR12372227	PRJEB68199	Dataset 1, 2 and 3	previously sequenced at UKHSA
gas37696	M1UK	Blood culture	2014	UK	ERR12372228	PRJEB68199	Dataset 1, 2 and 3	previously sequenced at UKHSA
gas37702	M1UK	Knee aspirate	2014	UK	ERR12372229	PRJEB68199	Dataset 1, 2 and 3	previously sequenced at UKHSA
gas37708	M1UK	Blood culture	2014	UK	ERR12372230	PRJEB68199	Dataset 1, 2 and 3	previously sequenced at UKHSA
gas37731	M1UK	Pus	2014	UK	ERR12372231	PRJEB68199	Dataset 1, 2 and 3	previously sequenced at UKHSA
gas37737	M1Global	Blood culture	2014	UK	ERR12372232	PRJEB68199	Dataset 1 and 2	previously sequenced at UKHSA
gas37744	M1UK	Wound drain	2014	UK	ERR12372233	PRJEB68199	Dataset 1, 2 and 3	previously sequenced at UKHSA
gas38788	M1UK	Skin/wound	2014	UK	ERR12372234	PRJEB68199	Dataset 1, 2 and 3	previously sequenced at UKHSA
gas38792	M1UK	Swab	2014	UK	ERR12372235	PRJEB68199	Dataset 1, 2 and 3	previously sequenced at UKHSA
gas38798	M1UK	Throat swab	2014	UK	ERR12372236	PRJEB68199	Dataset 1, 2 and 3	previously sequenced at UKHSA
gas38799	M1UK	Blood culture	2014	UK	ERR12372237	PRJEB68199	Dataset 1, 2 and 3	previously sequenced at UKHSA
gas38809	M1UK	Blood culture	2014	UK	ERR12372238	PRJEB68199	Dataset 1, 2 and 3	previously sequenced at UKHSA
gas38811	M1UK	Eye swab	2014	UK	ERR12372239	PRJEB68199	Dataset 1, 2 and 3	previously sequenced at UKHSA
gas38819	M1UK	Blood culture	2014	UK	ERR12372240	PRJEB68199	Dataset 1, 2 and 3	previously sequenced at UKHSA
gas38823	M1UK	Biopsy	2014	UK	ERR12372241	PRJEB68199	Dataset 1, 2 and 3	previously sequenced at UKHSA
gas38839	M1Global	Blood culture	2014	UK	ERR12372242	PRJEB68199	Dataset 1 and 2	previously sequenced at UKHSA
gas38845	13SNPs	Blood culture	2014	UK	ERR12372243	PRJEB68199	Dataset 1, 2 and 3	previously sequenced at UKHSA
gas38846	M1UK	Blood culture	2014	UK	ERR12372244	PRJEB68199	Dataset 1, 2 and 3	previously sequenced at UKHSA
gas39593	M1Global	Throat swab	2014	UK	ERR12372268	PRJEB68199	Dataset 1 and 2	previously sequenced at UKHSA
gas39600	13SNPs	Pleural fluid	2014	UK	ERR12372269	PRJEB68199	Dataset 1, 2 and 3	previously sequenced at UKHSA
gas39616	13SNPs	Pus	2014	UK	ERR12372270	PRJEB68199	Dataset 1, 2 and 3	previously sequenced at UKHSA
gas39619	M1UK	Blood culture	2014	UK	ERR12372271	PRJEB68199	Dataset 1, 2 and 3	previously sequenced at UKHSA
gas39621	M1UK	Environmental: chair handle	2014	UK	ERR12372272	PRJEB68199	Dataset 1, 2 and 3	previously sequenced at UKHSA
gas39624	M1UK	Information not provided	2014	UK	ERR12372273	PRJEB68199	Dataset 1, 2 and 3	previously sequenced at UKHSA
gas39638	M1Global	Blood culture	2014	UK	ERR12372274	PRJEB68199	Dataset 1 and 2	previously sequenced at UKHSA
gas39642	M1UK	Blood culture	2014	UK	ERR12372275	PRJEB68199	Dataset 1, 2 and 3	previously sequenced at UKHSA
gas39643	M1UK	Blood culture	2014	UK	ERR12372276	PRJEB68199	Dataset 1, 2 and 3	previously sequenced at UKHSA
gas39649	M1UK	Skin/wound	2014	UK	ERR12372277	PRJEB68199	Dataset 1, 2 and 3	previously sequenced at UKHSA
gas39653	M1UK	Blood culture	2014	UK	ERR12372278	PRJEB68199	Dataset 1, 2 and 3	previously sequenced at UKHSA
gas45752	M1UK	Throat swab	2014	UK	ERR12372279	PRJEB68199	Dataset 1, 2 and 3	previously sequenced at UKHSA
gas45755	M1UK	Throat swab	2014	UK	ERR12372280	PRJEB68199	Dataset 1, 2 and 3	previously sequenced at UKHSA
gas45770	M1UK	Throat swab	2014	UK	ERR12372281	PRJEB68199	Dataset 1, 2 and 3	previously sequenced at UKHSA
gas45773	M1Global	Throat swab	2014	UK	ERR12372282	PRJEB68199	Dataset 1 and 2	previously sequenced at UKHSA
gas45799	M1UK	Throat swab	2014	UK	ERR12372283	PRJEB68199	Dataset 1, 2 and 3	previously sequenced at UKHSA
gas45805	M1Global	Throat swab	2014	UK	ERR12372284	PRJEB68199	Dataset 1 and 2	previously sequenced at UKHSA
gas55067	M1UK	Throat swab	2014	UK	ERR12372298	PRJEB68199	Dataset 1, 2 and 3	previously sequenced at UKHSA
gas55069	M1UK	Throat swab	2014	UK	ERR12372299	PRJEB68199	Dataset 1, 2 and 3	previously sequenced at UKHSA
gas55070	M1UK	Information not provided	2014	UK	ERR12372300	PRJEB68199	Dataset 1, 2 and 3	previously sequenced at UKHSA
gas55071	M1Global	Throat swab	2014	UK	ERR12372301	PRJEB68199	Dataset 1 and 2	previously sequenced at UKHSA
gas55079	M1UK	Other	2014	UK	ERR12372302	PRJEB68199	Dataset 1, 2 and 3	previously sequenced at UKHSA
gas55081	M1Global	Throat swab	2014	UK	ERR12372303	PRJEB68199	Dataset 1 and 2	previously sequenced at UKHSA
gas55082	M1UK	Throat swab	2014	UK	ERR12372304	PRJEB68199	Dataset 1, 2 and 3	previously sequenced at UKHSA
gas55097	M1Global	Wound drain	2014	UK	ERR12372305	PRJEB68199	Dataset 1 and 2	previously sequenced at UKHSA
gas55100	M1Global	Wound drain	2014	UK	ERR12372306	PRJEB68199	Dataset 1 and 2	previously sequenced at UKHSA
gas55107	M1UK	Throat swab	2014	UK	ERR12372307	PRJEB68199	Dataset 1, 2 and 3	previously sequenced at UKHSA
gas55112	M1UK	Throat swab	2014	UK	ERR12372308	PRJEB68199	Dataset 1, 2 and 3	previously sequenced at UKHSA
gas55121	M1UK	Throat swab	2014	UK	ERR12372309	PRJEB68199	Dataset 1, 2 and 3	previously sequenced at UKHSA
gas56049	M1Global	Blood	2014	UK	ERR12372310	PRJEB68199	Dataset 1 and 2	previously sequenced at UKHSA
gas56050	13SNPs	Blood	2014	UK	ERR12372311	PRJEB68199	Dataset 1, 2 and 3	previously sequenced at UKHSA
gas56055	M1Global	Blood	2014	UK	ERR12372312	PRJEB68199	Dataset 1 and 2	previously sequenced at UKHSA
gas56063	M1UK	Information not provided	2014	UK	ERR12372313	PRJEB68199	Dataset 1, 2 and 3	previously sequenced at UKHSA
gas56092	M1Global	Blood culture	2014	UK	ERR12372314	PRJEB68199	Dataset 1 and 2	previously sequenced at UKHSA
gas56096	M1Global	Tissue	2014	UK	ERR12372315	PRJEB68199	Dataset 1 and 2	previously sequenced at UKHSA
gas57686	M1Global	Tissue	2014	UK	ERR12372316	PRJEB68199	Dataset 1 and 2	previously sequenced at UKHSA
gas57696	M1UK	Blood culture	2014	UK	ERR12372317	PRJEB68199	Dataset 1, 2 and 3	previously sequenced at UKHSA
gas57704	M1Global	Blood culture	2014	UK	ERR12372318	PRJEB68199	Dataset 1 and 2	previously sequenced at UKHSA
gas57712	M1Global	Blood	2014	UK	ERR12372319	PRJEB68199	Dataset 1 and 2	previously sequenced at UKHSA
gas57713	M1UK	Blood culture	2014	UK	ERR12372320	PRJEB68199	Dataset 1, 2 and 3	previously sequenced at UKHSA
gas57717	M1UK	Blood culture	2014	UK	ERR12372321	PRJEB68199	Dataset 1, 2 and 3	previously sequenced at UKHSA
gas57722	M1Global	Throat swab	2014	UK	ERR12372322	PRJEB68199	Dataset 1 and 2	previously sequenced at UKHSA
gas57730	M1UK	Blood culture	2014	UK	ERR12372323	PRJEB68199	Dataset 1, 2 and 3	previously sequenced at UKHSA
gas58264	M1UK	Blood culture	2014	UK	ERR12372324	PRJEB68199	Dataset 1, 2 and 3	previously sequenced at UKHSA
gas58268	M1Global	Blood culture	2014	UK	ERR12372325	PRJEB68199	Dataset 1 and 2	previously sequenced at UKHSA
gas58269	M1Global	Blood culture	2014	UK	ERR12372326	PRJEB68199	Dataset 1 and 2	previously sequenced at UKHSA
gas58279	M1UK	Leg wound swab	2014	UK	ERR12372327	PRJEB68199	Dataset 1, 2 and 3	previously sequenced at UKHSA
gas58280	M1UK	Blood	2014	UK	ERR12372328	PRJEB68199	Dataset 1, 2 and 3	previously sequenced at UKHSA
gas58287	M1Global	Blood culture	2014	UK	ERR12372329	PRJEB68199	Dataset 1 and 2	previously sequenced at UKHSA
gas58291	M1UK	Tissue	2014	UK	ERR12372330	PRJEB68199	Dataset 1, 2 and 3	previously sequenced at UKHSA
gas60024	M1Global	Throat swab	2014	UK	ERR12372345	PRJEB68199	Dataset 1 and 2	previously sequenced at UKHSA
gas60027	M1Global	Throat swab	2014	UK	ERR12372346	PRJEB68199	Dataset 1 and 2	previously sequenced at UKHSA
gas60030	M1UK	Sputum	2014	UK	ERR12372347	PRJEB68199	Dataset 1, 2 and 3	previously sequenced at UKHSA
gas60039	M1Global	Brain biopsy	2014	UK	ERR12372348	PRJEB68199	Dataset 1 and 2	previously sequenced at UKHSA
gas60428	M1UK	Swab	2014	UK	ERR12372349	PRJEB68199	Dataset 1, 2 and 3	previously sequenced at UKHSA
gas62503	M1Global	Blood culture	2014	UK	ERR12372351	PRJEB68199	Dataset 1 and 2	previously sequenced at UKHSA
gas64999	M1UK	Information not provided	2014	UK	ERR12372367	PRJEB68199	Dataset 1, 2 and 3	previously sequenced at UKHSA
gas65087	M1Global	Blood culture	2014	UK	ERR12372368	PRJEB68199	Dataset 1 and 2	previously sequenced at UKHSA
gas65095	M1UK	Wound swab	2014	UK	ERR12372369	PRJEB68199	Dataset 1, 2 and 3	previously sequenced at UKHSA
gas67458	M1UK	Blood culture	2013	UK	ERR12372371	PRJEB68199	Dataset 1, 2 and 3	previously sequenced at UKHSA
gas67467	M1UK	Swab	2014	UK	ERR12372372	PRJEB68199	Dataset 1, 2 and 3	previously sequenced at UKHSA
gas67478	M1Global	Blood culture	2014	UK	ERR12372373	PRJEB68199	Dataset 1 and 2	previously sequenced at UKHSA
gas67479	13SNPs	Blood culture	2014	UK	ERR12372374	PRJEB68199	Dataset 1, 2 and 3	previously sequenced at UKHSA
gas67481	M1UK	Blood culture	2014	UK	ERR12372375	PRJEB68199	Dataset 1, 2 and 3	previously sequenced at UKHSA
gas67489	M1Global	Blood culture	2014	UK	ERR12372376	PRJEB68199	Dataset 1 and 2	previously sequenced at UKHSA
gas67497	M1UK	Blood culture	2014	UK	ERR12372377	PRJEB68199	Dataset 1, 2 and 3	previously sequenced at UKHSA
gas67498	M1UK	Blood culture	2014	UK	ERR12372378	PRJEB68199	Dataset 1, 2 and 3	previously sequenced at UKHSA
gas67693	M1UK	Blood culture	2014	UK	ERR12372379	PRJEB68199	Dataset 1, 2 and 3	previously sequenced at UKHSA
gas67701	M1Global	Blood culture	2014	UK	ERR12372380	PRJEB68199	Dataset 1 and 2	previously sequenced at UKHSA
gas67741	M1UK	Blood culture	2014	UK	ERR12372381	PRJEB68199	Dataset 1, 2 and 3	previously sequenced at UKHSA
gas68910	23SNPs	Tissue	2014	UK	ERR12372382	PRJEB68199	Dataset 1, 2 and 3	previously sequenced at UKHSA
gas68918	M1UK	Blood culture	2014	UK	ERR12372383	PRJEB68199	Dataset 1, 2 and 3	previously sequenced at UKHSA
gas68924	M1UK	Blood culture	2014	UK	ERR12372384	PRJEB68199	Dataset 1, 2 and 3	previously sequenced at UKHSA
gas68926	M1UK	Swab	2014	UK	ERR12372385	PRJEB68199	Dataset 1, 2 and 3	previously sequenced at UKHSA
gas68927	M1UK	Blood culture	2014	UK	ERR12372386	PRJEB68199	Dataset 1, 2 and 3	previously sequenced at UKHSA
gas68933	M1UK	Sputum	2014	UK	ERR12372387	PRJEB68199	Dataset 1, 2 and 3	previously sequenced at UKHSA
gas68938	M1Global	Pus	2014	UK	ERR12372388	PRJEB68199	Dataset 1 and 2	previously sequenced at UKHSA
gas68939	M1UK	Csf	2014	UK	ERR12372389	PRJEB68199	Dataset 1, 2 and 3	previously sequenced at UKHSA
gas68952	M1UK	Other	2014	UK	ERR12372390	PRJEB68199	Dataset 1, 2 and 3	previously sequenced at UKHSA
gas69137	M1Global	Blood culture	2014	UK	ERR12372391	PRJEB68199	Dataset 1 and 2	previously sequenced at UKHSA
gas69147	M1UK	Vaginal swab	2014	UK	ERR12372392	PRJEB68199	Dataset 1, 2 and 3	previously sequenced at UKHSA
gas70027	M1UK	Blood culture	2014	UK	ERR12372393	PRJEB68199	Dataset 1, 2 and 3	previously sequenced at UKHSA
gas70028	M1UK	Other	2014	UK	ERR12372394	PRJEB68199	Dataset 1, 2 and 3	previously sequenced at UKHSA
gas71781	M1UK	Blood culture	2014	UK	ERR12372403	PRJEB68199	Dataset 1, 2 and 3	previously sequenced at UKHSA
gas71795	M1UK	Blood culture	2014	UK	ERR12372404	PRJEB68199	Dataset 1, 2 and 3	previously sequenced at UKHSA
gas73054	M1UK	Blood culture	2014	UK	ERR12372405	PRJEB68199	Dataset 1, 2 and 3	previously sequenced at UKHSA
gas73057	M1Global	Blood culture	2014	UK	ERR12372406	PRJEB68199	Dataset 1 and 2	previously sequenced at UKHSA
gas73072	M1UK	Blood culture	2014	UK	ERR12372407	PRJEB68199	Dataset 1, 2 and 3	previously sequenced at UKHSA
gas73073	M1Global	Blood culture	2014	UK	ERR12372408	PRJEB68199	Dataset 1 and 2	previously sequenced at UKHSA
gas73077	M1Global	Blood culture	2014	UK	ERR12372409	PRJEB68199	Dataset 1 and 2	previously sequenced at UKHSA
gas73081	M1UK	Blood culture	2014	UK	ERR12372410	PRJEB68199	Dataset 1, 2 and 3	previously sequenced at UKHSA
gas73086	M1Global	Bronchial alveolar lavage	2014	UK	ERR12372411	PRJEB68199	Dataset 1 and 2	previously sequenced at UKHSA
gas75610	M1UK	Csf	2014	UK	ERR12372412	PRJEB68199	Dataset 1, 2 and 3	previously sequenced at UKHSA
gas75618	M1UK	Information not provided	2014	UK	ERR12372413	PRJEB68199	Dataset 1, 2 and 3	previously sequenced at UKHSA
gas75625	M1UK	Wound swab	2014	UK	ERR12372414	PRJEB68199	Dataset 1, 2 and 3	previously sequenced at UKHSA
gas75631	M1UK	Blood culture	2014	UK	ERR12372415	PRJEB68199	Dataset 1, 2 and 3	previously sequenced at UKHSA
gas75635	M1UK	Blood culture	2014	UK	ERR12372416	PRJEB68199	Dataset 1, 2 and 3	previously sequenced at UKHSA
gas75638	M1UK	Blood culture	2014	UK	ERR12372417	PRJEB68199	Dataset 1, 2 and 3	previously sequenced at UKHSA
gas75642	M1Global	Ear swab	2014	UK	ERR12372418	PRJEB68199	Dataset 1 and 2	previously sequenced at UKHSA
gas75658	M1Global	Blood culture	2014	UK	ERR12372419	PRJEB68199	Dataset 1 and 2	previously sequenced at UKHSA
gas77217	M1UK	Vaginal swab	2014	UK	ERR12372420	PRJEB68199	Dataset 1, 2 and 3	previously sequenced at UKHSA
gas77248	M1Global	Other	2014	UK	ERR12372421	PRJEB68199	Dataset 1 and 2	previously sequenced at UKHSA
gas77257	M1UK	Pleural fluid	2014	UK	ERR12372422	PRJEB68199	Dataset 1, 2 and 3	previously sequenced at UKHSA
gas77274	M1UK	Blood culture	2014	UK	ERR12372423	PRJEB68199	Dataset 1, 2 and 3	previously sequenced at UKHSA
gas78963	23SNPs	Blood culture	2014	UK	ERR12372424	PRJEB68199	Dataset 1, 2 and 3	previously sequenced at UKHSA
gas79000	M1UK	Throat swab	2015	UK	ERR12372425	PRJEB68199	Dataset 1, 2 and 3	previously sequenced at UKHSA
gas79013	M1UK	Blood culture	2015	UK	ERR12372426	PRJEB68199	Dataset 1, 2 and 3	previously sequenced at UKHSA
gas79016	M1UK	Blood culture	2014	UK	ERR12372427	PRJEB68199	Dataset 1, 2 and 3	previously sequenced at UKHSA
gas79020	M1Global	Blood culture	2014	UK	ERR12372428	PRJEB68199	Dataset 1 and 2	previously sequenced at UKHSA
gas79024	M1UK	Pus	2014	UK	ERR12372429	PRJEB68199	Dataset 1, 2 and 3	previously sequenced at UKHSA
gas81099	M1UK	Blood culture	2014	UK	ERR12372430	PRJEB68199	Dataset 1, 2 and 3	previously sequenced at UKHSA
gas81102	M1UK	Throat swab	2014	UK	ERR12372431	PRJEB68199	Dataset 1, 2 and 3	previously sequenced at UKHSA
gas81105	M1Global	Blood culture	2014	UK	ERR12372432	PRJEB68199	Dataset 1 and 2	previously sequenced at UKHSA
gas81114	M1UK	Blood culture	2014	UK	ERR12372433	PRJEB68199	Dataset 1, 2 and 3	previously sequenced at UKHSA
gas81121	M1UK	Blood culture	2014	UK	ERR12372434	PRJEB68199	Dataset 1, 2 and 3	previously sequenced at UKHSA
gas81133	M1UK	Blood culture	2014	UK	ERR12372435	PRJEB68199	Dataset 1, 2 and 3	previously sequenced at UKHSA
gas81136	M1UK	Pleural fluid	2014	UK	ERR12372436	PRJEB68199	Dataset 1, 2 and 3	previously sequenced at UKHSA
gas81138	M1UK	Blood culture	2014	UK	ERR12372437	PRJEB68199	Dataset 1, 2 and 3	previously sequenced at UKHSA
gas81151	M1Global	Blood culture	2014	UK	ERR12372438	PRJEB68199	Dataset 1 and 2	previously sequenced at UKHSA
gas81155	M1UK	Blood culture	2014	UK	ERR12372439	PRJEB68199	Dataset 1, 2 and 3	previously sequenced at UKHSA
gas81578	M1Global	Blood culture	2014	UK	ERR12372440	PRJEB68199	Dataset 1 and 2	previously sequenced at UKHSA
gas81579	M1UK	Blood culture	2015	UK	ERR12372441	PRJEB68199	Dataset 1, 2 and 3	previously sequenced at UKHSA
gas81585	M1UK	Blood culture	2015	UK	ERR12372442	PRJEB68199	Dataset 1, 2 and 3	previously sequenced at UKHSA
gas81587	M1UK	Blood culture	2015	UK	ERR12372443	PRJEB68199	Dataset 1, 2 and 3	previously sequenced at UKHSA
gas81592	M1Global	Blood culture	2015	UK	ERR12372444	PRJEB68199	Dataset 1 and 2	previously sequenced at UKHSA
gas81593	M1UK	Blood culture	2015	UK	ERR12372445	PRJEB68199	Dataset 1, 2 and 3	previously sequenced at UKHSA
gas81595	M1Global	Blood culture	2015	UK	ERR12372446	PRJEB68199	Dataset 1 and 2	previously sequenced at UKHSA
gas81597	M1Global	Blood culture	2014	UK	ERR12372447	PRJEB68199	Dataset 1 and 2	previously sequenced at UKHSA
gas81599	M1UK	Pleural fluid	2014	UK	ERR12372448	PRJEB68199	Dataset 1, 2 and 3	previously sequenced at UKHSA
gas81603	M1Global	Blood culture	2015	UK	ERR12372449	PRJEB68199	Dataset 1 and 2	previously sequenced at UKHSA
gas81621	M1UK	Tissue	2015	UK	ERR12372450	PRJEB68199	Dataset 1, 2 and 3	previously sequenced at UKHSA
gas83604	M1UK	Blood culture	2015	UK	ERR12372451	PRJEB68199	Dataset 1, 2 and 3	previously sequenced at UKHSA
gas83608	M1UK	Blood culture	2015	UK	ERR12372452	PRJEB68199	Dataset 1, 2 and 3	previously sequenced at UKHSA
gas83609	M1Global	Blood culture	2015	UK	ERR12372453	PRJEB68199	Dataset 1 and 2	previously sequenced at UKHSA
gas83610	M1Global	Tissue	2015	UK	ERR12372454	PRJEB68199	Dataset 1 and 2	previously sequenced at UKHSA
gas83622	M1UK	Blood culture	2014	UK	ERR12372455	PRJEB68199	Dataset 1, 2 and 3	previously sequenced at UKHSA
gas83625	13SNPs	Blood culture	2015	UK	ERR12372456	PRJEB68199	Dataset 1, 2 and 3	previously sequenced at UKHSA
gas83635	M1Global	Blood culture	2015	UK	ERR12372457	PRJEB68199	Dataset 1 and 2	previously sequenced at UKHSA
gas83639	M1UK	Blood culture	2015	UK	ERR12372458	PRJEB68199	Dataset 1, 2 and 3	previously sequenced at UKHSA
gas83640	M1Global	Blood culture	2015	UK	ERR12372459	PRJEB68199	Dataset 1 and 2	previously sequenced at UKHSA
gas83645	M1Global	Blood culture	2015	UK	ERR12372460	PRJEB68199	Dataset 1 and 2	previously sequenced at UKHSA
gas83648	M1UK	Blood culture	2015	UK	ERR12372461	PRJEB68199	Dataset 1, 2 and 3	previously sequenced at UKHSA
gas83654	M1UK	Blood culture	2015	UK	ERR12372462	PRJEB68199	Dataset 1, 2 and 3	previously sequenced at UKHSA
gas83655	M1UK	Wound swab	2015	UK	ERR12372463	PRJEB68199	Dataset 1, 2 and 3	previously sequenced at UKHSA
gas87968	M1Global	Blood culture	2014	UK	ERR12372464	PRJEB68199	Dataset 1 and 2	previously sequenced at UKHSA
gas87979	M1UK	Blood culture	2014	UK	ERR12372465	PRJEB68199	Dataset 1, 2 and 3	previously sequenced at UKHSA
gas87983	M1Global	High vaginal swab	2014	UK	ERR12372466	PRJEB68199	Dataset 1 and 2	previously sequenced at UKHSA
gas87987	M1UK	Pleural fluid	2014	UK	ERR12372467	PRJEB68199	Dataset 1, 2 and 3	previously sequenced at UKHSA
gas87997	M1UK	Blood culture	2014	UK	ERR12372468	PRJEB68199	Dataset 1, 2 and 3	previously sequenced at UKHSA
gas88011	M1UK	Pus	2014	UK	ERR12372469	PRJEB68199	Dataset 1, 2 and 3	previously sequenced at UKHSA
gas88013	M1UK	Sputum	2014	UK	ERR12372470	PRJEB68199	Dataset 1, 2 and 3	previously sequenced at UKHSA
gas89036	M1Global	Blood culture	2015	UK	ERR12372471	PRJEB68199	Dataset 1 and 2	previously sequenced at UKHSA
gas89046	M1UK	Blood culture	2015	UK	ERR12372472	PRJEB68199	Dataset 1, 2 and 3	previously sequenced at UKHSA
gas89050	M1Global	Blood culture	2015	UK	ERR12372473	PRJEB68199	Dataset 1 and 2	previously sequenced at UKHSA
gas89053	M1UK	Blood culture	2015	UK	ERR12372474	PRJEB68199	Dataset 1, 2 and 3	previously sequenced at UKHSA
gas89054	M1Global	Tissue	2015	UK	ERR12372475	PRJEB68199	Dataset 1 and 2	previously sequenced at UKHSA
gas89056	M1UK	Blood culture	2015	UK	ERR12372476	PRJEB68199	Dataset 1, 2 and 3	previously sequenced at UKHSA
gas89067	M1Global	Blood culture	2015	UK	ERR12372477	PRJEB68199	Dataset 1 and 2	previously sequenced at UKHSA
gas89072	M1UK	Blood culture	2015	UK	ERR12372478	PRJEB68199	Dataset 1, 2 and 3	previously sequenced at UKHSA
gas89073	M1UK	Blood culture	2015	UK	ERR12372479	PRJEB68199	Dataset 1, 2 and 3	previously sequenced at UKHSA
gas89074	M1Global	Blood culture	2015	UK	ERR12372480	PRJEB68199	Dataset 1 and 2	previously sequenced at UKHSA
gas90109	M1UK	Blood culture	2015	UK	ERR12372481	PRJEB68199	Dataset 1, 2 and 3	previously sequenced at UKHSA
gas90115	13SNPs	Information not provided	2015	UK	ERR12372482	PRJEB68199	Dataset 1, 2 and 3	previously sequenced at UKHSA
gas90119	M1UK	Blood culture	2015	UK	ERR12372483	PRJEB68199	Dataset 1, 2 and 3	previously sequenced at UKHSA
gas90124	M1UK	Blood culture	2015	UK	ERR12372484	PRJEB68199	Dataset 1, 2 and 3	previously sequenced at UKHSA
gas90130	M1UK	Wound swab	2015	UK	ERR12372485	PRJEB68199	Dataset 1, 2 and 3	previously sequenced at UKHSA
gas90131	M1UK	Tissue	2015	UK	ERR12372486	PRJEB68199	Dataset 1, 2 and 3	previously sequenced at UKHSA
gas90140	M1Global	Blood culture	2015	UK	ERR12372487	PRJEB68199	Dataset 1 and 2	previously sequenced at UKHSA
gas90141	M1UK	Blood culture	2015	UK	ERR12372488	PRJEB68199	Dataset 1, 2 and 3	previously sequenced at UKHSA
gas90144	M1UK	Blood culture	2015	UK	ERR12372489	PRJEB68199	Dataset 1, 2 and 3	previously sequenced at UKHSA
gas90153	M1UK	Blood culture	2015	UK	ERR12372490	PRJEB68199	Dataset 1, 2 and 3	previously sequenced at UKHSA
gas90154	M1UK	Blood culture	2015	UK	ERR12372491	PRJEB68199	Dataset 1, 2 and 3	previously sequenced at UKHSA
gas90162	M1UK	Blood culture	2015	UK	ERR12372492	PRJEB68199	Dataset 1, 2 and 3	previously sequenced at UKHSA
gas91910	M1UK	Tissue	2015	UK	ERR12372493	PRJEB68199	Dataset 1, 2 and 3	previously sequenced at UKHSA
gas91913	M1UK	Blood culture	2015	UK	ERR12372494	PRJEB68199	Dataset 1, 2 and 3	previously sequenced at UKHSA
gas91916	23SNPs	Blood culture	2015	UK	ERR12372495	PRJEB68199	Dataset 1, 2 and 3	previously sequenced at UKHSA
gas91922	M1UK	Knee aspirate	2015	UK	ERR12372496	PRJEB68199	Dataset 1, 2 and 3	previously sequenced at UKHSA
gas91924	M1UK	Blood culture	2015	UK	ERR12372497	PRJEB68199	Dataset 1, 2 and 3	previously sequenced at UKHSA
gas91946	M1UK	Blood culture	2015	UK	ERR12372498	PRJEB68199	Dataset 1, 2 and 3	previously sequenced at UKHSA
gas91957	M1UK	Blood culture	2015	UK	ERR12372499	PRJEB68199	Dataset 1, 2 and 3	previously sequenced at UKHSA
gas91959	M1UK	Aortic valve	2015	UK	ERR12372500	PRJEB68199	Dataset 1, 2 and 3	previously sequenced at UKHSA
gas92936	M1UK	Csf	2015	UK	ERR12372501	PRJEB68199	Dataset 1, 2 and 3	previously sequenced at UKHSA
gas92943	M1UK	Joint	2015	UK	ERR12372502	PRJEB68199	Dataset 1, 2 and 3	previously sequenced at UKHSA
gas92954	M1UK	Sputum	2015	UK	ERR12372503	PRJEB68199	Dataset 1, 2 and 3	previously sequenced at UKHSA
gas92960	M1UK	Blood culture	2015	UK	ERR12372504	PRJEB68199	Dataset 1, 2 and 3	previously sequenced at UKHSA
gas92966	M1UK	Pleural fluid	2015	UK	ERR12372505	PRJEB68199	Dataset 1, 2 and 3	previously sequenced at UKHSA
gas92989	M1Global	Blood culture	2015	UK	ERR12372506	PRJEB68199	Dataset 1 and 2	previously sequenced at UKHSA
gas92991	M1UK	Blood	2015	UK	ERR12372507	PRJEB68199	Dataset 1, 2 and 3	previously sequenced at UKHSA
gas96071	M1Global	Tissue	2015	UK	ERR12372533	PRJEB68199	Dataset 1 and 2	previously sequenced at UKHSA
gas96072	M1UK	Blood culture	2015	UK	ERR12372534	PRJEB68199	Dataset 1, 2 and 3	previously sequenced at UKHSA
gas96073	M1UK	Blood culture	2015	UK	ERR12372535	PRJEB68199	Dataset 1, 2 and 3	previously sequenced at UKHSA
gas96086	M1UK	Sputum	2015	UK	ERR12372536	PRJEB68199	Dataset 1, 2 and 3	previously sequenced at UKHSA
gas96092	M1UK	Blood	2015	UK	ERR12372537	PRJEB68199	Dataset 1, 2 and 3	previously sequenced at UKHSA
gas96099	13SNPs	Blood	2015	UK	ERR12372538	PRJEB68199	Dataset 1, 2 and 3	previously sequenced at UKHSA
gas96128	M1UK	Pus	2015	UK	ERR12372539	PRJEB68199	Dataset 1, 2 and 3	previously sequenced at UKHSA
gas96131	M1UK	Blood culture	2015	UK	ERR12372540	PRJEB68199	Dataset 1, 2 and 3	previously sequenced at UKHSA
gas96136	M1UK	Blood culture	2015	UK	ERR12372541	PRJEB68199	Dataset 1, 2 and 3	previously sequenced at UKHSA
gas96137	M1UK	Blood culture	2015	UK	ERR12372542	PRJEB68199	Dataset 1, 2 and 3	previously sequenced at UKHSA
gas96138	M1UK	Blood culture	2015	UK	ERR12372543	PRJEB68199	Dataset 1, 2 and 3	previously sequenced at UKHSA
gas96139	M1UK	Blood culture	2015	UK	ERR12372544	PRJEB68199	Dataset 1, 2 and 3	previously sequenced at UKHSA
gas96140	M1UK	Blood culture	2015	UK	ERR12372545	PRJEB68199	Dataset 1, 2 and 3	previously sequenced at UKHSA
gas96144	M1UK	Blood culture	2015	UK	ERR12372546	PRJEB68199	Dataset 1, 2 and 3	previously sequenced at UKHSA
gas96152	M1UK	Blood culture	2015	UK	ERR12372547	PRJEB68199	Dataset 1, 2 and 3	previously sequenced at UKHSA
gas96158	M1UK	Blood culture	2015	UK	ERR12372548	PRJEB68199	Dataset 1, 2 and 3	previously sequenced at UKHSA
gas96160	M1UK	Blood culture	2015	UK	ERR12372549	PRJEB68199	Dataset 1, 2 and 3	previously sequenced at UKHSA
gas96161	M1UK	Blood culture	2015	UK	ERR12372550	PRJEB68199	Dataset 1, 2 and 3	previously sequenced at UKHSA
gas96162	M1UK	Pus	2015	UK	ERR12372551	PRJEB68199	Dataset 1, 2 and 3	previously sequenced at UKHSA
gas96164	M1Global	High vaginal swab	2015	UK	ERR12372552	PRJEB68199	Dataset 1 and 2	previously sequenced at UKHSA
gas96176	M1UK	Blood culture	2015	UK	ERR12372553	PRJEB68199	Dataset 1, 2 and 3	previously sequenced at UKHSA
gas96182	M1UK	Blood culture	2015	UK	ERR12372554	PRJEB68199	Dataset 1, 2 and 3	previously sequenced at UKHSA
gas96184	M1UK	Blood culture	2015	UK	ERR12372555	PRJEB68199	Dataset 1, 2 and 3	previously sequenced at UKHSA
gas96189	M1UK	Blood culture	2015	UK	ERR12372556	PRJEB68199	Dataset 1, 2 and 3	previously sequenced at UKHSA
gas96193	26 SNPs	Blood culture	2015	UK	ERR12372557	PRJEB68199	Dataset 1, 2 and 3	previously sequenced at UKHSA
gas96197	M1UK	Blood culture	2015	UK	ERR12372558	PRJEB68199	Dataset 1, 2 and 3	previously sequenced at UKHSA
gas97733	M1UK	Blood culture	2015	UK	ERR12372559	PRJEB68199	Dataset 1, 2 and 3	previously sequenced at UKHSA
gas97735	M1UK	Blood culture	2015	UK	ERR12372560	PRJEB68199	Dataset 1, 2 and 3	previously sequenced at UKHSA
gas97736	M1UK	Blood culture	2015	UK	ERR12372561	PRJEB68199	Dataset 1, 2 and 3	previously sequenced at UKHSA
gas97738	M1UK	Blood culture	2015	UK	ERR12372562	PRJEB68199	Dataset 1, 2 and 3	previously sequenced at UKHSA
gas97744	M1Global	Blood culture	2015	UK	ERR12372563	PRJEB68199	Dataset 1 and 2	previously sequenced at UKHSA
gas97746	M1UK	Blood culture	2015	UK	ERR12372564	PRJEB68199	Dataset 1, 2 and 3	previously sequenced at UKHSA
gas97754	M1UK	Blood culture	2015	UK	ERR12372565	PRJEB68199	Dataset 1, 2 and 3	previously sequenced at UKHSA
gas97755	M1UK	Throat swab	2015	UK	ERR12372566	PRJEB68199	Dataset 1, 2 and 3	previously sequenced at UKHSA
gas97761	M1UK	Blood culture	2015	UK	ERR12372567	PRJEB68199	Dataset 1, 2 and 3	previously sequenced at UKHSA
gas97762	M1UK	Blood culture	2015	UK	ERR12372568	PRJEB68199	Dataset 1, 2 and 3	previously sequenced at UKHSA
gas97763	M1UK	Muscle tissue	2015	UK	ERR12372569	PRJEB68199	Dataset 1, 2 and 3	previously sequenced at UKHSA
gas97766	M1UK	Pus	2015	UK	ERR12372570	PRJEB68199	Dataset 1, 2 and 3	previously sequenced at UKHSA
gas97771	M1UK	Blood culture	2015	UK	ERR12372571	PRJEB68199	Dataset 1, 2 and 3	previously sequenced at UKHSA
gas97776	M1UK	Blood culture	2015	UK	ERR12372572	PRJEB68199	Dataset 1, 2 and 3	previously sequenced at UKHSA
gas97779	M1UK	Blood culture	2015	UK	ERR12372573	PRJEB68199	Dataset 1, 2 and 3	previously sequenced at UKHSA
gas97782	M1UK	Blood culture	2015	UK	ERR12372574	PRJEB68199	Dataset 1, 2 and 3	previously sequenced at UKHSA
gas97788	M1UK	Blood culture	2015	UK	ERR12372575	PRJEB68199	Dataset 1, 2 and 3	previously sequenced at UKHSA
gas97794	M1UK	Blood culture	2015	UK	ERR12372576	PRJEB68199	Dataset 1, 2 and 3	previously sequenced at UKHSA
gas97801	M1UK	Blood culture	2015	UK	ERR12372577	PRJEB68199	Dataset 1, 2 and 3	previously sequenced at UKHSA
gas97802	M1UK	Blood culture	2015	UK	ERR12372578	PRJEB68199	Dataset 1, 2 and 3	previously sequenced at UKHSA
gas1275927	M1UK	Blood culture	2020	UK	ERR12370892	PRJEB68199	Dataset 1, 2 and 3	Intermittently sequenced as part of UKHSA service delivery
gas1275928	M1UK	Synovial fluid	2020	UK	ERR12370893	PRJEB68199	Dataset 1, 2 and 3	Intermittently sequenced as part of UKHSA service delivery
gas1275929	M1UK	Blood culture	2020	UK	ERR12370894	PRJEB68199	Dataset 1, 2 and 3	Intermittently sequenced as part of UKHSA service delivery
gas1275930	M1UK	Blood culture	2020	UK	ERR12370895	PRJEB68199	Dataset 1, 2 and 3	Intermittently sequenced as part of UKHSA service delivery
gas1275931	M1UK	Blood culture	2020	UK	ERR12370896	PRJEB68199	Dataset 1, 2 and 3	Intermittently sequenced as part of UKHSA service delivery
gas1275932	M1UK	Blood culture	2020	UK	ERR12370897	PRJEB68199	Dataset 1, 2 and 3	Intermittently sequenced as part of UKHSA service delivery
gas1275933	M1UK	Blood culture	2020	UK	ERR12370898	PRJEB68199	Dataset 1, 2 and 3	Intermittently sequenced as part of UKHSA service delivery
gas1275934	M1UK	Blood culture	2020	UK	ERR12370899	PRJEB68199	Dataset 1, 2 and 3	Intermittently sequenced as part of UKHSA service delivery
gas1275935	M1UK	Blood culture	2020	UK	ERR12370900	PRJEB68199	Dataset 1, 2 and 3	Intermittently sequenced as part of UKHSA service delivery
gas1275936	M1UK	Blood culture	2021	UK	ERR12370901	PRJEB68199	Dataset 1, 2 and 3	Intermittently sequenced as part of UKHSA service delivery
gas1275937	M1UK	Blood culture	2020	UK	ERR12370902	PRJEB68199	Dataset 1, 2 and 3	Intermittently sequenced as part of UKHSA service delivery
gas1275938	M1UK	Blood culture	2021	UK	ERR12370903	PRJEB68199	Dataset 1, 2 and 3	Intermittently sequenced as part of UKHSA service delivery
gas1275939	M1UK	Blood culture	2020	UK	ERR12370904	PRJEB68199	Dataset 1, 2 and 3	Intermittently sequenced as part of UKHSA service delivery
gas1275940	M1UK	Throat swab	2021	UK	ERR12370905	PRJEB68199	Dataset 1, 2 and 3	Intermittently sequenced as part of UKHSA service delivery
gas1275941	M1UK	Blood culture	2020	UK	ERR12370906	PRJEB68199	Dataset 1, 2 and 3	Intermittently sequenced as part of UKHSA service delivery
gas1275942	M1UK	Blood culture	2020	UK	ERR12370907	PRJEB68199	Dataset 1, 2 and 3	Intermittently sequenced as part of UKHSA service delivery
gas1275943	M1UK	Blood culture	2020	UK	ERR12370908	PRJEB68199	Dataset 1, 2 and 3	Intermittently sequenced as part of UKHSA service delivery
gas1275944	M1UK	Blood culture	2020	UK	ERR12370909	PRJEB68199	Dataset 1, 2 and 3	Intermittently sequenced as part of UKHSA service delivery
gas1275945	M1UK	Blood culture	2020	UK	ERR12370910	PRJEB68199	Dataset 1, 2 and 3	Intermittently sequenced as part of UKHSA service delivery
gas1275946	M1UK	Blood culture	2020	UK	ERR12370911	PRJEB68199	Dataset 1, 2 and 3	Intermittently sequenced as part of UKHSA service delivery
gas1275947	M1Global	Blood culture	2020	UK	ERR12370912	PRJEB68199	Dataset 1 and 2	Intermittently sequenced as part of UKHSA service delivery
gas1275948	M1Global	Blood culture	2021	UK	ERR12370913	PRJEB68199	Dataset 1 and 2	Intermittently sequenced as part of UKHSA service delivery
gas1275949	M1UK	Fluid	2020	UK	ERR12370914	PRJEB68199	Dataset 1, 2 and 3	Intermittently sequenced as part of UKHSA service delivery
gas1275950	M1Global	Blood culture	2020	UK	ERR12370915	PRJEB68199	Dataset 1 and 2	Intermittently sequenced as part of UKHSA service delivery
gas1275951	M1Global	Blood culture	2020	UK	ERR12370916	PRJEB68199	Dataset 1 and 2	Intermittently sequenced as part of UKHSA service delivery
gas1275952	M1UK	Pleural fluid	2020	UK	ERR12370917	PRJEB68199	Dataset 1, 2 and 3	Intermittently sequenced as part of UKHSA service delivery
gas1275953	M1UK	Pleural fluid	2020	UK	ERR12370918	PRJEB68199	Dataset 1, 2 and 3	Intermittently sequenced as part of UKHSA service delivery
gas1275954	M1UK	Blood culture	2020	UK	ERR12370919	PRJEB68199	Dataset 1, 2 and 3	Intermittently sequenced as part of UKHSA service delivery
gas1275955	M1UK	Sputum	2020	UK	ERR12370920	PRJEB68199	Dataset 1, 2 and 3	Intermittently sequenced as part of UKHSA service delivery
gas1275956	M1UK	Blood culture	2021	UK	ERR12370921	PRJEB68199	Dataset 1, 2 and 3	Intermittently sequenced as part of UKHSA service delivery
gas1275957	M1UK	Blood culture	2020	UK	ERR12370922	PRJEB68199	Dataset 1, 2 and 3	Intermittently sequenced as part of UKHSA service delivery
gas1275958	M1UK	Blood culture	2020	UK	ERR12370923	PRJEB68199	Dataset 1, 2 and 3	Intermittently sequenced as part of UKHSA service delivery
gas1275959	M1UK	Blood culture	2020	UK	ERR12370924	PRJEB68199	Dataset 1, 2 and 3	Intermittently sequenced as part of UKHSA service delivery
gas1275960	M1UK	Blood culture	2020	UK	ERR12370925	PRJEB68199	Dataset 1, 2 and 3	Intermittently sequenced as part of UKHSA service delivery
gas1275961	M1UK	Blood culture	2020	UK	ERR12370926	PRJEB68199	Dataset 1, 2 and 3	Intermittently sequenced as part of UKHSA service delivery
gas1275962	M1UK	Blood culture	2020	UK	ERR12370927	PRJEB68199	Dataset 1, 2 and 3	Intermittently sequenced as part of UKHSA service delivery
gas1275963	M1UK	Blood culture	2020	UK	ERR12370928	PRJEB68199	Dataset 1, 2 and 3	Intermittently sequenced as part of UKHSA service delivery
gas1275964	M1UK	Blood culture	2020	UK	ERR12370929	PRJEB68199	Dataset 1, 2 and 3	Intermittently sequenced as part of UKHSA service delivery
gas1275965	M1UK	Blood culture	2020	UK	ERR12370930	PRJEB68199	Dataset 1, 2 and 3	Intermittently sequenced as part of UKHSA service delivery
gas1275966	M1UK	Swab	2020	UK	ERR12370931	PRJEB68199	Dataset 1, 2 and 3	Intermittently sequenced as part of UKHSA service delivery
gas1275967	M1UK	Blood culture	2020	UK	ERR12370932	PRJEB68199	Dataset 1, 2 and 3	Intermittently sequenced as part of UKHSA service delivery
gas1275968	M1UK	Blood culture	2020	UK	ERR12370933	PRJEB68199	Dataset 1, 2 and 3	Intermittently sequenced as part of UKHSA service delivery
gas1275969	M1UK	Ulcer	2020	UK	ERR12370934	PRJEB68199	Dataset 1, 2 and 3	Intermittently sequenced as part of UKHSA service delivery
gas1275970	M1UK	Blood culture	2020	UK	ERR12370935	PRJEB68199	Dataset 1, 2 and 3	Intermittently sequenced as part of UKHSA service delivery
gas1275971	M1UK	Blood culture	2020	UK	ERR12370936	PRJEB68199	Dataset 1, 2 and 3	Intermittently sequenced as part of UKHSA service delivery
gas1275972	M1UK	Blood culture	2020	UK	ERR12370937	PRJEB68199	Dataset 1, 2 and 3	Intermittently sequenced as part of UKHSA service delivery
gas1275973	M1UK	Blood culture	2020	UK	ERR12370938	PRJEB68199	Dataset 1, 2 and 3	Intermittently sequenced as part of UKHSA service delivery
gas1275974	M1UK	Blood culture	2020	UK	ERR12370939	PRJEB68199	Dataset 1, 2 and 3	Intermittently sequenced as part of UKHSA service delivery
gas1275975	M1UK	High vaginal swab	2020	UK	ERR12370940	PRJEB68199	Dataset 1, 2 and 3	Intermittently sequenced as part of UKHSA service delivery
gas1275976	M1UK	Blood culture	2020	UK	ERR12370941	PRJEB68199	Dataset 1, 2 and 3	Intermittently sequenced as part of UKHSA service delivery
gas1275977	M1UK	Blood culture	2020	UK	ERR12370942	PRJEB68199	Dataset 1, 2 and 3	Intermittently sequenced as part of UKHSA service delivery
gas1275978	M1UK	Blood culture	2021	UK	ERR12370943	PRJEB68199	Dataset 1, 2 and 3	Intermittently sequenced as part of UKHSA service delivery
gas1275979	M1UK	Swab	2020	UK	ERR12370944	PRJEB68199	Dataset 1, 2 and 3	Intermittently sequenced as part of UKHSA service delivery
gas1275980	M1UK	Blood culture	2020	UK	ERR12370945	PRJEB68199	Dataset 1, 2 and 3	Intermittently sequenced as part of UKHSA service delivery
gas1275981	M1UK	Blood culture	2020	UK	ERR12370946	PRJEB68199	Dataset 1, 2 and 3	Intermittently sequenced as part of UKHSA service delivery
gas1275982	M1UK	Blood culture	2020	UK	ERR12370947	PRJEB68199	Dataset 1, 2 and 3	Intermittently sequenced as part of UKHSA service delivery
gas1275983	M1UK	Blood culture	2020	UK	ERR12370948	PRJEB68199	Dataset 1, 2 and 3	Intermittently sequenced as part of UKHSA service delivery
gas1275984	M1UK	Fluid	2020	UK	ERR12370949	PRJEB68199	Dataset 1, 2 and 3	Intermittently sequenced as part of UKHSA service delivery
gas1275985	M1UK	Blood culture	2020	UK	ERR12370950	PRJEB68199	Dataset 1, 2 and 3	Intermittently sequenced as part of UKHSA service delivery
gas1275986	M1UK	Blood culture	2020	UK	ERR12370951	PRJEB68199	Dataset 1, 2 and 3	Intermittently sequenced as part of UKHSA service delivery
gas1275987	M1Global	Blood culture	2020	UK	ERR12370952	PRJEB68199	Dataset 1 and 2	Intermittently sequenced as part of UKHSA service delivery
gas1275988	M1UK	Blood culture	2020	UK	ERR12370953	PRJEB68199	Dataset 1, 2 and 3	Intermittently sequenced as part of UKHSA service delivery
gas1275989	M1UK	Blood culture	2020	UK	ERR12370954	PRJEB68199	Dataset 1, 2 and 3	Intermittently sequenced as part of UKHSA service delivery
gas1275990	M1UK	Blood culture	2020	UK	ERR12370955	PRJEB68199	Dataset 1, 2 and 3	Intermittently sequenced as part of UKHSA service delivery
gas1275991	M1UK	Blood culture	2020	UK	ERR12370956	PRJEB68199	Dataset 1, 2 and 3	Intermittently sequenced as part of UKHSA service delivery
gas1275992	M1UK	Pleural fluid	2020	UK	ERR12370957	PRJEB68199	Dataset 1, 2 and 3	Intermittently sequenced as part of UKHSA service delivery
gas1275993	M1UK	Blood culture	2020	UK	ERR12370958	PRJEB68199	Dataset 1, 2 and 3	Intermittently sequenced as part of UKHSA service delivery
gas1275994	M1UK	Blood culture	2020	UK	ERR12370959	PRJEB68199	Dataset 1, 2 and 3	Intermittently sequenced as part of UKHSA service delivery
gas1275995	M1UK	Blood culture	2020	UK	ERR12370960	PRJEB68199	Dataset 1, 2 and 3	Intermittently sequenced as part of UKHSA service delivery
gas1275996	M1UK	Blood culture	2020	UK	ERR12370961	PRJEB68199	Dataset 1, 2 and 3	Intermittently sequenced as part of UKHSA service delivery
gas1275997	M1UK	Blood culture	2020	UK	ERR12370962	PRJEB68199	Dataset 1, 2 and 3	Intermittently sequenced as part of UKHSA service delivery
gas1275998	M1UK	Blood culture	2021	UK	ERR12370963	PRJEB68199	Dataset 1, 2 and 3	Intermittently sequenced as part of UKHSA service delivery
gas1275999	M1UK	Blood culture	2021	UK	ERR12370964	PRJEB68199	Dataset 1, 2 and 3	Intermittently sequenced as part of UKHSA service delivery
gas1276000	M1UK	Blood culture	2020	UK	ERR12370965	PRJEB68199	Dataset 1, 2 and 3	Intermittently sequenced as part of UKHSA service delivery
gas1276001	26 SNPs	Blood culture	2021	UK	ERR12370966	PRJEB68199	Dataset 1, 2 and 3	Intermittently sequenced as part of UKHSA service delivery
gas1276002	M1UK	Swab	2020	UK	ERR12370967	PRJEB68199	Dataset 1, 2 and 3	Intermittently sequenced as part of UKHSA service delivery
gas1276003	M1UK	Blood culture	2020	UK	ERR12370968	PRJEB68199	Dataset 1, 2 and 3	Intermittently sequenced as part of UKHSA service delivery
gas1276004	M1Global	Blood culture	2020	UK	ERR12370969	PRJEB68199	Dataset 1 and 2	Intermittently sequenced as part of UKHSA service delivery
gas1276005	M1UK	Blood culture	2020	UK	ERR12370970	PRJEB68199	Dataset 1, 2 and 3	Intermittently sequenced as part of UKHSA service delivery
gas1276006	M1UK	Blood culture	2020	UK	ERR12370971	PRJEB68199	Dataset 1, 2 and 3	Intermittently sequenced as part of UKHSA service delivery
gas1276007	M1UK	Blood culture	2020	UK	ERR12370972	PRJEB68199	Dataset 1, 2 and 3	Intermittently sequenced as part of UKHSA service delivery
gas1276009	M1UK	Blood culture	2020	UK	ERR12370973	PRJEB68199	Dataset 1, 2 and 3	Intermittently sequenced as part of UKHSA service delivery
gas1276010	M1UK	Blood culture	2020	UK	ERR12370974	PRJEB68199	Dataset 1, 2 and 3	Intermittently sequenced as part of UKHSA service delivery
gas1276011	M1Global	Blood culture	2020	UK	ERR12370975	PRJEB68199	Dataset 1 and 2	Intermittently sequenced as part of UKHSA service delivery
gas1276012	M1UK	Swab	2020	UK	ERR12370976	PRJEB68199	Dataset 1, 2 and 3	Intermittently sequenced as part of UKHSA service delivery
gas1276013	M1UK	Blood culture	2020	UK	ERR12370977	PRJEB68199	Dataset 1, 2 and 3	Intermittently sequenced as part of UKHSA service delivery
gas1276014	M1UK	Blood culture	2020	UK	ERR12370978	PRJEB68199	Dataset 1, 2 and 3	Intermittently sequenced as part of UKHSA service delivery
gas1276015	M1UK	Blood culture	2021	UK	ERR12370979	PRJEB68199	Dataset 1, 2 and 3	Intermittently sequenced as part of UKHSA service delivery
gas1276016	M1UK	Blood culture	2021	UK	ERR12370980	PRJEB68199	Dataset 1, 2 and 3	Intermittently sequenced as part of UKHSA service delivery
gas1276017	M1UK	Blood culture	2020	UK	ERR12370981	PRJEB68199	Dataset 1, 2 and 3	Intermittently sequenced as part of UKHSA service delivery
gas1276018	M1UK	Blood culture	2020	UK	ERR12370982	PRJEB68199	Dataset 1, 2 and 3	Intermittently sequenced as part of UKHSA service delivery
gas1276020	M1UK	Blood culture	2020	UK	ERR12370983	PRJEB68199	Dataset 1, 2 and 3	Intermittently sequenced as part of UKHSA service delivery
gas1276021	M1UK	Throat swab	2021	UK	ERR12370984	PRJEB68199	Dataset 1, 2 and 3	Intermittently sequenced as part of UKHSA service delivery
gas1276022	M1UK	Blood culture	2020	UK	ERR12370985	PRJEB68199	Dataset 1, 2 and 3	Intermittently sequenced as part of UKHSA service delivery
gas1560505v1	M1UK	Blood culture	2021	UK	ERR12371009	PRJEB68199	Dataset 1, 2 and 3	Intermittently sequenced as part of UKHSA service delivery
gas1561252v1	M1UK	Wound swab (joint)	2021	UK	ERR12371010	PRJEB68199	Dataset 1, 2 and 3	Intermittently sequenced as part of UKHSA service delivery
gas1686021	M1UK	Blood culture	2021	UK	ERR12371020	PRJEB68199	Dataset 1, 2 and 3	Intermittently sequenced as part of UKHSA service delivery
gas1686025	M1UK	Pleural fluid	2021	UK	ERR12371021	PRJEB68199	Dataset 1, 2 and 3	Intermittently sequenced as part of UKHSA service delivery
gas364064	M1UK	Blood culture	2016	UK	ERR12372200	PRJEB68199	Dataset 1, 2 and 3	Intermittently sequenced as part of UKHSA service delivery
gas364065	M1Global	Blood culture	2016	UK	ERR12372201	PRJEB68199	Dataset 1 and 2	Intermittently sequenced as part of UKHSA service delivery
gas364066	M1UK	Other	2017	UK	ERR12372202	PRJEB68199	Dataset 1, 2 and 3	Intermittently sequenced as part of UKHSA service delivery
gas364067	M1Global	Blood culture	2017	UK	ERR12372203	PRJEB68199	Dataset 1 and 2	Intermittently sequenced as part of UKHSA service delivery
gas364068	M1Global	Blood culture	2017	UK	ERR12372204	PRJEB68199	Dataset 1 and 2	Intermittently sequenced as part of UKHSA service delivery
gas364069	M1UK	Fluid	2017	UK	ERR12372205	PRJEB68199	Dataset 1, 2 and 3	Intermittently sequenced as part of UKHSA service delivery
gas364070	M1UK	High vaginal swab	2017	UK	ERR12372206	PRJEB68199	Dataset 1, 2 and 3	Intermittently sequenced as part of UKHSA service delivery
gas364071	M1UK	Vaginal swab	2017	UK	ERR12372207	PRJEB68199	Dataset 1, 2 and 3	Intermittently sequenced as part of UKHSA service delivery
gas364072	M1UK	Vaginal swab	2017	UK	ERR12372208	PRJEB68199	Dataset 1, 2 and 3	Intermittently sequenced as part of UKHSA service delivery
gas392684	M1Global	Blood culture	2016	UK	ERR12372245	PRJEB68199	Dataset 1 and 2	Intermittently sequenced as part of UKHSA service delivery
gas392685	M1UK	Blood culture	2017	UK	ERR12372246	PRJEB68199	Dataset 1, 2 and 3	Intermittently sequenced as part of UKHSA service delivery
gas392686	M1Global	Blood culture	2017	UK	ERR12372247	PRJEB68199	Dataset 1 and 2	Intermittently sequenced as part of UKHSA service delivery
gas392687	M1UK	Blood culture	2017	UK	ERR12372248	PRJEB68199	Dataset 1, 2 and 3	Intermittently sequenced as part of UKHSA service delivery
gas392688	M1UK	Blood culture	2017	UK	ERR12372249	PRJEB68199	Dataset 1, 2 and 3	Intermittently sequenced as part of UKHSA service delivery
gas392689	M1UK	Blood culture	2017	UK	ERR12372250	PRJEB68199	Dataset 1, 2 and 3	Intermittently sequenced as part of UKHSA service delivery
gas392690	M1Global	Blood culture	2017	UK	ERR12372251	PRJEB68199	Dataset 1 and 2	Intermittently sequenced as part of UKHSA service delivery
gas392691	M1UK	Blood culture	2017	UK	ERR12372252	PRJEB68199	Dataset 1, 2 and 3	Intermittently sequenced as part of UKHSA service delivery
gas392692	M1UK	Blood culture	2017	UK	ERR12372253	PRJEB68199	Dataset 1, 2 and 3	Intermittently sequenced as part of UKHSA service delivery
gas392693	M1UK	Blood culture	2017	UK	ERR12372254	PRJEB68199	Dataset 1, 2 and 3	Intermittently sequenced as part of UKHSA service delivery
gas392694	M1UK	Blood culture	2017	UK	ERR12372255	PRJEB68199	Dataset 1, 2 and 3	Intermittently sequenced as part of UKHSA service delivery
gas392695	M1UK	Blood culture	2017	UK	ERR12372256	PRJEB68199	Dataset 1, 2 and 3	Intermittently sequenced as part of UKHSA service delivery
gas392696	M1Global	Blood culture	2017	UK	ERR12372257	PRJEB68199	Dataset 1 and 2	Intermittently sequenced as part of UKHSA service delivery
gas392697	M1UK	Blood culture	2017	UK	ERR12372258	PRJEB68199	Dataset 1, 2 and 3	Intermittently sequenced as part of UKHSA service delivery
gas392698	M1UK	Blood culture	2017	UK	ERR12372259	PRJEB68199	Dataset 1, 2 and 3	Intermittently sequenced as part of UKHSA service delivery
gas392699	M1UK	Blood culture	2017	UK	ERR12372260	PRJEB68199	Dataset 1, 2 and 3	Intermittently sequenced as part of UKHSA service delivery
gas392700	M1UK	Blood culture	2017	UK	ERR12372261	PRJEB68199	Dataset 1, 2 and 3	Intermittently sequenced as part of UKHSA service delivery
gas392701	23SNPs	Blood culture	2017	UK	ERR12372262	PRJEB68199	Dataset 1, 2 and 3	Intermittently sequenced as part of UKHSA service delivery
gas392702	23SNPs	Throat swab	2017	UK	ERR12372263	PRJEB68199	Dataset 1, 2 and 3	Intermittently sequenced as part of UKHSA service delivery
gas392703	23SNPs	Throat swab	2017	UK	ERR12372264	PRJEB68199	Dataset 1, 2 and 3	Intermittently sequenced as part of UKHSA service delivery
gas392704	23SNPs	Throat swab	2017	UK	ERR12372265	PRJEB68199	Dataset 1, 2 and 3	Intermittently sequenced as part of UKHSA service delivery
gas392705	23SNPs	Throat swab	2017	UK	ERR12372266	PRJEB68199	Dataset 1, 2 and 3	Intermittently sequenced as part of UKHSA service delivery
gas392706	23SNPs	Throat swab	2017	UK	ERR12372267	PRJEB68199	Dataset 1, 2 and 3	Intermittently sequenced as part of UKHSA service delivery
gas491303	M1Global	Blood culture	2017	UK	ERR12372285	PRJEB68199	Dataset 1 and 2	Intermittently sequenced as part of UKHSA service delivery
gas491304	M1Global	Blood culture	2017	UK	ERR12372286	PRJEB68199	Dataset 1 and 2	Intermittently sequenced as part of UKHSA service delivery
gas491305	M1UK	Ear swab	2017	UK	ERR12372287	PRJEB68199	Dataset 1, 2 and 3	Intermittently sequenced as part of UKHSA service delivery
gas491306	M1UK	Blood culture	2017	UK	ERR12372288	PRJEB68199	Dataset 1, 2 and 3	Intermittently sequenced as part of UKHSA service delivery
gas491307	M1UK	Blood culture	2017	UK	ERR12372289	PRJEB68199	Dataset 1, 2 and 3	Intermittently sequenced as part of UKHSA service delivery
gas491309	M1UK	Aspirate (joint)	2018	UK	ERR12372290	PRJEB68199	Dataset 1, 2 and 3	Intermittently sequenced as part of UKHSA service delivery
gas491310	M1Global	Blood culture	2018	UK	ERR12372291	PRJEB68199	Dataset 1 and 2	Intermittently sequenced as part of UKHSA service delivery
gas498837	M1UK	Blood culture	2018	UK	ERR12372292	PRJEB68199	Dataset 1, 2 and 3	Intermittently sequenced as part of UKHSA service delivery
gas498838	M1UK	Throat swab	2018	UK	ERR12372293	PRJEB68199	Dataset 1, 2 and 3	Intermittently sequenced as part of UKHSA service delivery
gas526216	M1UK	Blood culture	2018	UK	ERR12372294	PRJEB68199	Dataset 1, 2 and 3	Intermittently sequenced as part of UKHSA service delivery
gas526218	M1UK	Blood culture	2018	UK	ERR12372295	PRJEB68199	Dataset 1, 2 and 3	Intermittently sequenced as part of UKHSA service delivery
gas536981	M1UK	Blood culture	2018	UK	ERR12372296	PRJEB68199	Dataset 1, 2 and 3	Intermittently sequenced as part of UKHSA service delivery
gas536988	M1UK	Wound swab	2018	UK	ERR12372297	PRJEB68199	Dataset 1, 2 and 3	Intermittently sequenced as part of UKHSA service delivery
gas584561	M1UK	Blood culture	2018	UK	ERR12372331	PRJEB68199	Dataset 1, 2 and 3	Intermittently sequenced as part of UKHSA service delivery
gas584562	M1UK	Blood culture	2018	UK	ERR12372332	PRJEB68199	Dataset 1, 2 and 3	Intermittently sequenced as part of UKHSA service delivery
gas584563	M1Global	Blood culture	2018	UK	ERR12372333	PRJEB68199	Dataset 1 and 2	Intermittently sequenced as part of UKHSA service delivery
gas584564	M1UK	Bronchial washings	2018	UK	ERR12372334	PRJEB68199	Dataset 1, 2 and 3	Intermittently sequenced as part of UKHSA service delivery
gas584565	M1UK	Blood culture	2018	UK	ERR12372335	PRJEB68199	Dataset 1, 2 and 3	Intermittently sequenced as part of UKHSA service delivery
gas584567	M1UK	Blood culture	2018	UK	ERR12372336	PRJEB68199	Dataset 1, 2 and 3	Intermittently sequenced as part of UKHSA service delivery
gas584571	M1UK	Tissue	2018	UK	ERR12372337	PRJEB68199	Dataset 1, 2 and 3	Intermittently sequenced as part of UKHSA service delivery
gas584594	M1UK	Blood culture	2018	UK	ERR12372338	PRJEB68199	Dataset 1, 2 and 3	Intermittently sequenced as part of UKHSA service delivery
gas584602	M1UK	Blood culture	2018	UK	ERR12372339	PRJEB68199	Dataset 1, 2 and 3	Intermittently sequenced as part of UKHSA service delivery
gas584604	M1UK	Blood culture	2018	UK	ERR12372340	PRJEB68199	Dataset 1, 2 and 3	Intermittently sequenced as part of UKHSA service delivery
gas584608	M1Global	Blood culture	2018	UK	ERR12372341	PRJEB68199	Dataset 1 and 2	Intermittently sequenced as part of UKHSA service delivery
gas584610	M1UK	Tissue	2018	UK	ERR12372342	PRJEB68199	Dataset 1, 2 and 3	Intermittently sequenced as part of UKHSA service delivery
gas584612	M1UK	Blood culture	2018	UK	ERR12372343	PRJEB68199	Dataset 1, 2 and 3	Intermittently sequenced as part of UKHSA service delivery
gas584616	M1UK	Ulcer	2018	UK	ERR12372344	PRJEB68199	Dataset 1, 2 and 3	Intermittently sequenced as part of UKHSA service delivery
gas605819	M1UK	Blood culture	2018	UK	ERR12372350	PRJEB68199	Dataset 1, 2 and 3	Intermittently sequenced as part of UKHSA service delivery
gas646155	M1UK	Blood culture	2018	UK	ERR12372352	PRJEB68199	Dataset 1, 2 and 3	Intermittently sequenced as part of UKHSA service delivery
gas646156	M1UK	Blood culture	2018	UK	ERR12372353	PRJEB68199	Dataset 1, 2 and 3	Intermittently sequenced as part of UKHSA service delivery
gas646157	M1UK	Blood culture	2018	UK	ERR12372354	PRJEB68199	Dataset 1, 2 and 3	Intermittently sequenced as part of UKHSA service delivery
gas646158	M1UK	Blood culture	2018	UK	ERR12372355	PRJEB68199	Dataset 1, 2 and 3	Intermittently sequenced as part of UKHSA service delivery
gas646159	M1UK	Blood culture	2018	UK	ERR12372356	PRJEB68199	Dataset 1, 2 and 3	Intermittently sequenced as part of UKHSA service delivery
gas646161	M1UK	Blood culture	2018	UK	ERR12372357	PRJEB68199	Dataset 1, 2 and 3	Intermittently sequenced as part of UKHSA service delivery
gas646162	M1UK	Blood culture	2018	UK	ERR12372358	PRJEB68199	Dataset 1, 2 and 3	Intermittently sequenced as part of UKHSA service delivery
gas646163	M1UK	Blood culture	2018	UK	ERR12372359	PRJEB68199	Dataset 1, 2 and 3	Intermittently sequenced as part of UKHSA service delivery
gas646164	M1UK	Blood culture	2018	UK	ERR12372360	PRJEB68199	Dataset 1, 2 and 3	Intermittently sequenced as part of UKHSA service delivery
gas646165	M1UK	Blood culture	2018	UK	ERR12372361	PRJEB68199	Dataset 1, 2 and 3	Intermittently sequenced as part of UKHSA service delivery
gas646166	M1Global	Blood culture	2018	UK	ERR12372362	PRJEB68199	Dataset 1 and 2	Intermittently sequenced as part of UKHSA service delivery
gas646167	M1UK	Blood culture	2018	UK	ERR12372363	PRJEB68199	Dataset 1, 2 and 3	Intermittently sequenced as part of UKHSA service delivery
gas646168	M1UK	Blood culture	2018	UK	ERR12372364	PRJEB68199	Dataset 1, 2 and 3	Intermittently sequenced as part of UKHSA service delivery
gas646169	M1UK	Blood culture	2018	UK	ERR12372365	PRJEB68199	Dataset 1, 2 and 3	Intermittently sequenced as part of UKHSA service delivery
gas646170	M1UK	Blood culture	2018	UK	ERR12372366	PRJEB68199	Dataset 1, 2 and 3	Intermittently sequenced as part of UKHSA service delivery
gas655341	M1UK	Wound swab	2018	UK	ERR12372370	PRJEB68199	Dataset 1, 2 and 3	Intermittently sequenced as part of UKHSA service delivery
gas705155v2	M1UK	Blood culture	2017	UK	ERR12372395	PRJEB68199	Dataset 1, 2 and 3	Intermittently sequenced as part of UKHSA service delivery
gas705157v2	M1UK	Blood culture	2017	UK	ERR12372396	PRJEB68199	Dataset 1, 2 and 3	Intermittently sequenced as part of UKHSA service delivery
gas705162v2	M1UK	Blood culture	2018	UK	ERR12372397	PRJEB68199	Dataset 1, 2 and 3	Intermittently sequenced as part of UKHSA service delivery
gas705164v2	M1UK	Blood culture	2018	UK	ERR12372398	PRJEB68199	Dataset 1, 2 and 3	Intermittently sequenced as part of UKHSA service delivery
gas705167v2	M1UK	Blood	2018	UK	ERR12372399	PRJEB68199	Dataset 1, 2 and 3	Intermittently sequenced as part of UKHSA service delivery
gas705172v2	M1UK	Blood culture	2018	UK	ERR12372400	PRJEB68199	Dataset 1, 2 and 3	Intermittently sequenced as part of UKHSA service delivery
gas705177v2	M1Global	Blood culture	2018	UK	ERR12372401	PRJEB68199	Dataset 1 and 2	Intermittently sequenced as part of UKHSA service delivery
gas705276v2	M1UK	Blood culture	2019	UK	ERR12372402	PRJEB68199	Dataset 1, 2 and 3	Intermittently sequenced as part of UKHSA service delivery
gas956148v2	M1UK	Blood culture	2019	UK	ERR12372508	PRJEB68199	Dataset 1, 2 and 3	Intermittently sequenced as part of UKHSA service delivery
gas956150v2	M1Global	Blood culture	2019	UK	ERR12372509	PRJEB68199	Dataset 1 and 2	Intermittently sequenced as part of UKHSA service delivery
gas956153v2	M1UK	Blood culture	2019	UK	ERR12372510	PRJEB68199	Dataset 1, 2 and 3	Intermittently sequenced as part of UKHSA service delivery
gas956156v2	M1UK	Blood culture	2019	UK	ERR12372511	PRJEB68199	Dataset 1, 2 and 3	Intermittently sequenced as part of UKHSA service delivery
gas956157v2	M1UK	Blood culture	2019	UK	ERR12372512	PRJEB68199	Dataset 1, 2 and 3	Intermittently sequenced as part of UKHSA service delivery
gas956160v2	M1Global	Blood culture	2019	UK	ERR12372513	PRJEB68199	Dataset 1 and 2	Intermittently sequenced as part of UKHSA service delivery
gas956162v2	M1UK	Blood culture	2019	UK	ERR12372514	PRJEB68199	Dataset 1, 2 and 3	Intermittently sequenced as part of UKHSA service delivery
gas956169v2	M1UK	Blood culture	2019	UK	ERR12372515	PRJEB68199	Dataset 1, 2 and 3	Intermittently sequenced as part of UKHSA service delivery
gas956171v2	M1UK	Blood culture	2019	UK	ERR12372516	PRJEB68199	Dataset 1, 2 and 3	Intermittently sequenced as part of UKHSA service delivery
gas956172v1	M1Global	Blood culture	2019	UK	ERR12372517	PRJEB68199	Dataset 1 and 2	Intermittently sequenced as part of UKHSA service delivery
gas956173v2	M1UK	Blood culture	2019	UK	ERR12372518	PRJEB68199	Dataset 1, 2 and 3	Intermittently sequenced as part of UKHSA service delivery
gas956174v1	M1Global	Blood culture	2019	UK	ERR12372519	PRJEB68199	Dataset 1 and 2	Intermittently sequenced as part of UKHSA service delivery
gas956178v2	M1UK	Blood culture	2019	UK	ERR12372520	PRJEB68199	Dataset 1, 2 and 3	Intermittently sequenced as part of UKHSA service delivery
gas956180v2	M1UK	Blood culture	2019	UK	ERR12372521	PRJEB68199	Dataset 1, 2 and 3	Intermittently sequenced as part of UKHSA service delivery
gas956181v2	M1UK	Blood culture	2019	UK	ERR12372522	PRJEB68199	Dataset 1, 2 and 3	Intermittently sequenced as part of UKHSA service delivery
gas956185v2	M1UK	Blood	2019	UK	ERR12372523	PRJEB68199	Dataset 1, 2 and 3	Intermittently sequenced as part of UKHSA service delivery
gas956187v2	M1UK	Blood culture	2019	UK	ERR12372524	PRJEB68199	Dataset 1, 2 and 3	Intermittently sequenced as part of UKHSA service delivery
gas956189v2	M1UK	Blood culture	2019	UK	ERR12372525	PRJEB68199	Dataset 1, 2 and 3	Intermittently sequenced as part of UKHSA service delivery
gas956198v2	M1UK	Blood culture	2019	UK	ERR12372526	PRJEB68199	Dataset 1, 2 and 3	Intermittently sequenced as part of UKHSA service delivery
gas956204v2	M1UK	Blood culture	2019	UK	ERR12372527	PRJEB68199	Dataset 1, 2 and 3	Intermittently sequenced as part of UKHSA service delivery
gas956206v2	M1UK	Joint	2019	UK	ERR12372528	PRJEB68199	Dataset 1, 2 and 3	Intermittently sequenced as part of UKHSA service delivery
gas956213v2	M1UK	Blood culture	2019	UK	ERR12372529	PRJEB68199	Dataset 1, 2 and 3	Intermittently sequenced as part of UKHSA service delivery
gas956217v2	M1UK	Blood culture	2019	UK	ERR12372530	PRJEB68199	Dataset 1, 2 and 3	Intermittently sequenced as part of UKHSA service delivery
gas956220v2	M1UK	Blood culture	2019	UK	ERR12372531	PRJEB68199	Dataset 1, 2 and 3	Intermittently sequenced as part of UKHSA service delivery
gas956235v2	M1UK	Blood culture	2019	UK	ERR12372532	PRJEB68199	Dataset 1, 2 and 3	Intermittently sequenced as part of UKHSA service delivery
gas1644917	M1UK	Chest drain	2022	UK	ERR12371011	PRJEB68199	Dataset 1, 2 and 3	This study
gas1644938	M1UK	Blood culture	2022	UK	ERR12371012	PRJEB68199	Dataset 1, 2 and 3	This study
gas1644992	M1UK	Fluid	2022	UK	ERR12371013	PRJEB68199	Dataset 1, 2 and 3	This study
gas1669979	26 SNPs	Throat swab	2022	UK	ERR12371014	PRJEB68199	Dataset 1, 2 and 3	This study
gas1669987	26 SNPs	Blood culture	2022	UK	ERR12371015	PRJEB68199	Dataset 1, 2 and 3	This study
gas1675216	26 SNPs	Throat swab	2022	UK	ERR12371016	PRJEB68199	Dataset 1, 2 and 3	This study
gas1675222	26 SNPs	Throat swab	2022	UK	ERR12371017	PRJEB68199	Dataset 1, 2 and 3	This study
gas1675229	26 SNPs	Ear swab	2022	UK	ERR12371018	PRJEB68199	Dataset 1, 2 and 3	This study
gas1675239	26 SNPs	Throat swab	2022	UK	ERR12371019	PRJEB68199	Dataset 1, 2 and 3	This study
gas1686027	26 SNPs	Tissue	2022	UK	ERR12371022	PRJEB68199	Dataset 1, 2 and 3	This study
gas1686029	M1UK	Blood culture	2022	UK	ERR12371023	PRJEB68199	Dataset 1, 2 and 3	This study
gas1686031	M1UK	Blood culture	2022	UK	ERR12371024	PRJEB68199	Dataset 1, 2 and 3	This study
gas1686039	M1UK	Blood culture	2022	UK	ERR12371025	PRJEB68199	Dataset 1, 2 and 3	This study
gas1686040	M1UK	Blood culture	2022	UK	ERR12371026	PRJEB68199	Dataset 1, 2 and 3	This study
gas1686042	M1UK	Blood culture	2022	UK	ERR12371027	PRJEB68199	Dataset 1, 2 and 3	This study
gas1686049	M1UK	Csf	2022	UK	ERR12371028	PRJEB68199	Dataset 1, 2 and 3	This study
gas1686052	26 SNPs	Blood culture	2022	UK	ERR12371029	PRJEB68199	Dataset 1, 2 and 3	This study
gas1686055	M1UK	Blood culture	2022	UK	ERR12371030	PRJEB68199	Dataset 1, 2 and 3	This study
gas1686057	M1UK	Blood culture	2022	UK	ERR12371031	PRJEB68199	Dataset 1, 2 and 3	This study
gas1686058	M1UK	Blood culture	2022	UK	ERR12371032	PRJEB68199	Dataset 1, 2 and 3	This study
gas1686068	M1UK	Blood culture	2022	UK	ERR12371033	PRJEB68199	Dataset 1, 2 and 3	This study
gas1686069	M1UK	Blood culture	2022	UK	ERR12371034	PRJEB68199	Dataset 1, 2 and 3	This study
gas1686071	M1UK	Blood culture	2022	UK	ERR12371035	PRJEB68199	Dataset 1, 2 and 3	This study
gas1686072	M1UK	Blood culture	2022	UK	ERR12371036	PRJEB68199	Dataset 1, 2 and 3	This study
gas1686073	M1UK	Pleural fluid	2022	UK	ERR12371037	PRJEB68199	Dataset 1, 2 and 3	This study
gas1686076	M1UK	Blood culture	2022	UK	ERR12371038	PRJEB68199	Dataset 1, 2 and 3	This study
gas1686083	M1UK	Blood culture	2022	UK	ERR12371039	PRJEB68199	Dataset 1, 2 and 3	This study
gas1686087	M1UK	Blood culture	2022	UK	ERR12371040	PRJEB68199	Dataset 1, 2 and 3	This study
gas1692217	M1Global	Blood culture	2022	UK	ERR12371041	PRJEB68199	Dataset 1 and 2	This study
gas1692221	M1UK	Blood culture	2022	UK	ERR12371042	PRJEB68199	Dataset 1, 2 and 3	This study
gas1692223	M1UK	Blood culture	2022	UK	ERR12371043	PRJEB68199	Dataset 1, 2 and 3	This study
gas1692229	M1UK	Blood culture	2022	UK	ERR12371044	PRJEB68199	Dataset 1, 2 and 3	This study
gas1692230	M1UK	Blood culture	2022	UK	ERR12371045	PRJEB68199	Dataset 1, 2 and 3	This study
gas1692234	M1UK	Blood culture	2022	UK	ERR12371046	PRJEB68199	Dataset 1, 2 and 3	This study
gas1692235	M1UK	Blood culture	2022	UK	ERR12371047	PRJEB68199	Dataset 1, 2 and 3	This study
gas1692242	M1UK	Blood culture	2022	UK	ERR12371048	PRJEB68199	Dataset 1, 2 and 3	This study
gas1692246	M1UK	Blood culture	2022	UK	ERR12371049	PRJEB68199	Dataset 1, 2 and 3	This study
gas1692250	M1UK	Blood culture	2022	UK	ERR12371050	PRJEB68199	Dataset 1, 2 and 3	This study
gas1692251	M1UK	Pleural fluid	2022	UK	ERR12371051	PRJEB68199	Dataset 1, 2 and 3	This study
gas1692252	M1UK	Blood culture	2022	UK	ERR12371052	PRJEB68199	Dataset 1, 2 and 3	This study
gas1692253	M1UK	Blood culture	2022	UK	ERR12371053	PRJEB68199	Dataset 1, 2 and 3	This study
gas1692255	M1UK	Blood culture	2022	UK	ERR12371054	PRJEB68199	Dataset 1, 2 and 3	This study
gas1692256	M1UK	Blood culture	2022	UK	ERR12371055	PRJEB68199	Dataset 1, 2 and 3	This study
gas1692258	M1UK	Blood culture	2022	UK	ERR12371056	PRJEB68199	Dataset 1, 2 and 3	This study
gas1692259	M1UK	Knee aspirate	2022	UK	ERR12371057	PRJEB68199	Dataset 1, 2 and 3	This study
gas1692261	M1UK	Csf	2022	UK	ERR12371058	PRJEB68199	Dataset 1, 2 and 3	This study
gas1692262	M1UK	Blood culture	2022	UK	ERR12371059	PRJEB68199	Dataset 1, 2 and 3	This study
gas1692264	M1Global	Blood culture	2022	UK	ERR12371060	PRJEB68199	Dataset 1 and 2	This study
gas1692266	M1UK	Pleural fluid	2022	UK	ERR12371061	PRJEB68199	Dataset 1, 2 and 3	This study
gas1692269	M1UK	Blood culture	2022	UK	ERR12371062	PRJEB68199	Dataset 1, 2 and 3	This study
gas1692273	M1UK	Tissue	2022	UK	ERR12371063	PRJEB68199	Dataset 1, 2 and 3	This study
gas1692279	M1UK	Blood culture	2022	UK	ERR12371064	PRJEB68199	Dataset 1, 2 and 3	This study
gas1692283	M1UK	Blood culture	2022	UK	ERR12371065	PRJEB68199	Dataset 1, 2 and 3	This study
gas1692286	M1UK	Blood culture	2022	UK	ERR12371066	PRJEB68199	Dataset 1, 2 and 3	This study
gas1692287	M1UK	Pleural fluid	2022	UK	ERR12371067	PRJEB68199	Dataset 1, 2 and 3	This study
gas1696140	M1UK	Blood	2022	UK	ERR12371068	PRJEB68199	Dataset 1, 2 and 3	This study
gas1696144	M1UK	Blood culture	2022	UK	ERR12371069	PRJEB68199	Dataset 1, 2 and 3	This study
gas1696147	M1UK	Blood culture	2022	UK	ERR12371070	PRJEB68199	Dataset 1, 2 and 3	This study
gas1696150	M1UK	Blood culture	2022	UK	ERR12371071	PRJEB68199	Dataset 1, 2 and 3	This study
gas1696152	M1UK	Blood culture	2022	UK	ERR12371072	PRJEB68199	Dataset 1, 2 and 3	This study
gas1696160	M1UK	Blood culture	2022	UK	ERR12371073	PRJEB68199	Dataset 1, 2 and 3	This study
gas1696162	M1UK	Blood culture	2022	UK	ERR12371074	PRJEB68199	Dataset 1, 2 and 3	This study
gas1696163	M1UK	Blood culture	2022	UK	ERR12371075	PRJEB68199	Dataset 1, 2 and 3	This study
gas1696164	M1UK	Post mortem blood	2022	UK	ERR12371076	PRJEB68199	Dataset 1, 2 and 3	This study
gas1696165	M1UK	Csf	2022	UK	ERR12371077	PRJEB68199	Dataset 1, 2 and 3	This study
gas1696169	M1UK	Blood culture	2022	UK	ERR12371078	PRJEB68199	Dataset 1, 2 and 3	This study
gas1696170	M1UK	Blood culture	2022	UK	ERR12371079	PRJEB68199	Dataset 1, 2 and 3	This study
gas1696176	M1UK	Blood	2022	UK	ERR12371080	PRJEB68199	Dataset 1, 2 and 3	This study
gas1696177	M1Global	Blood culture	2022	UK	ERR12371081	PRJEB68199	Dataset 1 and 2	This study
gas1696178	M1UK	Blood culture	2022	UK	ERR12371082	PRJEB68199	Dataset 1, 2 and 3	This study
gas1696184	M1UK	Abscess	2022	UK	ERR12371083	PRJEB68199	Dataset 1, 2 and 3	This study
gas1696192	M1UK	Fluid	2022	UK	ERR12371084	PRJEB68199	Dataset 1, 2 and 3	This study
gas1696195	M1UK	Pleural fluid	2022	UK	ERR12371085	PRJEB68199	Dataset 1, 2 and 3	This study
gas1696197	M1UK	Blood culture	2022	UK	ERR12371086	PRJEB68199	Dataset 1, 2 and 3	This study
gas1696198	M1UK	Blood culture	2022	UK	ERR12371087	PRJEB68199	Dataset 1, 2 and 3	This study
gas1696205	M1UK	Blood culture	2022	UK	ERR12371088	PRJEB68199	Dataset 1, 2 and 3	This study
gas1696207	M1UK	Pleural fluid	2022	UK	ERR12371089	PRJEB68199	Dataset 1, 2 and 3	This study
gas1696209	M1UK	Blood culture	2022	UK	ERR12371090	PRJEB68199	Dataset 1, 2 and 3	This study
gas1696210	M1UK	Blood culture	2022	UK	ERR12371091	PRJEB68199	Dataset 1, 2 and 3	This study
gas1698664	M1UK	Aspirate	2022	UK	ERR12371092	PRJEB68199	Dataset 1, 2 and 3	This study
gas1698670	M1Global	Blood culture	2022	UK	ERR12371093	PRJEB68199	Dataset 1 and 2	This study
gas1698677	M1UK	Blood culture	2022	UK	ERR12371094	PRJEB68199	Dataset 1, 2 and 3	This study
gas1709470	M1UK	Blood culture	2022	UK	ERR12371095	PRJEB68199	Dataset 1, 2 and 3	This study
gas1709488	M1UK	Blood culture	2022	UK	ERR12371096	PRJEB68199	Dataset 1, 2 and 3	This study
gas1709492	M1UK	Blood culture	2022	UK	ERR12371097	PRJEB68199	Dataset 1, 2 and 3	This study
gas1709502	M1UK	Blood culture	2022	UK	ERR12371098	PRJEB68199	Dataset 1, 2 and 3	This study
gas1709508	M1UK	Blood culture	2022	UK	ERR12371099	PRJEB68199	Dataset 1, 2 and 3	This study
gas1709514	M1UK	Blood culture	2022	UK	ERR12371100	PRJEB68199	Dataset 1, 2 and 3	This study
gas1709518	M1UK	Abscess	2022	UK	ERR12371101	PRJEB68199	Dataset 1, 2 and 3	This study
gas1709524	M1UK	Blood culture	2022	UK	ERR12371102	PRJEB68199	Dataset 1, 2 and 3	This study
gas1709542	M1UK	Blood culture	2022	UK	ERR12371103	PRJEB68199	Dataset 1, 2 and 3	This study
gas1709546	M1UK	Blood culture	2022	UK	ERR12371104	PRJEB68199	Dataset 1, 2 and 3	This study
gas1710506	M1UK	Tissue	2022	UK	ERR12371105	PRJEB68199	Dataset 1, 2 and 3	This study
gas1710507	M1UK	Wound swab	2022	UK	ERR12371106	PRJEB68199	Dataset 1, 2 and 3	This study
gas1710537	M1UK	Nose	2022	UK	ERR12371107	PRJEB68199	Dataset 1, 2 and 3	This study
gas1711777	M1UK	Tissue	2022	UK	ERR12371108	PRJEB68199	Dataset 1, 2 and 3	This study
gas1716146	M1UK	Blood culture	2022	UK	ERR12371109	PRJEB68199	Dataset 1, 2 and 3	This study
gas1716158	26 SNPs	Blood culture	2022	UK	ERR12371110	PRJEB68199	Dataset 1, 2 and 3	This study
gas1716160	M1UK	Blood culture	2022	UK	ERR12371111	PRJEB68199	Dataset 1, 2 and 3	This study
gas1716162	M1UK	Wound swab	2022	UK	ERR12371112	PRJEB68199	Dataset 1, 2 and 3	This study
gas1716167	M1UK	Vaginal swab	2022	UK	ERR12371113	PRJEB68199	Dataset 1, 2 and 3	This study
gas1716178	M1UK	Peritoneal fluid	2022	UK	ERR12371114	PRJEB68199	Dataset 1, 2 and 3	This study
gas1716181	M1UK	Blood culture	2022	UK	ERR12371115	PRJEB68199	Dataset 1, 2 and 3	This study
gas1716204	M1UK	Blood culture	2022	UK	ERR12371116	PRJEB68199	Dataset 1, 2 and 3	This study
gas1717759	M1UK	Blood	2022	UK	ERR12371117	PRJEB68199	Dataset 1, 2 and 3	This study
gas1717767	M1UK	Blood culture	2022	UK	ERR12371118	PRJEB68199	Dataset 1, 2 and 3	This study
gas1717784	M1UK	Blood culture	2022	UK	ERR12371119	PRJEB68199	Dataset 1, 2 and 3	This study
gas1717800	M1UK	Blood culture	2022	UK	ERR12371120	PRJEB68199	Dataset 1, 2 and 3	This study
gas1717807	M1UK	Blood culture	2022	UK	ERR12371121	PRJEB68199	Dataset 1, 2 and 3	This study
gas1717833	M1UK	Information not provided	2022	UK	ERR12371122	PRJEB68199	Dataset 1, 2 and 3	This study
gas1717850	M1UK	Blood culture	2022	UK	ERR12371123	PRJEB68199	Dataset 1, 2 and 3	This study
gas1722632	M1UK	Blood culture	2022	UK	ERR12371124	PRJEB68199	Dataset 1, 2 and 3	This study
gas1722657	M1UK	Blood culture	2022	UK	ERR12371125	PRJEB68199	Dataset 1, 2 and 3	This study
gas1722670	M1UK	Pus	2022	UK	ERR12371126	PRJEB68199	Dataset 1, 2 and 3	This study
gas1722671	M1UK	Blood culture	2022	UK	ERR12371127	PRJEB68199	Dataset 1, 2 and 3	This study
gas1728077	26 SNPs	Throat swab	2022	UK	ERR12371128	PRJEB68199	Dataset 1, 2 and 3	This study
gas1728082	M1UK	Blood culture	2022	UK	ERR12371129	PRJEB68199	Dataset 1, 2 and 3	This study
gas1728096	M1UK	Abscess	2022	UK	ERR12371130	PRJEB68199	Dataset 1, 2 and 3	This study
gas1728099	26 SNPs	Wound swab	2022	UK	ERR12371131	PRJEB68199	Dataset 1, 2 and 3	This study
gas1728101	M1UK	Bone	2022	UK	ERR12371132	PRJEB68199	Dataset 1, 2 and 3	This study
gas1728102	M1UK	Tissue	2022	UK	ERR12371133	PRJEB68199	Dataset 1, 2 and 3	This study
gas1728103	M1UK	Blood culture	2022	UK	ERR12371134	PRJEB68199	Dataset 1, 2 and 3	This study
gas1728107	M1UK	Blood culture	2022	UK	ERR12371135	PRJEB68199	Dataset 1, 2 and 3	This study
gas1728119	M1UK	Blood culture	2022	UK	ERR12371136	PRJEB68199	Dataset 1, 2 and 3	This study
gas1730134	M1UK	Blood culture	2022	UK	ERR12371137	PRJEB68199	Dataset 1, 2 and 3	This study
gas1730142	M1UK	Wound swab	2022	UK	ERR12371138	PRJEB68199	Dataset 1, 2 and 3	This study
gas1730147	M1UK	Blood culture	2022	UK	ERR12371139	PRJEB68199	Dataset 1, 2 and 3	This study
gas1730222	M1UK	Blood culture	2022	UK	ERR12371140	PRJEB68199	Dataset 1, 2 and 3	This study
gas1735886	M1UK	Blood culture	2022	UK	ERR12371141	PRJEB68199	Dataset 1, 2 and 3	This study
gas1735910	M1UK	Blood culture	2022	UK	ERR12371142	PRJEB68199	Dataset 1, 2 and 3	This study
gas1735935	M1UK	Blood culture	2022	UK	ERR12371143	PRJEB68199	Dataset 1, 2 and 3	This study
gas1739394	26 SNPs	Abscess	2022	UK	ERR12371144	PRJEB68199	Dataset 1, 2 and 3	This study
gas1739407	M1Global	Blood culture	2022	UK	ERR12371145	PRJEB68199	Dataset 1 and 2	This study
gas1739412	M1UK	Blood culture	2022	UK	ERR12371146	PRJEB68199	Dataset 1, 2 and 3	This study
gas1739416	M1UK	Blood culture	2022	UK	ERR12371147	PRJEB68199	Dataset 1, 2 and 3	This study
gas1739417	M1UK	Blood culture	2022	UK	ERR12371148	PRJEB68199	Dataset 1, 2 and 3	This study
gas1739426	M1UK	Blood culture	2022	UK	ERR12371149	PRJEB68199	Dataset 1, 2 and 3	This study
gas1739429	M1UK	Blood culture	2022	UK	ERR12371150	PRJEB68199	Dataset 1, 2 and 3	This study
gas1739437	M1UK	Throat swab	2022	UK	ERR12371151	PRJEB68199	Dataset 1, 2 and 3	This study
gas1739443	M1UK	Vaginal swab	2022	UK	ERR12371152	PRJEB68199	Dataset 1, 2 and 3	This study
gas1739451	M1UK	Tissue	2022	UK	ERR12371153	PRJEB68199	Dataset 1, 2 and 3	This study
gas1739458	M1UK	Blood culture	2022	UK	ERR12371154	PRJEB68199	Dataset 1, 2 and 3	This study
gas1739460	M1UK	Aspirate	2022	UK	ERR12371155	PRJEB68199	Dataset 1, 2 and 3	This study
gas1739467	M1UK	Blood culture	2022	UK	ERR12371156	PRJEB68199	Dataset 1, 2 and 3	This study
gas1739472	M1UK	Pericardial fluid	2022	UK	ERR12371157	PRJEB68199	Dataset 1, 2 and 3	This study
gas1739479	M1UK	Blood culture	2022	UK	ERR12371158	PRJEB68199	Dataset 1, 2 and 3	This study
gas1742801	M1UK	Bronchial alveolar lavage	2022	UK	ERR12371159	PRJEB68199	Dataset 1, 2 and 3	This study
gas1742802	M1UK	Blood culture	2022	UK	ERR12371160	PRJEB68199	Dataset 1, 2 and 3	This study
gas1742839	M1UK	Blood culture	2022	UK	ERR12371161	PRJEB68199	Dataset 1, 2 and 3	This study
gas1742842	M1UK	Knee aspirate	2022	UK	ERR12371162	PRJEB68199	Dataset 1, 2 and 3	This study
gas1742862	M1UK	Blood culture	2022	UK	ERR12371163	PRJEB68199	Dataset 1, 2 and 3	This study
gas1742863	M1UK	Blood culture	2022	UK	ERR12371164	PRJEB68199	Dataset 1, 2 and 3	This study
gas1743489	M1UK	Blood culture	2022	UK	ERR12371165	PRJEB68199	Dataset 1, 2 and 3	This study
gas1743493	M1UK	Blood culture	2022	UK	ERR12371166	PRJEB68199	Dataset 1, 2 and 3	This study
gas1743494	M1UK	Blood culture	2022	UK	ERR12371167	PRJEB68199	Dataset 1, 2 and 3	This study
gas1743498	M1UK	Blood culture	2022	UK	ERR12371168	PRJEB68199	Dataset 1, 2 and 3	This study
gas1743505	M1UK	Tissue	2022	UK	ERR12371169	PRJEB68199	Dataset 1, 2 and 3	This study
gas1743517	M1UK	Pleural fluid	2022	UK	ERR12371170	PRJEB68199	Dataset 1, 2 and 3	This study
gas1743524	M1UK	Blood culture	2022	UK	ERR12371171	PRJEB68199	Dataset 1, 2 and 3	This study
gas1743525	M1UK	Blood culture	2022	UK	ERR12371172	PRJEB68199	Dataset 1, 2 and 3	This study
gas1743536	M1UK	Wound swab	2022	UK	ERR12371173	PRJEB68199	Dataset 1, 2 and 3	This study
gas1743541	M1UK	Blood culture	2022	UK	ERR12371174	PRJEB68199	Dataset 1, 2 and 3	This study
gas1743542	M1UK	Blood culture	2022	UK	ERR12371175	PRJEB68199	Dataset 1, 2 and 3	This study
gas1743552	M1UK	Placenta	2022	UK	ERR12371176	PRJEB68199	Dataset 1, 2 and 3	This study
gas1743556	M1UK	Blood culture	2022	UK	ERR12371177	PRJEB68199	Dataset 1, 2 and 3	This study
gas1743557	M1UK	Blood culture	2022	UK	ERR12371178	PRJEB68199	Dataset 1, 2 and 3	This study
gas1743558	M1UK	Blood culture	2022	UK	ERR12371179	PRJEB68199	Dataset 1, 2 and 3	This study
gas1743559	M1UK	Blood culture	2022	UK	ERR12371180	PRJEB68199	Dataset 1, 2 and 3	This study
gas1743560	M1UK	Blood culture	2022	UK	ERR12371181	PRJEB68199	Dataset 1, 2 and 3	This study
gas1743563	M1UK	Blood culture	2022	UK	ERR12371182	PRJEB68199	Dataset 1, 2 and 3	This study
gas1749499	M1UK	Blood culture	2022	UK	ERR12371183	PRJEB68199	Dataset 1, 2 and 3	This study
gas1749505	M1UK	Blood culture	2022	UK	ERR12371184	PRJEB68199	Dataset 1, 2 and 3	This study
gas1749515	M1UK	Blood culture	2022	UK	ERR12371185	PRJEB68199	Dataset 1, 2 and 3	This study
gas1749522	M1Global	Fluid	2022	UK	ERR12371186	PRJEB68199	Dataset 1 and 2	This study
gas1749523	M1UK	Tissue	2022	UK	ERR12371187	PRJEB68199	Dataset 1, 2 and 3	This study
gas1749524	26 SNPs	Blood culture	2022	UK	ERR12371188	PRJEB68199	Dataset 1, 2 and 3	This study
gas1749525	M1UK	Blood culture	2022	UK	ERR12371189	PRJEB68199	Dataset 1, 2 and 3	This study
gas1749526	M1UK	Blood culture	2022	UK	ERR12371190	PRJEB68199	Dataset 1, 2 and 3	This study
gas1749527	M1UK	Blood culture	2022	UK	ERR12371191	PRJEB68199	Dataset 1, 2 and 3	This study
gas1749530	M1UK	Blood culture	2022	UK	ERR12371192	PRJEB68199	Dataset 1, 2 and 3	This study
gas1749537	M1UK	Blood culture	2022	UK	ERR12371193	PRJEB68199	Dataset 1, 2 and 3	This study
gas1749545	M1UK	Blood culture	2022	UK	ERR12371194	PRJEB68199	Dataset 1, 2 and 3	This study
gas1749549	M1Global	Blood culture	2022	UK	ERR12371195	PRJEB68199	Dataset 1 and 2	This study
gas1749556	M1UK	Blood culture	2022	UK	ERR12371196	PRJEB68199	Dataset 1, 2 and 3	This study
gas1749558	M1UK	Blood culture	2022	UK	ERR12371197	PRJEB68199	Dataset 1, 2 and 3	This study
gas1749564	M1UK	Blood culture	2022	UK	ERR12371198	PRJEB68199	Dataset 1, 2 and 3	This study
gas1749565	M1UK	Blood culture	2022	UK	ERR12371199	PRJEB68199	Dataset 1, 2 and 3	This study
gas1749566	M1UK	Fluid	2022	UK	ERR12371200	PRJEB68199	Dataset 1, 2 and 3	This study
gas1749567	M1UK	Blood culture	2022	UK	ERR12371201	PRJEB68199	Dataset 1, 2 and 3	This study
gas1755654	M1UK	Blood culture	2022	UK	ERR12371202	PRJEB68199	Dataset 1, 2 and 3	This study
gas1755656	M1UK	Blood culture	2022	UK	ERR12371203	PRJEB68199	Dataset 1, 2 and 3	This study
gas1755657	M1UK	Wound swab	2022	UK	ERR12371204	PRJEB68199	Dataset 1, 2 and 3	This study
gas1755660	M1UK	Blood culture	2022	UK	ERR12371205	PRJEB68199	Dataset 1, 2 and 3	This study
gas1755666	M1Global	Blood culture	2022	UK	ERR12371206	PRJEB68199	Dataset 1 and 2	This study
gas1755668	M1UK	Tissue	2022	UK	ERR12371207	PRJEB68199	Dataset 1, 2 and 3	This study
gas1755672	M1UK	Blood culture	2022	UK	ERR12371208	PRJEB68199	Dataset 1, 2 and 3	This study
gas1755675	M1UK	Knee aspirate	2022	UK	ERR12371209	PRJEB68199	Dataset 1, 2 and 3	This study
gas1755677	M1UK	Abscess	2022	UK	ERR12371210	PRJEB68199	Dataset 1, 2 and 3	This study
gas1755680	M1UK	Blood culture	2022	UK	ERR12371211	PRJEB68199	Dataset 1, 2 and 3	This study
gas1755688	M1UK	Blood culture	2022	UK	ERR12371212	PRJEB68199	Dataset 1, 2 and 3	This study
gas1755690	M1UK	Blood culture	2022	UK	ERR12371213	PRJEB68199	Dataset 1, 2 and 3	This study
gas1755691	M1UK	Blood culture	2022	UK	ERR12371214	PRJEB68199	Dataset 1, 2 and 3	This study
gas1755694	M1UK	Blood culture	2022	UK	ERR12371215	PRJEB68199	Dataset 1, 2 and 3	This study
gas1755695	M1UK	Blood culture	2022	UK	ERR12371216	PRJEB68199	Dataset 1, 2 and 3	This study
gas1755696	M1UK	Blood culture	2022	UK	ERR12371217	PRJEB68199	Dataset 1, 2 and 3	This study
gas1755702	M1UK	Blood culture	2022	UK	ERR12371218	PRJEB68199	Dataset 1, 2 and 3	This study
gas1755711	M1UK	Blood culture	2022	UK	ERR12371219	PRJEB68199	Dataset 1, 2 and 3	This study
gas1755713	M1UK	Blood culture	2022	UK	ERR12371220	PRJEB68199	Dataset 1, 2 and 3	This study
gas1760474	M1UK	Blood culture	2022	UK	ERR12371221	PRJEB68199	Dataset 1, 2 and 3	This study
gas1760495	M1UK	Blood culture	2022	UK	ERR12371222	PRJEB68199	Dataset 1, 2 and 3	This study
gas1760513	M1UK	Blood culture	2022	UK	ERR12371223	PRJEB68199	Dataset 1, 2 and 3	This study
gas1760526	M1UK	Blood culture	2022	UK	ERR12371224	PRJEB68199	Dataset 1, 2 and 3	This study
gas1760543	26 SNPs	Blood culture	2022	UK	ERR12371225	PRJEB68199	Dataset 1, 2 and 3	This study
gas1760554	M1UK	Blood culture	2022	UK	ERR12371226	PRJEB68199	Dataset 1, 2 and 3	This study
gas1760558	M1UK	Blood culture	2022	UK	ERR12371227	PRJEB68199	Dataset 1, 2 and 3	This study
gas1767087	M1Global	Information not provided	2022	UK	ERR12371228	PRJEB68199	Dataset 1 and 2	This study
gas1767089	M1UK	Throat swab	2022	UK	ERR12371229	PRJEB68199	Dataset 1, 2 and 3	This study
gas1767090	M1UK	Blood culture	2022	UK	ERR12371230	PRJEB68199	Dataset 1, 2 and 3	This study
gas1767092	M1UK	Blood culture	2022	UK	ERR12371231	PRJEB68199	Dataset 1, 2 and 3	This study
gas1767093	M1UK	Blood culture	2022	UK	ERR12371232	PRJEB68199	Dataset 1, 2 and 3	This study
gas1767094	M1UK	Blood culture	2022	UK	ERR12371233	PRJEB68199	Dataset 1, 2 and 3	This study
gas1767095	M1UK	Blood culture	2022	UK	ERR12371234	PRJEB68199	Dataset 1, 2 and 3	This study
gas1767101	M1UK	Blood culture	2022	UK	ERR12371235	PRJEB68199	Dataset 1, 2 and 3	This study
gas1767102	M1UK	Aspirate	2022	UK	ERR12371236	PRJEB68199	Dataset 1, 2 and 3	This study
gas1767104	M1UK	Blood culture	2022	UK	ERR12371237	PRJEB68199	Dataset 1, 2 and 3	This study
gas1767111	M1UK	Tissue	2022	UK	ERR12371238	PRJEB68199	Dataset 1, 2 and 3	This study
gas1767113	M1UK	Blood culture	2022	UK	ERR12371239	PRJEB68199	Dataset 1, 2 and 3	This study
gas1767119	26 SNPs	Blood culture	2022	UK	ERR12371240	PRJEB68199	Dataset 1, 2 and 3	This study
gas1767120	M1UK	Blood culture	2022	UK	ERR12371241	PRJEB68199	Dataset 1, 2 and 3	This study
gas1767121	M1UK	Blood culture	2022	UK	ERR12371242	PRJEB68199	Dataset 1, 2 and 3	This study
gas1767124	M1UK	Blood culture	2022	UK	ERR12371243	PRJEB68199	Dataset 1, 2 and 3	This study
gas1767125	M1UK	Tissue fascia	2022	UK	ERR12371244	PRJEB68199	Dataset 1, 2 and 3	This study
gas1767126	M1UK	Biopsy from lung	2022	UK	ERR12371245	PRJEB68199	Dataset 1, 2 and 3	This study
gas1767137	M1UK	Blood culture	2022	UK	ERR12371246	PRJEB68199	Dataset 1, 2 and 3	This study
gas1767138	M1UK	Blood culture	2022	UK	ERR12371247	PRJEB68199	Dataset 1, 2 and 3	This study
gas1767141	M1UK	Blood culture	2022	UK	ERR12371248	PRJEB68199	Dataset 1, 2 and 3	This study
gas1767142	M1UK	Blood culture	2022	UK	ERR12371249	PRJEB68199	Dataset 1, 2 and 3	This study
gas1767145	M1UK	Tissue	2022	UK	ERR12371250	PRJEB68199	Dataset 1, 2 and 3	This study
gas1767150	M1UK	Blood culture	2022	UK	ERR12371251	PRJEB68199	Dataset 1, 2 and 3	This study
gas1767155	M1UK	Tissue	2022	UK	ERR12371252	PRJEB68199	Dataset 1, 2 and 3	This study
gas1768124	M1UK	Blood culture	2022	UK	ERR12371253	PRJEB68199	Dataset 1, 2 and 3	This study
gas1768126	M1UK	Blood culture	2022	UK	ERR12371254	PRJEB68199	Dataset 1, 2 and 3	This study
gas1768134	M1UK	Blood culture	2022	UK	ERR12371255	PRJEB68199	Dataset 1, 2 and 3	This study
gas1768141	M1UK	Pleural fluid	2022	UK	ERR12371256	PRJEB68199	Dataset 1, 2 and 3	This study
gas1768142	M1UK	Blood culture	2022	UK	ERR12371257	PRJEB68199	Dataset 1, 2 and 3	This study
gas1768145	M1UK	Blood culture	2022	UK	ERR12371258	PRJEB68199	Dataset 1, 2 and 3	This study
gas1768147	M1UK	Tissue	2022	UK	ERR12371259	PRJEB68199	Dataset 1, 2 and 3	This study
gas1768148	M1UK	Blood culture	2022	UK	ERR12371260	PRJEB68199	Dataset 1, 2 and 3	This study
gas1768158	M1UK	Blood culture	2022	UK	ERR12371261	PRJEB68199	Dataset 1, 2 and 3	This study
gas1768167	M1Global	Pleural fluid	2022	UK	ERR12371262	PRJEB68199	Dataset 1 and 2	This study
gas1768168	M1UK	Blood culture	2022	UK	ERR12371263	PRJEB68199	Dataset 1, 2 and 3	This study
gas1768171	M1UK	Wound swab	2022	UK	ERR12371264	PRJEB68199	Dataset 1, 2 and 3	This study
gas1768177	M1UK	Blood culture	2022	UK	ERR12371265	PRJEB68199	Dataset 1, 2 and 3	This study
gas1768178	M1UK	Blood culture	2022	UK	ERR12371266	PRJEB68199	Dataset 1, 2 and 3	This study
gas1768182	M1UK	Blood culture	2022	UK	ERR12371267	PRJEB68199	Dataset 1, 2 and 3	This study
gas1768196	M1UK	Blood culture	2022	UK	ERR12371268	PRJEB68199	Dataset 1, 2 and 3	This study
gas1768197	M1UK	Blood culture	2022	UK	ERR12371269	PRJEB68199	Dataset 1, 2 and 3	This study
gas1768200	M1UK	Blood culture	2022	UK	ERR12371270	PRJEB68199	Dataset 1, 2 and 3	This study
gas1776678	M1UK	Pleural fluid	2022	UK	ERR12371271	PRJEB68199	Dataset 1, 2 and 3	This study
gas1776684	M1UK	Blood culture	2022	UK	ERR12371272	PRJEB68199	Dataset 1, 2 and 3	This study
gas1776685	M1UK	Pleural fluid	2022	UK	ERR12371273	PRJEB68199	Dataset 1, 2 and 3	This study
gas1776687	M1UK	Abdominal tissue	2022	UK	ERR12371274	PRJEB68199	Dataset 1, 2 and 3	This study
gas1776692	M1UK	Blood culture	2022	UK	ERR12371275	PRJEB68199	Dataset 1, 2 and 3	This study
gas1776698	M1UK	Blood culture	2022	UK	ERR12371276	PRJEB68199	Dataset 1, 2 and 3	This study
gas1776703	M1UK	Blood culture	2022	UK	ERR12371277	PRJEB68199	Dataset 1, 2 and 3	This study
gas1776706	M1UK	Blood culture	2022	UK	ERR12371278	PRJEB68199	Dataset 1, 2 and 3	This study
gas1776707	M1UK	Blood culture	2022	UK	ERR12371279	PRJEB68199	Dataset 1, 2 and 3	This study
gas1776708	M1UK	Tissue	2022	UK	ERR12371280	PRJEB68199	Dataset 1, 2 and 3	This study
gas1776716	M1UK	Blood culture	2022	UK	ERR12371281	PRJEB68199	Dataset 1, 2 and 3	This study
gas1776722	M1UK	Blood culture	2022	UK	ERR12371282	PRJEB68199	Dataset 1, 2 and 3	This study
gas1776730	M1UK	Blood culture	2022	UK	ERR12371283	PRJEB68199	Dataset 1, 2 and 3	This study
gas1776732	M1UK	Pleural fluid	2022	UK	ERR12371284	PRJEB68199	Dataset 1, 2 and 3	This study
gas1776735	M1UK	Blood culture	2022	UK	ERR12371285	PRJEB68199	Dataset 1, 2 and 3	This study
gas1776736	M1UK	Blood culture	2022	UK	ERR12371286	PRJEB68199	Dataset 1, 2 and 3	This study
gas1776739	M1UK	Wound swab	2022	UK	ERR12371287	PRJEB68199	Dataset 1, 2 and 3	This study
gas1776747	M1UK	Fluid	2022	UK	ERR12371288	PRJEB68199	Dataset 1, 2 and 3	This study
gas1776749	M1UK	Blood culture	2022	UK	ERR12371289	PRJEB68199	Dataset 1, 2 and 3	This study
gas1776753	M1UK	Pus	2022	UK	ERR12371290	PRJEB68199	Dataset 1, 2 and 3	This study
gas1776756	M1UK	Blood culture	2022	UK	ERR12371291	PRJEB68199	Dataset 1, 2 and 3	This study
gas1776758	M1UK	Blood culture	2022	UK	ERR12371292	PRJEB68199	Dataset 1, 2 and 3	This study
gas1776759	M1UK	Blood culture	2022	UK	ERR12371293	PRJEB68199	Dataset 1, 2 and 3	This study
gas1776761	M1UK	Blood culture	2022	UK	ERR12371294	PRJEB68199	Dataset 1, 2 and 3	This study
gas1776768	M1UK	Blood culture	2022	UK	ERR12371295	PRJEB68199	Dataset 1, 2 and 3	This study
gas1776770	M1UK	Blood culture	2022	UK	ERR12371296	PRJEB68199	Dataset 1, 2 and 3	This study
gas1776771	M1UK	Blood culture	2022	UK	ERR12371297	PRJEB68199	Dataset 1, 2 and 3	This study
gas1776772	M1UK	Blood culture	2022	UK	ERR12371298	PRJEB68199	Dataset 1, 2 and 3	This study
gas1778489	M1UK	Blood culture	2022	UK	ERR12371299	PRJEB68199	Dataset 1, 2 and 3	This study
gas1778493	M1UK	Pleural fluid	2022	UK	ERR12371300	PRJEB68199	Dataset 1, 2 and 3	This study
gas1778496	M1UK	Chest drain	2022	UK	ERR12371301	PRJEB68199	Dataset 1, 2 and 3	This study
gas1778502	M1UK	Blood culture	2022	UK	ERR12371302	PRJEB68199	Dataset 1, 2 and 3	This study
gas1778505	M1UK	Blood culture	2022	UK	ERR12371303	PRJEB68199	Dataset 1, 2 and 3	This study
gas1778508	M1UK	Blood culture	2022	UK	ERR12371304	PRJEB68199	Dataset 1, 2 and 3	This study
gas1778514	M1UK	Blood culture	2022	UK	ERR12371305	PRJEB68199	Dataset 1, 2 and 3	This study
gas1778524	M1UK	Blood culture	2022	UK	ERR12371306	PRJEB68199	Dataset 1, 2 and 3	This study
gas1778527	M1UK	Blood culture	2022	UK	ERR12371307	PRJEB68199	Dataset 1, 2 and 3	This study
gas1778535	M1UK	Blood culture	2022	UK	ERR12371308	PRJEB68199	Dataset 1, 2 and 3	This study
gas1778539	M1UK	Blood culture	2022	UK	ERR12371309	PRJEB68199	Dataset 1, 2 and 3	This study
gas1778540	M1UK	Blood culture	2022	UK	ERR12371310	PRJEB68199	Dataset 1, 2 and 3	This study
gas1778541	M1UK	Pleural fluid	2022	UK	ERR12371311	PRJEB68199	Dataset 1, 2 and 3	This study
gas1778545	M1UK	Tissue	2022	UK	ERR12371312	PRJEB68199	Dataset 1, 2 and 3	This study
gas1778550	M1UK	Throat swab	2022	UK	ERR12371313	PRJEB68199	Dataset 1, 2 and 3	This study
gas1778553	M1UK	Blood culture	2022	UK	ERR12371314	PRJEB68199	Dataset 1, 2 and 3	This study
gas1778556	M1UK	Pleural fluid	2022	UK	ERR12371315	PRJEB68199	Dataset 1, 2 and 3	This study
gas1778559	26 SNPs	Blood culture	2022	UK	ERR12371316	PRJEB68199	Dataset 1, 2 and 3	This study
gas1778571	M1UK	Sputum	2022	UK	ERR12371317	PRJEB68199	Dataset 1, 2 and 3	This study
gas1778572	M1UK	Blood culture	2022	UK	ERR12371318	PRJEB68199	Dataset 1, 2 and 3	This study
gas1778574	M1UK	Blood culture	2022	UK	ERR12371319	PRJEB68199	Dataset 1, 2 and 3	This study
gas1778576	M1UK	Blood culture	2022	UK	ERR12371320	PRJEB68199	Dataset 1, 2 and 3	This study
gas1783638	M1UK	Blood culture	2022	UK	ERR12371321	PRJEB68199	Dataset 1, 2 and 3	This study
gas1783639	M1Global	Fluid	2022	UK	ERR12371322	PRJEB68199	Dataset 1 and 2	This study
gas1783645	M1UK	Blood culture	2022	UK	ERR12371323	PRJEB68199	Dataset 1, 2 and 3	This study
gas1783646	M1UK	Blood culture	2022	UK	ERR12371324	PRJEB68199	Dataset 1, 2 and 3	This study
gas1783649	M1UK	Blood culture	2022	UK	ERR12371325	PRJEB68199	Dataset 1, 2 and 3	This study
gas1783660	M1UK	Blood culture	2022	UK	ERR12371326	PRJEB68199	Dataset 1, 2 and 3	This study
gas1783663	M1UK	Blood culture	2022	UK	ERR12371327	PRJEB68199	Dataset 1, 2 and 3	This study
gas1783670	M1UK	Aspirate (joint)	2022	UK	ERR12371328	PRJEB68199	Dataset 1, 2 and 3	This study
gas1783671	M1Global	Wound swab	2022	UK	ERR12371329	PRJEB68199	Dataset 1 and 2	This study
gas1783677	M1UK	Blood culture	2022	UK	ERR12371330	PRJEB68199	Dataset 1, 2 and 3	This study
gas1783678	M1UK	Blood culture	2022	UK	ERR12371331	PRJEB68199	Dataset 1, 2 and 3	This study
gas1783685	M1UK	Blood culture	2022	UK	ERR12371332	PRJEB68199	Dataset 1, 2 and 3	This study
gas1783686	M1UK	Blood culture	2022	UK	ERR12371333	PRJEB68199	Dataset 1, 2 and 3	This study
gas1783696	M1UK	Blood culture	2022	UK	ERR12371334	PRJEB68199	Dataset 1, 2 and 3	This study
gas1783697	M1UK	Blood culture	2022	UK	ERR12371335	PRJEB68199	Dataset 1, 2 and 3	This study
gas1783698	M1UK	Blood culture	2022	UK	ERR12371336	PRJEB68199	Dataset 1, 2 and 3	This study
gas1783700	M1UK	Blood culture	2022	UK	ERR12371337	PRJEB68199	Dataset 1, 2 and 3	This study
gas1783701	M1UK	Blood culture	2022	UK	ERR12371338	PRJEB68199	Dataset 1, 2 and 3	This study
gas1783708	M1UK	Blood culture	2022	UK	ERR12371339	PRJEB68199	Dataset 1, 2 and 3	This study
gas1783709	M1UK	Blood culture	2022	UK	ERR12371340	PRJEB68199	Dataset 1, 2 and 3	This study
gas1783711	M1UK	Blood culture	2022	UK	ERR12371341	PRJEB68199	Dataset 1, 2 and 3	This study
gas1783714	M1UK	Wound swab	2022	UK	ERR12371342	PRJEB68199	Dataset 1, 2 and 3	This study
gas1783718	M1UK	Blood culture	2022	UK	ERR12371343	PRJEB68199	Dataset 1, 2 and 3	This study
gas1783719	M1UK	Blood culture	2022	UK	ERR12371344	PRJEB68199	Dataset 1, 2 and 3	This study
gas1783720	M1UK	Pus	2022	UK	ERR12371345	PRJEB68199	Dataset 1, 2 and 3	This study
gas1783721	M1UK	Blood culture	2022	UK	ERR12371346	PRJEB68199	Dataset 1, 2 and 3	This study
gas1783723	M1UK	Blood culture	2022	UK	ERR12371347	PRJEB68199	Dataset 1, 2 and 3	This study
gas1783726	M1UK	Pus	2022	UK	ERR12371348	PRJEB68199	Dataset 1, 2 and 3	This study
gas1783730	M1UK	Information not provided	2022	UK	ERR12371349	PRJEB68199	Dataset 1, 2 and 3	This study
gas1787935	M1UK	Blood culture	2022	UK	ERR12371350	PRJEB68199	Dataset 1, 2 and 3	This study
gas1787940	M1UK	Blood culture	2022	UK	ERR12371351	PRJEB68199	Dataset 1, 2 and 3	This study
gas1787941	M1Global	Blood culture	2022	UK	ERR12371352	PRJEB68199	Dataset 1 and 2	This study
gas1787944	M1UK	Blood culture	2022	UK	ERR12371353	PRJEB68199	Dataset 1, 2 and 3	This study
gas1787951	M1Global	Abscess	2022	UK	ERR12371354	PRJEB68199	Dataset 1 and 2	This study
gas1787955	M1UK	Blood culture	2022	UK	ERR12371355	PRJEB68199	Dataset 1, 2 and 3	This study
gas1787961	M1UK	Information not provided	2022	UK	ERR12371356	PRJEB68199	Dataset 1, 2 and 3	This study
gas1787962	M1UK	Pleural fluid	2022	UK	ERR12371357	PRJEB68199	Dataset 1, 2 and 3	This study
gas1787963	M1UK	Pleural fluid	2022	UK	ERR12371358	PRJEB68199	Dataset 1, 2 and 3	This study
gas1787975	M1UK	Pleural fluid	2022	UK	ERR12371359	PRJEB68199	Dataset 1, 2 and 3	This study
gas1787976	M1UK	Blood culture	2022	UK	ERR12371360	PRJEB68199	Dataset 1, 2 and 3	This study
gas1787978	M1UK	Blood culture	2022	UK	ERR12371361	PRJEB68199	Dataset 1, 2 and 3	This study
gas1787981	M1UK	Blood culture	2022	UK	ERR12371362	PRJEB68199	Dataset 1, 2 and 3	This study
gas1787983	M1UK	Blood culture	2022	UK	ERR12371363	PRJEB68199	Dataset 1, 2 and 3	This study
gas1787988	M1UK	Blood culture	2022	UK	ERR12371364	PRJEB68199	Dataset 1, 2 and 3	This study
gas1787991	M1UK	Aspirate	2022	UK	ERR12371365	PRJEB68199	Dataset 1, 2 and 3	This study
gas1787995	M1UK	Blood culture	2022	UK	ERR12371366	PRJEB68199	Dataset 1, 2 and 3	This study
gas1788001	M1UK	Throat swab	2022	UK	ERR12371367	PRJEB68199	Dataset 1, 2 and 3	This study
gas1788002	M1Global	Abscess	2022	UK	ERR12371368	PRJEB68199	Dataset 1 and 2	This study
gas1788007	M1UK	Blood culture	2022	UK	ERR12371369	PRJEB68199	Dataset 1, 2 and 3	This study
gas1788008	M1UK	Blood culture	2022	UK	ERR12371370	PRJEB68199	Dataset 1, 2 and 3	This study
gas1788009	M1UK	Blood culture	2022	UK	ERR12371371	PRJEB68199	Dataset 1, 2 and 3	This study
gas1788010	M1UK	Pleural fluid	2022	UK	ERR12371372	PRJEB68199	Dataset 1, 2 and 3	This study
gas1788018	M1UK	Wound swab	2022	UK	ERR12371373	PRJEB68199	Dataset 1, 2 and 3	This study
gas1788019	M1UK	Blood culture	2022	UK	ERR12371374	PRJEB68199	Dataset 1, 2 and 3	This study
gas1788021	M1UK	Pus	2022	UK	ERR12371375	PRJEB68199	Dataset 1, 2 and 3	This study
gas1788024	M1UK	Blood culture	2022	UK	ERR12371376	PRJEB68199	Dataset 1, 2 and 3	This study
gas1788025	M1UK	Tissue	2022	UK	ERR12371377	PRJEB68199	Dataset 1, 2 and 3	This study
gas1789131	26 SNPs	Blood culture	2022	UK	ERR12371378	PRJEB68199	Dataset 1, 2 and 3	This study
gas1789147	M1UK	Blood culture	2022	UK	ERR12371379	PRJEB68199	Dataset 1, 2 and 3	This study
gas1789148	M1UK	Blood culture	2022	UK	ERR12371380	PRJEB68199	Dataset 1, 2 and 3	This study
gas1789154	M1UK	Information not provided	2022	UK	ERR12371381	PRJEB68199	Dataset 1, 2 and 3	This study
gas1789172	M1UK	Blood culture	2022	UK	ERR12371382	PRJEB68199	Dataset 1, 2 and 3	This study
gas1789179	M1UK	Blood culture	2022	UK	ERR12371383	PRJEB68199	Dataset 1, 2 and 3	This study
gas1789182	M1Global	Blood culture	2022	UK	ERR12371384	PRJEB68199	Dataset 1 and 2	This study
gas1789185	M1UK	Blood culture	2022	UK	ERR12371385	PRJEB68199	Dataset 1, 2 and 3	This study
gas1791012	M1UK	Pleural fluid	2022	UK	ERR12371386	PRJEB68199	Dataset 1, 2 and 3	This study
gas1791014	M1UK	Blood culture	2022	UK	ERR12371387	PRJEB68199	Dataset 1, 2 and 3	This study
gas1791015	M1UK	Pleural fluid	2022	UK	ERR12371388	PRJEB68199	Dataset 1, 2 and 3	This study
gas1791021	M1Global	Blood culture	2022	UK	ERR12371389	PRJEB68199	Dataset 1 and 2	This study
gas1791023	M1UK	Blood culture	2022	UK	ERR12371390	PRJEB68199	Dataset 1, 2 and 3	This study
gas1791028	M1UK	Blood culture	2022	UK	ERR12371391	PRJEB68199	Dataset 1, 2 and 3	This study
gas1791029	M1UK	Sputum	2022	UK	ERR12371392	PRJEB68199	Dataset 1, 2 and 3	This study
gas1791033	M1UK	Blood culture	2022	UK	ERR12371393	PRJEB68199	Dataset 1, 2 and 3	This study
gas1791034	M1Global	Tissue	2022	UK	ERR12371394	PRJEB68199	Dataset 1 and 2	This study
gas1791036	M1UK	Throat swab	2022	UK	ERR12371395	PRJEB68199	Dataset 1, 2 and 3	This study
gas1791040	M1UK	Pleural fluid	2022	UK	ERR12371396	PRJEB68199	Dataset 1, 2 and 3	This study
gas1791042	M1UK	Blood culture	2022	UK	ERR12371397	PRJEB68199	Dataset 1, 2 and 3	This study
gas1791044	M1UK	Pleural fluid	2022	UK	ERR12371398	PRJEB68199	Dataset 1, 2 and 3	This study
gas1791045	M1UK	Blood culture	2022	UK	ERR12371399	PRJEB68199	Dataset 1, 2 and 3	This study
gas1791046	M1UK	Pus	2022	UK	ERR12371400	PRJEB68199	Dataset 1, 2 and 3	This study
gas1791051	M1UK	Throat swab	2022	UK	ERR12371401	PRJEB68199	Dataset 1, 2 and 3	This study
gas1791055	M1UK	Blood culture	2022	UK	ERR12371402	PRJEB68199	Dataset 1, 2 and 3	This study
gas1791057	M1UK	Blood culture	2022	UK	ERR12371403	PRJEB68199	Dataset 1, 2 and 3	This study
gas1791062	M1UK	Blood culture	2022	UK	ERR12371404	PRJEB68199	Dataset 1, 2 and 3	This study
gas1791063	M1UK	Blood culture	2022	UK	ERR12371405	PRJEB68199	Dataset 1, 2 and 3	This study
gas1791065	M1UK	Blood culture	2022	UK	ERR12371406	PRJEB68199	Dataset 1, 2 and 3	This study
gas1791066	M1UK	Information not provided	2022	UK	ERR12371407	PRJEB68199	Dataset 1, 2 and 3	This study
gas1791070	M1UK	Blood culture	2022	UK	ERR12371408	PRJEB68199	Dataset 1, 2 and 3	This study
gas1791072	M1UK	Pleural fluid	2022	UK	ERR12371409	PRJEB68199	Dataset 1, 2 and 3	This study
gas1791074	M1UK	Blood culture	2022	UK	ERR12371410	PRJEB68199	Dataset 1, 2 and 3	This study
gas1791075	M1UK	Pleural fluid	2022	UK	ERR12371411	PRJEB68199	Dataset 1, 2 and 3	This study
gas1791076	M1UK	Blood culture	2022	UK	ERR12371412	PRJEB68199	Dataset 1, 2 and 3	This study
gas1791082	M1UK	Blood culture	2022	UK	ERR12371413	PRJEB68199	Dataset 1, 2 and 3	This study
gas1791083	M1UK	Blood culture	2022	UK	ERR12371414	PRJEB68199	Dataset 1, 2 and 3	This study
gas1791086	M1UK	Blood culture	2022	UK	ERR12371415	PRJEB68199	Dataset 1, 2 and 3	This study
gas1791089	M1UK	Blood culture	2022	UK	ERR12371416	PRJEB68199	Dataset 1, 2 and 3	This study
gas1791090	M1UK	Blood culture	2022	UK	ERR12371417	PRJEB68199	Dataset 1, 2 and 3	This study
gas1791093	M1UK	Blood culture	2022	UK	ERR12371418	PRJEB68199	Dataset 1, 2 and 3	This study
gas1791096	M1UK	High vaginal swab	2022	UK	ERR12371419	PRJEB68199	Dataset 1, 2 and 3	This study
gas1791097	M1UK	Throat swab	2022	UK	ERR12371420	PRJEB68199	Dataset 1, 2 and 3	This study
gas1791099	M1UK	Sputum	2022	UK	ERR12371421	PRJEB68199	Dataset 1, 2 and 3	This study
gas1791104	M1UK	Abscess	2022	UK	ERR12371422	PRJEB68199	Dataset 1, 2 and 3	This study
gas1793800	M1UK	Blood culture	2022	UK	ERR12371423	PRJEB68199	Dataset 1, 2 and 3	This study
gas1793801	M1UK	Blood culture	2022	UK	ERR12371424	PRJEB68199	Dataset 1, 2 and 3	This study
gas1793802	M1UK	Blood culture	2022	UK	ERR12371425	PRJEB68199	Dataset 1, 2 and 3	This study
gas1793806	M1UK	Pleural fluid	2022	UK	ERR12371426	PRJEB68199	Dataset 1, 2 and 3	This study
gas1793807	M1UK	Blood culture	2022	UK	ERR12371427	PRJEB68199	Dataset 1, 2 and 3	This study
gas1793808	M1UK	Blood culture	2022	UK	ERR12371428	PRJEB68199	Dataset 1, 2 and 3	This study
gas1793816	M1UK	Blood culture	2022	UK	ERR12371429	PRJEB68199	Dataset 1, 2 and 3	This study
gas1793819	M1UK	Nose swab	2022	UK	ERR12371430	PRJEB68199	Dataset 1, 2 and 3	This study
gas1793820	M1UK	Skin swab	2022	UK	ERR12371431	PRJEB68199	Dataset 1, 2 and 3	This study
gas1793829	M1UK	Pleural fluid	2022	UK	ERR12371432	PRJEB68199	Dataset 1, 2 and 3	This study
gas1793830	M1UK	Blood culture	2022	UK	ERR12371433	PRJEB68199	Dataset 1, 2 and 3	This study
gas1793833	M1UK	Blood culture	2022	UK	ERR12371434	PRJEB68199	Dataset 1, 2 and 3	This study
gas1793835	M1UK	Blood culture	2022	UK	ERR12371435	PRJEB68199	Dataset 1, 2 and 3	This study
gas1793837	M1UK	Bronchial alveolar lavage	2022	UK	ERR12371436	PRJEB68199	Dataset 1, 2 and 3	This study
gas1793839	M1UK	Blood culture	2022	UK	ERR12371437	PRJEB68199	Dataset 1, 2 and 3	This study
gas1793841	M1UK	Blood culture	2022	UK	ERR12371438	PRJEB68199	Dataset 1, 2 and 3	This study
gas1793843	M1UK	Blood culture	2022	UK	ERR12371439	PRJEB68199	Dataset 1, 2 and 3	This study
gas1793846	M1UK	Blood culture	2022	UK	ERR12371440	PRJEB68199	Dataset 1, 2 and 3	This study
gas1793852	M1UK	Csf	2022	UK	ERR12371441	PRJEB68199	Dataset 1, 2 and 3	This study
gas1793853	M1UK	Blood culture	2022	UK	ERR12371442	PRJEB68199	Dataset 1, 2 and 3	This study
gas1793854	M1UK	Pleural fluid	2022	UK	ERR12371443	PRJEB68199	Dataset 1, 2 and 3	This study
gas1793859	M1Global	Wound swab	2022	UK	ERR12371444	PRJEB68199	Dataset 1 and 2	This study
gas1793862	M1UK	Blood culture	2022	UK	ERR12371445	PRJEB68199	Dataset 1, 2 and 3	This study
gas1793863	M1UK	Pleural fluid	2022	UK	ERR12371446	PRJEB68199	Dataset 1, 2 and 3	This study
gas1793864	M1UK	Umbilicus	2022	UK	ERR12371447	PRJEB68199	Dataset 1, 2 and 3	This study
gas1793868	M1UK	Pleural fluid	2022	UK	ERR12371448	PRJEB68199	Dataset 1, 2 and 3	This study
gas1793869	M1UK	Blood culture	2022	UK	ERR12371449	PRJEB68199	Dataset 1, 2 and 3	This study
gas1793872	M1UK	Blood culture	2022	UK	ERR12371450	PRJEB68199	Dataset 1, 2 and 3	This study
gas1793874	M1UK	Blood culture	2022	UK	ERR12371451	PRJEB68199	Dataset 1, 2 and 3	This study
gas1793878	M1UK	Synovial fluid	2022	UK	ERR12371452	PRJEB68199	Dataset 1, 2 and 3	This study
gas1793879	M1UK	Blood culture	2022	UK	ERR12371453	PRJEB68199	Dataset 1, 2 and 3	This study
gas1793881	M1UK	Blood culture	2022	UK	ERR12371454	PRJEB68199	Dataset 1, 2 and 3	This study
gas1793886	M1UK	Pleural fluid	2022	UK	ERR12371455	PRJEB68199	Dataset 1, 2 and 3	This study
gas1793887	M1UK	Blood culture	2022	UK	ERR12371456	PRJEB68199	Dataset 1, 2 and 3	This study
gas1793888	M1UK	Blood culture	2022	UK	ERR12371457	PRJEB68199	Dataset 1, 2 and 3	This study
gas1793892	M1UK	Pleura	2022	UK	ERR12371458	PRJEB68199	Dataset 1, 2 and 3	This study
gas1805156	M1UK	Blood culture	2022	UK	ERR12371459	PRJEB68199	Dataset 1, 2 and 3	This study
gas1805157	M1UK	Blood culture	2022	UK	ERR12371460	PRJEB68199	Dataset 1, 2 and 3	This study
gas1805158	M1UK	Blood culture	2022	UK	ERR12371461	PRJEB68199	Dataset 1, 2 and 3	This study
gas1805159	M1UK	Blood culture	2022	UK	ERR12371462	PRJEB68199	Dataset 1, 2 and 3	This study
gas1805163	M1Global	Abscess	2022	UK	ERR12371463	PRJEB68199	Dataset 1 and 2	This study
gas1805168	M1UK	Blood culture	2022	UK	ERR12371464	PRJEB68199	Dataset 1, 2 and 3	This study
gas1805169	M1UK	Blood	2022	UK	ERR12371465	PRJEB68199	Dataset 1, 2 and 3	This study
gas1805171	M1UK	Blood culture	2022	UK	ERR12371466	PRJEB68199	Dataset 1, 2 and 3	This study
gas1805172	M1UK	Blood culture	2022	UK	ERR12371467	PRJEB68199	Dataset 1, 2 and 3	This study
gas1805174	M1UK	Blood culture	2022	UK	ERR12371468	PRJEB68199	Dataset 1, 2 and 3	This study
gas1805180	26 SNPs	Throat swab	2022	UK	ERR12371469	PRJEB68199	Dataset 1, 2 and 3	This study
gas1805181	M1UK	Blood culture	2022	UK	ERR12371470	PRJEB68199	Dataset 1, 2 and 3	This study
gas1805183	M1UK	Throat swab	2022	UK	ERR12371471	PRJEB68199	Dataset 1, 2 and 3	This study
gas1805185	M1UK	Ear swab	2022	UK	ERR12371472	PRJEB68199	Dataset 1, 2 and 3	This study
gas1805190	M1UK	Throat swab	2022	UK	ERR12371473	PRJEB68199	Dataset 1, 2 and 3	This study
gas1805192	M1UK	Blood culture	2022	UK	ERR12371474	PRJEB68199	Dataset 1, 2 and 3	This study
gas1805194	M1UK	Blood culture	2022	UK	ERR12371475	PRJEB68199	Dataset 1, 2 and 3	This study
gas1805195	M1UK	Information not provided	2022	UK	ERR12371476	PRJEB68199	Dataset 1, 2 and 3	This study
gas1805196	M1UK	Information not provided	2022	UK	ERR12371477	PRJEB68199	Dataset 1, 2 and 3	This study
gas1805201	M1UK	Blood culture	2022	UK	ERR12371478	PRJEB68199	Dataset 1, 2 and 3	This study
gas1805202	M1UK	Wound swab	2022	UK	ERR12371479	PRJEB68199	Dataset 1, 2 and 3	This study
gas1805207	M1UK	Blood culture	2022	UK	ERR12371480	PRJEB68199	Dataset 1, 2 and 3	This study
gas1805208	M1UK	Blood culture	2022	UK	ERR12371481	PRJEB68199	Dataset 1, 2 and 3	This study
gas1805209	M1UK	Blood culture	2022	UK	ERR12371482	PRJEB68199	Dataset 1, 2 and 3	This study
gas1805213	M1UK	Throat swab	2022	UK	ERR12371483	PRJEB68199	Dataset 1, 2 and 3	This study
gas1805215	M1UK	Sputum	2022	UK	ERR12371484	PRJEB68199	Dataset 1, 2 and 3	This study
gas1805219	M1UK	Information not provided	2022	UK	ERR12371485	PRJEB68199	Dataset 1, 2 and 3	This study
gas1805221	26 SNPs	Pleural fluid	2022	UK	ERR12371486	PRJEB68199	Dataset 1, 2 and 3	This study
gas1805222	M1UK	Blood culture	2022	UK	ERR12371487	PRJEB68199	Dataset 1, 2 and 3	This study
gas1805223	M1UK	Pleural fluid	2022	UK	ERR12371488	PRJEB68199	Dataset 1, 2 and 3	This study
gas1805224	M1UK	Wound swab	2022	UK	ERR12371489	PRJEB68199	Dataset 1, 2 and 3	This study
gas1805225	M1UK	Blood culture	2022	UK	ERR12371490	PRJEB68199	Dataset 1, 2 and 3	This study
gas1805226	M1UK	Blood culture	2022	UK	ERR12371491	PRJEB68199	Dataset 1, 2 and 3	This study
gas1805229	M1UK	Sinus aspirate	2022	UK	ERR12371492	PRJEB68199	Dataset 1, 2 and 3	This study
gas1805233	M1UK	Pus	2022	UK	ERR12371493	PRJEB68199	Dataset 1, 2 and 3	This study
gas1805235	M1UK	Tissue	2022	UK	ERR12371494	PRJEB68199	Dataset 1, 2 and 3	This study
gas1805236	M1UK	Information not provided	2022	UK	ERR12371495	PRJEB68199	Dataset 1, 2 and 3	This study
gas1805237	M1UK	Blood culture	2022	UK	ERR12371496	PRJEB68199	Dataset 1, 2 and 3	This study
gas1805240	M1UK	Blood culture	2022	UK	ERR12371497	PRJEB68199	Dataset 1, 2 and 3	This study
gas1805241	M1UK	Blood culture	2022	UK	ERR12371498	PRJEB68199	Dataset 1, 2 and 3	This study
gas1805242	M1UK	Blood culture	2022	UK	ERR12371499	PRJEB68199	Dataset 1, 2 and 3	This study
gas1805249	M1UK	Blood	2022	UK	ERR12371500	PRJEB68199	Dataset 1, 2 and 3	This study
gas1808234	M1UK	Fluid (joint)	2022	UK	ERR12371501	PRJEB68199	Dataset 1, 2 and 3	This study
gas1808236	M1UK	Pleural fluid	2022	UK	ERR12371502	PRJEB68199	Dataset 1, 2 and 3	This study
gas1808237	26 SNPs	Lymph node	2022	UK	ERR12371503	PRJEB68199	Dataset 1, 2 and 3	This study
gas1808240	M1UK	Blood culture	2022	UK	ERR12371504	PRJEB68199	Dataset 1, 2 and 3	This study
gas1808243	M1UK	Pleural fluid	2022	UK	ERR12371505	PRJEB68199	Dataset 1, 2 and 3	This study
gas1808244	M1UK	Blood culture	2022	UK	ERR12371506	PRJEB68199	Dataset 1, 2 and 3	This study
gas1808245	M1UK	Blood culture	2022	UK	ERR12371507	PRJEB68199	Dataset 1, 2 and 3	This study
gas1808250	M1UK	Blood culture	2022	UK	ERR12371508	PRJEB68199	Dataset 1, 2 and 3	This study
gas1808252	M1UK	Information not provided	2022	UK	ERR12371509	PRJEB68199	Dataset 1, 2 and 3	This study
gas1808254	M1UK	Blood culture	2022	UK	ERR12371510	PRJEB68199	Dataset 1, 2 and 3	This study
gas1808255	M1Global	Blood culture	2022	UK	ERR12371511	PRJEB68199	Dataset 1 and 2	This study
gas1808256	M1UK	Blood culture	2022	UK	ERR12371512	PRJEB68199	Dataset 1, 2 and 3	This study
gas1808258	M1UK	Pus	2022	UK	ERR12371513	PRJEB68199	Dataset 1, 2 and 3	This study
gas1808259	M1UK	Nasopharyngeal aspirate	2022	UK	ERR12371514	PRJEB68199	Dataset 1, 2 and 3	This study
gas1808260	M1UK	Blood culture	2022	UK	ERR12371515	PRJEB68199	Dataset 1, 2 and 3	This study
gas1808261	M1UK	Blood culture	2022	UK	ERR12371516	PRJEB68199	Dataset 1, 2 and 3	This study
gas1808264	M1UK	Throat swab	2022	UK	ERR12371517	PRJEB68199	Dataset 1, 2 and 3	This study
gas1808266	M1UK	Pus	2022	UK	ERR12371518	PRJEB68199	Dataset 1, 2 and 3	This study
gas1808269	M1UK	Blood culture	2022	UK	ERR12371519	PRJEB68199	Dataset 1, 2 and 3	This study
gas1808271	M1UK	Blood culture	2022	UK	ERR12371520	PRJEB68199	Dataset 1, 2 and 3	This study
gas1808272	M1UK	Blood culture	2022	UK	ERR12371521	PRJEB68199	Dataset 1, 2 and 3	This study
gas1808275	M1UK	Abscess	2022	UK	ERR12371522	PRJEB68199	Dataset 1, 2 and 3	This study
gas1808276	M1UK	Blood culture	2022	UK	ERR12371523	PRJEB68199	Dataset 1, 2 and 3	This study
gas1808279	M1UK	Blood culture	2022	UK	ERR12371524	PRJEB68199	Dataset 1, 2 and 3	This study
gas1808282	M1UK	Blood culture	2022	UK	ERR12371525	PRJEB68199	Dataset 1, 2 and 3	This study
gas1808284	M1UK	Blood culture	2022	UK	ERR12371526	PRJEB68199	Dataset 1, 2 and 3	This study
gas1808285	M1UK	Swab	2022	UK	ERR12371527	PRJEB68199	Dataset 1, 2 and 3	This study
gas1808288	M1UK	Blood culture	2022	UK	ERR12371528	PRJEB68199	Dataset 1, 2 and 3	This study
gas1808290	M1UK	Blood culture	2022	UK	ERR12371529	PRJEB68199	Dataset 1, 2 and 3	This study
gas1808293	M1UK	Blood culture	2022	UK	ERR12371530	PRJEB68199	Dataset 1, 2 and 3	This study
gas1808296	M1UK	Blood culture	2022	UK	ERR12371531	PRJEB68199	Dataset 1, 2 and 3	This study
gas1808299	M1UK	Blood culture	2022	UK	ERR12371532	PRJEB68199	Dataset 1, 2 and 3	This study
gas1808306	M1UK	Tissue	2022	UK	ERR12371533	PRJEB68199	Dataset 1, 2 and 3	This study
gas1808310	M1UK	Blood culture	2022	UK	ERR12371534	PRJEB68199	Dataset 1, 2 and 3	This study
gas1808312	M1UK	Throat swab	2022	UK	ERR12371535	PRJEB68199	Dataset 1, 2 and 3	This study
gas1808313	M1UK	Blood culture	2022	UK	ERR12371536	PRJEB68199	Dataset 1, 2 and 3	This study
gas1808315	M1UK	Pleural fluid	2022	UK	ERR12371537	PRJEB68199	Dataset 1, 2 and 3	This study
gas1808316	M1UK	Blood culture	2022	UK	ERR12371538	PRJEB68199	Dataset 1, 2 and 3	This study
gas1808322	M1UK	Blood culture	2022	UK	ERR12371539	PRJEB68199	Dataset 1, 2 and 3	This study
gas1808323	M1UK	Blood culture	2022	UK	ERR12371540	PRJEB68199	Dataset 1, 2 and 3	This study
gas1808328	M1Global	Bronchial alveolar lavage	2022	UK	ERR12371541	PRJEB68199	Dataset 1 and 2	This study
gas1809864	M1UK	Blood culture	2022	UK	ERR12371542	PRJEB68199	Dataset 1, 2 and 3	This study
gas1809866	M1UK	Blood culture	2022	UK	ERR12371543	PRJEB68199	Dataset 1, 2 and 3	This study
gas1809874	M1UK	Blood culture	2022	UK	ERR12371544	PRJEB68199	Dataset 1, 2 and 3	This study
gas1809878	M1UK	Blood culture	2022	UK	ERR12371545	PRJEB68199	Dataset 1, 2 and 3	This study
gas1809880	M1UK	Blood culture	2022	UK	ERR12371546	PRJEB68199	Dataset 1, 2 and 3	This study
gas1809881	M1UK	Blood culture	2022	UK	ERR12371547	PRJEB68199	Dataset 1, 2 and 3	This study
gas1809884	M1UK	Blood culture	2022	UK	ERR12371548	PRJEB68199	Dataset 1, 2 and 3	This study
gas1809888	M1UK	Blood culture	2022	UK	ERR12371549	PRJEB68199	Dataset 1, 2 and 3	This study
gas1809889	M1UK	Nose	2022	UK	ERR12371550	PRJEB68199	Dataset 1, 2 and 3	This study
gas1809891	M1UK	Blood culture	2022	UK	ERR12371551	PRJEB68199	Dataset 1, 2 and 3	This study
gas1809894	26 SNPs	Pus	2022	UK	ERR12371552	PRJEB68199	Dataset 1, 2 and 3	This study
gas1809895	M1UK	Blood culture	2022	UK	ERR12371553	PRJEB68199	Dataset 1, 2 and 3	This study
gas1809898	M1UK	Blood culture	2022	UK	ERR12371554	PRJEB68199	Dataset 1, 2 and 3	This study
gas1809903	M1UK	Blood culture	2022	UK	ERR12371555	PRJEB68199	Dataset 1, 2 and 3	This study
gas1809904	M1Global	Biopsy from lung	2022	UK	ERR12371556	PRJEB68199	Dataset 1 and 2	This study
gas1809905	M1UK	Blood culture	2022	UK	ERR12371557	PRJEB68199	Dataset 1, 2 and 3	This study
gas1809909	M1UK	Blood culture	2022	UK	ERR12371558	PRJEB68199	Dataset 1, 2 and 3	This study
gas1809911	M1UK	Blood culture	2022	UK	ERR12371559	PRJEB68199	Dataset 1, 2 and 3	This study
gas1809912	M1UK	Blood culture	2022	UK	ERR12371560	PRJEB68199	Dataset 1, 2 and 3	This study
gas1809914	M1UK	Blood culture	2022	UK	ERR12371561	PRJEB68199	Dataset 1, 2 and 3	This study
gas1809915	M1UK	Pleural fluid	2022	UK	ERR12371562	PRJEB68199	Dataset 1, 2 and 3	This study
gas1809916	M1UK	Blood culture	2022	UK	ERR12371563	PRJEB68199	Dataset 1, 2 and 3	This study
gas1809920	M1UK	Blood culture	2022	UK	ERR12371564	PRJEB68199	Dataset 1, 2 and 3	This study
gas1809924	M1UK	Tissue	2022	UK	ERR12371565	PRJEB68199	Dataset 1, 2 and 3	This study
gas1809932	M1UK	Blood culture	2022	UK	ERR12371566	PRJEB68199	Dataset 1, 2 and 3	This study
gas1809934	M1UK	Blood culture	2022	UK	ERR12371567	PRJEB68199	Dataset 1, 2 and 3	This study
gas1809936	M1UK	Blood culture	2022	UK	ERR12371568	PRJEB68199	Dataset 1, 2 and 3	This study
gas1809940	M1UK	Blood culture	2022	UK	ERR12371569	PRJEB68199	Dataset 1, 2 and 3	This study
gas1809944	M1UK	Pleural fluid	2022	UK	ERR12371570	PRJEB68199	Dataset 1, 2 and 3	This study
gas1809945	M1UK	Throat swab	2022	UK	ERR12371571	PRJEB68199	Dataset 1, 2 and 3	This study
gas1809946	M1UK	Blood culture	2022	UK	ERR12371572	PRJEB68199	Dataset 1, 2 and 3	This study
gas1809948	M1UK	Pus	2022	UK	ERR12371573	PRJEB68199	Dataset 1, 2 and 3	This study
gas1809952	M1UK	Blood culture	2022	UK	ERR12371574	PRJEB68199	Dataset 1, 2 and 3	This study
gas1809953	M1Global	Blood culture	2022	UK	ERR12371575	PRJEB68199	Dataset 1 and 2	This study
gas1811113	M1UK	Blood culture	2022	UK	ERR12371576	PRJEB68199	Dataset 1, 2 and 3	This study
gas1811114	M1UK	Blood culture	2022	UK	ERR12371577	PRJEB68199	Dataset 1, 2 and 3	This study
gas1811115	M1UK	Tissue	2022	UK	ERR12371578	PRJEB68199	Dataset 1, 2 and 3	This study
gas1811117	M1UK	Blood culture	2022	UK	ERR12371579	PRJEB68199	Dataset 1, 2 and 3	This study
gas1811118	M1UK	Blood culture	2022	UK	ERR12371580	PRJEB68199	Dataset 1, 2 and 3	This study
gas1811121	M1UK	Blood culture	2022	UK	ERR12371581	PRJEB68199	Dataset 1, 2 and 3	This study
gas1811122	M1UK	Blood culture	2022	UK	ERR12371582	PRJEB68199	Dataset 1, 2 and 3	This study
gas1811126	M1UK	Blood culture	2022	UK	ERR12371583	PRJEB68199	Dataset 1, 2 and 3	This study
gas1811128	M1UK	Blood culture	2022	UK	ERR12371584	PRJEB68199	Dataset 1, 2 and 3	This study
gas1811129	M1UK	Blood culture	2022	UK	ERR12371585	PRJEB68199	Dataset 1, 2 and 3	This study
gas1811131	M1UK	Blood culture	2022	UK	ERR12371586	PRJEB68199	Dataset 1, 2 and 3	This study
gas1811132	M1Global	Blood culture	2022	UK	ERR12371587	PRJEB68199	Dataset 1 and 2	This study
gas1811133	M1UK	Blood culture	2022	UK	ERR12371588	PRJEB68199	Dataset 1, 2 and 3	This study
gas1811135	M1UK	Blood culture	2022	UK	ERR12371589	PRJEB68199	Dataset 1, 2 and 3	This study
gas1811136	M1UK	Sputum	2022	UK	ERR12371590	PRJEB68199	Dataset 1, 2 and 3	This study
gas1811139	M1UK	Blood culture	2022	UK	ERR12371591	PRJEB68199	Dataset 1, 2 and 3	This study
gas1811141	M1UK	Pleural aspirate	2022	UK	ERR12371592	PRJEB68199	Dataset 1, 2 and 3	This study
gas1811143	M1UK	Blood culture	2022	UK	ERR12371593	PRJEB68199	Dataset 1, 2 and 3	This study
gas1811144	M1UK	Blood culture	2022	UK	ERR12371594	PRJEB68199	Dataset 1, 2 and 3	This study
gas1811147	M1UK	Blood culture	2022	UK	ERR12371595	PRJEB68199	Dataset 1, 2 and 3	This study
gas1811148	M1UK	Blood culture	2022	UK	ERR12371596	PRJEB68199	Dataset 1, 2 and 3	This study
gas1811149	M1UK	Blood culture	2022	UK	ERR12371597	PRJEB68199	Dataset 1, 2 and 3	This study
gas1811153	M1Global	Blood culture	2022	UK	ERR12371598	PRJEB68199	Dataset 1 and 2	This study
gas1811155	M1UK	Blood culture	2022	UK	ERR12371599	PRJEB68199	Dataset 1, 2 and 3	This study
gas1811157	M1UK	Blood culture	2022	UK	ERR12371600	PRJEB68199	Dataset 1, 2 and 3	This study
gas1811161	M1UK	Blood culture	2022	UK	ERR12371601	PRJEB68199	Dataset 1, 2 and 3	This study
gas1811162	M1UK	Blood culture	2022	UK	ERR12371602	PRJEB68199	Dataset 1, 2 and 3	This study
gas1811165	M1UK	Blood culture	2022	UK	ERR12371603	PRJEB68199	Dataset 1, 2 and 3	This study
gas1811166	M1UK	Blood culture	2022	UK	ERR12371604	PRJEB68199	Dataset 1, 2 and 3	This study
gas1811168	M1UK	Eye swab	2022	UK	ERR12371605	PRJEB68199	Dataset 1, 2 and 3	This study
gas1811171	M1UK	Blood culture	2022	UK	ERR12371606	PRJEB68199	Dataset 1, 2 and 3	This study
gas1811173	M1Global	Blood culture	2022	UK	ERR12371607	PRJEB68199	Dataset 1 and 2	This study
gas1811174	M1Global	Blood culture	2022	UK	ERR12371608	PRJEB68199	Dataset 1 and 2	This study
gas1811175	M1UK	Blood culture	2022	UK	ERR12371609	PRJEB68199	Dataset 1, 2 and 3	This study
gas1811176	M1UK	Throat swab	2022	UK	ERR12371610	PRJEB68199	Dataset 1, 2 and 3	This study
gas1811178	M1UK	Sputum	2022	UK	ERR12371611	PRJEB68199	Dataset 1, 2 and 3	This study
gas1811179	M1UK	Blood culture	2022	UK	ERR12371612	PRJEB68199	Dataset 1, 2 and 3	This study
gas1811180	22 SNPs	Bronchial alveolar lavage	2022	UK	ERR12371613	PRJEB68199	Dataset 1, 2 and 3	This study
gas1811183	M1UK	Blood culture	2022	UK	ERR12371614	PRJEB68199	Dataset 1, 2 and 3	This study
gas1811184	M1UK	Blood culture	2022	UK	ERR12371615	PRJEB68199	Dataset 1, 2 and 3	This study
gas1811187	M1UK	Blood culture	2022	UK	ERR12371616	PRJEB68199	Dataset 1, 2 and 3	This study
gas1811190	M1UK	Pleural fluid	2022	UK	ERR12371617	PRJEB68199	Dataset 1, 2 and 3	This study
gas1811191	M1UK	Blood culture	2022	UK	ERR12371618	PRJEB68199	Dataset 1, 2 and 3	This study
gas1811192	M1UK	Blood culture	2022	UK	ERR12371619	PRJEB68199	Dataset 1, 2 and 3	This study
gas1811193	M1Global	Tissue	2022	UK	ERR12371620	PRJEB68199	Dataset 1 and 2	This study
gas1811194	M1UK	Throat swab	2022	UK	ERR12371621	PRJEB68199	Dataset 1, 2 and 3	This study
gas1811195	M1UK	Blood culture	2022	UK	ERR12371622	PRJEB68199	Dataset 1, 2 and 3	This study
gas1811200	M1UK	Blood culture	2022	UK	ERR12371623	PRJEB68199	Dataset 1, 2 and 3	This study
gas1811202	M1UK	Blood culture	2022	UK	ERR12371624	PRJEB68199	Dataset 1, 2 and 3	This study
gas1811203	M1UK	Ear swab	2022	UK	ERR12371625	PRJEB68199	Dataset 1, 2 and 3	This study
gas1811204	M1UK	Blood culture	2022	UK	ERR12371626	PRJEB68199	Dataset 1, 2 and 3	This study
gas1811205	M1UK	Blood culture	2022	UK	ERR12371627	PRJEB68199	Dataset 1, 2 and 3	This study
gas1811206	M1UK	Blood culture	2022	UK	ERR12371628	PRJEB68199	Dataset 1, 2 and 3	This study
gas1811207	26 SNPs	Blood culture	2022	UK	ERR12371629	PRJEB68199	Dataset 1, 2 and 3	This study
gas1812293	M1UK	Throat swab	2022	UK	ERR12371630	PRJEB68199	Dataset 1, 2 and 3	This study
gas1812295	M1Global	Blood culture	2022	UK	ERR12371631	PRJEB68199	Dataset 1 and 2	This study
gas1812297	M1UK	Blood culture	2022	UK	ERR12371632	PRJEB68199	Dataset 1, 2 and 3	This study
gas1812298	M1UK	Blood culture	2022	UK	ERR12371633	PRJEB68199	Dataset 1, 2 and 3	This study
gas1812299	M1UK	Blood culture	2022	UK	ERR12371634	PRJEB68199	Dataset 1, 2 and 3	This study
gas1812301	M1UK	Blood culture	2022	UK	ERR12371635	PRJEB68199	Dataset 1, 2 and 3	This study
gas1812302	M1UK	Blood culture	2022	UK	ERR12371636	PRJEB68199	Dataset 1, 2 and 3	This study
gas1812303	M1UK	Blood culture	2022	UK	ERR12371637	PRJEB68199	Dataset 1, 2 and 3	This study
gas1812304	M1Global	Pleural fluid	2022	UK	ERR12371638	PRJEB68199	Dataset 1 and 2	This study
gas1812305	M1UK	Pleural fluid	2022	UK	ERR12371639	PRJEB68199	Dataset 1, 2 and 3	This study
gas1812308	M1UK	Blood culture	2022	UK	ERR12371640	PRJEB68199	Dataset 1, 2 and 3	This study
gas1812309	M1UK	Blood culture	2022	UK	ERR12371641	PRJEB68199	Dataset 1, 2 and 3	This study
gas1812311	M1UK	Blood culture	2022	UK	ERR12371642	PRJEB68199	Dataset 1, 2 and 3	This study
gas1812315	M1UK	Blood culture	2022	UK	ERR12371643	PRJEB68199	Dataset 1, 2 and 3	This study
gas1812317	M1UK	Pleural fluid	2022	UK	ERR12371644	PRJEB68199	Dataset 1, 2 and 3	This study
gas1812318	M1UK	Blood culture	2022	UK	ERR12371645	PRJEB68199	Dataset 1, 2 and 3	This study
gas1812320	M1UK	Blood culture	2022	UK	ERR12371646	PRJEB68199	Dataset 1, 2 and 3	This study
gas1812321	M1UK	Blood culture	2022	UK	ERR12371647	PRJEB68199	Dataset 1, 2 and 3	This study
gas1812322	M1UK	Throat swab	2022	UK	ERR12371648	PRJEB68199	Dataset 1, 2 and 3	This study
gas1812323	M1UK	Blood culture	2022	UK	ERR12371649	PRJEB68199	Dataset 1, 2 and 3	This study
gas1812324	M1Global	Blood culture	2022	UK	ERR12371650	PRJEB68199	Dataset 1 and 2	This study
gas1812325	M1UK	Blood culture	2022	UK	ERR12371651	PRJEB68199	Dataset 1, 2 and 3	This study
gas1812326	M1UK	Blood culture	2022	UK	ERR12371652	PRJEB68199	Dataset 1, 2 and 3	This study
gas1812327	M1UK	Blood culture	2022	UK	ERR12371653	PRJEB68199	Dataset 1, 2 and 3	This study
gas1812328	M1UK	Blood culture	2022	UK	ERR12371654	PRJEB68199	Dataset 1, 2 and 3	This study
gas1812329	M1UK	Bronchial alveolar lavage	2022	UK	ERR12371655	PRJEB68199	Dataset 1, 2 and 3	This study
gas1812332	M1UK	Blood culture	2022	UK	ERR12371656	PRJEB68199	Dataset 1, 2 and 3	This study
gas1812336	M1UK	Blood culture	2022	UK	ERR12371657	PRJEB68199	Dataset 1, 2 and 3	This study
gas1812337	M1UK	nan	2022	UK	ERR12371658	PRJEB68199	Dataset 1, 2 and 3	This study
gas1812339	M1UK	Blood culture	2022	UK	ERR12371659	PRJEB68199	Dataset 1, 2 and 3	This study
gas1812342	M1UK	Blood culture	2022	UK	ERR12371660	PRJEB68199	Dataset 1, 2 and 3	This study
gas1812344	M1UK	Pleural fluid	2022	UK	ERR12371661	PRJEB68199	Dataset 1, 2 and 3	This study
gas1812345	M1Global	Blood culture	2022	UK	ERR12371662	PRJEB68199	Dataset 1 and 2	This study
gas1812347	M1UK	Abscess	2022	UK	ERR12371663	PRJEB68199	Dataset 1, 2 and 3	This study
gas1812348	M1UK	nan	2022	UK	ERR12371664	PRJEB68199	Dataset 1, 2 and 3	This study
gas1812351	M1UK	Information not provided	2022	UK	ERR12371665	PRJEB68199	Dataset 1, 2 and 3	This study
gas1812353	M1UK	Blood culture	2022	UK	ERR12371666	PRJEB68199	Dataset 1, 2 and 3	This study
gas1812354	M1UK	Information not provided	2022	UK	ERR12371667	PRJEB68199	Dataset 1, 2 and 3	This study
gas1812355	M1Global	Blood culture	2022	UK	ERR12371668	PRJEB68199	Dataset 1 and 2	This study
gas1812359	M1UK	Pus	2022	UK	ERR12371669	PRJEB68199	Dataset 1, 2 and 3	This study
gas1812360	M1UK	Throat swab	2022	UK	ERR12371670	PRJEB68199	Dataset 1, 2 and 3	This study
gas1812361	M1UK	Blood culture	2022	UK	ERR12371671	PRJEB68199	Dataset 1, 2 and 3	This study
gas1812365	M1UK	Blood culture	2022	UK	ERR12371672	PRJEB68199	Dataset 1, 2 and 3	This study
gas1812366	M1UK	Blood culture	2022	UK	ERR12371673	PRJEB68199	Dataset 1, 2 and 3	This study
gas1812367	M1Global	Blood culture	2022	UK	ERR12371674	PRJEB68199	Dataset 1 and 2	This study
gas1812369	M1UK	Blood culture	2022	UK	ERR12371675	PRJEB68199	Dataset 1, 2 and 3	This study
gas1812371	M1UK	Blood culture	2022	UK	ERR12371676	PRJEB68199	Dataset 1, 2 and 3	This study
gas1812373	26 SNPs	Blood culture	2022	UK	ERR12371677	PRJEB68199	Dataset 1, 2 and 3	This study
gas1812374	M1UK	Blood culture	2022	UK	ERR12371678	PRJEB68199	Dataset 1, 2 and 3	This study
gas1812377	26 SNPs	Pleural fluid	2022	UK	ERR12371679	PRJEB68199	Dataset 1, 2 and 3	This study
gas1812378	M1UK	Pleural fluid	2022	UK	ERR12371680	PRJEB68199	Dataset 1, 2 and 3	This study
gas1812379	M1UK	Blood culture	2022	UK	ERR12371681	PRJEB68199	Dataset 1, 2 and 3	This study
gas1812380	M1UK	Blood culture	2022	UK	ERR12371682	PRJEB68199	Dataset 1, 2 and 3	This study
gas1812382	M1Global	Blood culture	2022	UK	ERR12371683	PRJEB68199	Dataset 1 and 2	This study
gas1812385	M1UK	Blood culture	2022	UK	ERR12371684	PRJEB68199	Dataset 1, 2 and 3	This study
gas1812386	M1UK	Blood culture	2022	UK	ERR12371685	PRJEB68199	Dataset 1, 2 and 3	This study
gas1819393	M1UK	Tissue	2022	UK	ERR12371686	PRJEB68199	Dataset 1, 2 and 3	This study
gas1819394	M1UK	Blood culture	2022	UK	ERR12371687	PRJEB68199	Dataset 1, 2 and 3	This study
gas1819395	M1UK	Blood culture	2022	UK	ERR12371688	PRJEB68199	Dataset 1, 2 and 3	This study
gas1819396	M1UK	Blood culture	2022	UK	ERR12371689	PRJEB68199	Dataset 1, 2 and 3	This study
gas1819397	M1UK	Fluid	2022	UK	ERR12371690	PRJEB68199	Dataset 1, 2 and 3	This study
gas1819398	M1UK	Tissue	2022	UK	ERR12371691	PRJEB68199	Dataset 1, 2 and 3	This study
gas1819402	M1UK	Pus	2022	UK	ERR12371692	PRJEB68199	Dataset 1, 2 and 3	This study
gas1819405	M1UK	Blood culture	2023	UK	ERR12371693	PRJEB68199	Dataset 1, 2 and 3	This study
gas1819406	M1UK	Foetal liver	2022	UK	ERR12371694	PRJEB68199	Dataset 1, 2 and 3	This study
gas1819408	M1UK	Blood culture	2022	UK	ERR12371695	PRJEB68199	Dataset 1, 2 and 3	This study
gas1819409	M1UK	Blood culture	2022	UK	ERR12371696	PRJEB68199	Dataset 1, 2 and 3	This study
gas1819410	M1UK	Blood culture	2022	UK	ERR12371697	PRJEB68199	Dataset 1, 2 and 3	This study
gas1819412	M1UK	Pleural fluid	2022	UK	ERR12371698	PRJEB68199	Dataset 1, 2 and 3	This study
gas1819414	M1UK	Blood culture	2022	UK	ERR12371699	PRJEB68199	Dataset 1, 2 and 3	This study
gas1819415	M1UK	Pleural fluid	2022	UK	ERR12371700	PRJEB68199	Dataset 1, 2 and 3	This study
gas1819418	M1UK	Blood culture	2022	UK	ERR12371701	PRJEB68199	Dataset 1, 2 and 3	This study
gas1819421	M1UK	Blood culture	2022	UK	ERR12371702	PRJEB68199	Dataset 1, 2 and 3	This study
gas1819422	M1UK	Blood culture	2022	UK	ERR12371703	PRJEB68199	Dataset 1, 2 and 3	This study
gas1819423	M1UK	Blood culture	2022	UK	ERR12371704	PRJEB68199	Dataset 1, 2 and 3	This study
gas1819424	M1UK	Blood culture	2022	UK	ERR12371705	PRJEB68199	Dataset 1, 2 and 3	This study
gas1819426	M1UK	Blood culture	2022	UK	ERR12371706	PRJEB68199	Dataset 1, 2 and 3	This study
gas1819429	M1UK	Blood culture	2022	UK	ERR12371707	PRJEB68199	Dataset 1, 2 and 3	This study
gas1819431	M1UK	Throat swab	2022	UK	ERR12371708	PRJEB68199	Dataset 1, 2 and 3	This study
gas1819432	M1UK	Blood culture	2022	UK	ERR12371709	PRJEB68199	Dataset 1, 2 and 3	This study
gas1819433	26 SNPs	Throat swab	2022	UK	ERR12371710	PRJEB68199	Dataset 1, 2 and 3	This study
gas1819434	M1UK	Pleural fluid	2022	UK	ERR12371711	PRJEB68199	Dataset 1, 2 and 3	This study
gas1819435	M1UK	Blood culture	2022	UK	ERR12371712	PRJEB68199	Dataset 1, 2 and 3	This study
gas1819437	M1UK	Blood culture	2022	UK	ERR12371713	PRJEB68199	Dataset 1, 2 and 3	This study
gas1819438	M1UK	Extradural	2022	UK	ERR12371714	PRJEB68199	Dataset 1, 2 and 3	This study
gas1819439	M1UK	Blood culture	2023	UK	ERR12371715	PRJEB68199	Dataset 1, 2 and 3	This study
gas1819440	M1UK	Peritoneal fl	2022	UK	ERR12371716	PRJEB68199	Dataset 1, 2 and 3	This study
gas1819442	M1UK	Blood culture	2022	UK	ERR12371717	PRJEB68199	Dataset 1, 2 and 3	This study
gas1819443	M1UK	Blood culture	2022	UK	ERR12371718	PRJEB68199	Dataset 1, 2 and 3	This study
gas1819445	M1UK	Empyema sample	2022	UK	ERR12371719	PRJEB68199	Dataset 1, 2 and 3	This study
gas1819448	M1UK	Blood culture	2022	UK	ERR12371720	PRJEB68199	Dataset 1, 2 and 3	This study
gas1819451	M1UK	Blood culture	2022	UK	ERR12371721	PRJEB68199	Dataset 1, 2 and 3	This study
gas1819452	M1UK	Blood culture	2022	UK	ERR12371722	PRJEB68199	Dataset 1, 2 and 3	This study
gas1819453	M1UK	Blood culture	2022	UK	ERR12371723	PRJEB68199	Dataset 1, 2 and 3	This study
gas1819454	M1UK	Blood culture	2022	UK	ERR12371724	PRJEB68199	Dataset 1, 2 and 3	This study
gas1819456	M1UK	Blood culture	2022	UK	ERR12371725	PRJEB68199	Dataset 1, 2 and 3	This study
gas1819457	M1UK	Swab	2023	UK	ERR12371726	PRJEB68199	Dataset 1, 2 and 3	This study
gas1819458	M1UK	Blood culture	2022	UK	ERR12371727	PRJEB68199	Dataset 1, 2 and 3	This study
gas1819460	M1UK	Blood culture	2022	UK	ERR12371728	PRJEB68199	Dataset 1, 2 and 3	This study
gas1819461	M1UK	Tissue	2022	UK	ERR12371729	PRJEB68199	Dataset 1, 2 and 3	This study
gas1819463	M1UK	Pleural fluid	2022	UK	ERR12371730	PRJEB68199	Dataset 1, 2 and 3	This study
gas1819464	26 SNPs	Blood culture	2022	UK	ERR12371731	PRJEB68199	Dataset 1, 2 and 3	This study
gas1819465	M1UK	Blood culture	2022	UK	ERR12371732	PRJEB68199	Dataset 1, 2 and 3	This study
gas1819466	M1UK	Throat swab	2022	UK	ERR12371733	PRJEB68199	Dataset 1, 2 and 3	This study
gas1819467	M1UK	Blood culture	2022	UK	ERR12371734	PRJEB68199	Dataset 1, 2 and 3	This study
gas1819468	M1UK	Blood culture	2022	UK	ERR12371735	PRJEB68199	Dataset 1, 2 and 3	This study
gas1819469	M1UK	Bronchial alveolar lavage	2022	UK	ERR12371736	PRJEB68199	Dataset 1, 2 and 3	This study
gas1819470	26 SNPs	Pleural fluid	2022	UK	ERR12371737	PRJEB68199	Dataset 1, 2 and 3	This study
gas1819473	M1UK	Throat swab	2022	UK	ERR12371738	PRJEB68199	Dataset 1, 2 and 3	This study
gas1819474	M1UK	Blood culture	2022	UK	ERR12371739	PRJEB68199	Dataset 1, 2 and 3	This study
gas1819475	M1UK	Blood culture	2022	UK	ERR12371740	PRJEB68199	Dataset 1, 2 and 3	This study
gas1819479	M1UK	Blood culture	2022	UK	ERR12371741	PRJEB68199	Dataset 1, 2 and 3	This study
gas1819480	M1UK	Blood culture	2022	UK	ERR12371742	PRJEB68199	Dataset 1, 2 and 3	This study
gas1819484	M1UK	Blood culture	2022	UK	ERR12371743	PRJEB68199	Dataset 1, 2 and 3	This study
gas1819774	M1UK	Throat swab	2022	UK	ERR12371744	PRJEB68199	Dataset 1, 2 and 3	This study
gas1819775	M1UK	Pleural fluid	2022	UK	ERR12371745	PRJEB68199	Dataset 1, 2 and 3	This study
gas1819778	M1UK	Tissue	2022	UK	ERR12371746	PRJEB68199	Dataset 1, 2 and 3	This study
gas1819779	M1UK	Blood culture	2022	UK	ERR12371747	PRJEB68199	Dataset 1, 2 and 3	This study
gas1819780	M1UK	Blood culture	2022	UK	ERR12371748	PRJEB68199	Dataset 1, 2 and 3	This study
gas1819781	M1UK	Pleural fluid	2022	UK	ERR12371749	PRJEB68199	Dataset 1, 2 and 3	This study
gas1819783	M1UK	Pleural fluid	2022	UK	ERR12371750	PRJEB68199	Dataset 1, 2 and 3	This study
gas1819789	M1UK	Throat swab	2022	UK	ERR12371751	PRJEB68199	Dataset 1, 2 and 3	This study
gas1819790	M1UK	Blood culture	2022	UK	ERR12371752	PRJEB68199	Dataset 1, 2 and 3	This study
gas1819791	M1UK	Blood culture	2022	UK	ERR12371753	PRJEB68199	Dataset 1, 2 and 3	This study
gas1819793	M1UK	Throat swab	2022	UK	ERR12371754	PRJEB68199	Dataset 1, 2 and 3	This study
gas1819796	M1UK	Blood culture	2022	UK	ERR12371755	PRJEB68199	Dataset 1, 2 and 3	This study
gas1819798	M1UK	Tissue	2022	UK	ERR12371756	PRJEB68199	Dataset 1, 2 and 3	This study
gas1819803	M1UK	Blood culture	2022	UK	ERR12371757	PRJEB68199	Dataset 1, 2 and 3	This study
gas1819806	M1UK	Pleural fluid	2022	UK	ERR12371758	PRJEB68199	Dataset 1, 2 and 3	This study
gas1819812	M1UK	Blood culture	2022	UK	ERR12371759	PRJEB68199	Dataset 1, 2 and 3	This study
gas1819813	M1UK	Wound swab	2022	UK	ERR12371760	PRJEB68199	Dataset 1, 2 and 3	This study
gas1819816	M1UK	Blood culture	2022	UK	ERR12371761	PRJEB68199	Dataset 1, 2 and 3	This study
gas1819818	M1UK	Blood culture	2022	UK	ERR12371762	PRJEB68199	Dataset 1, 2 and 3	This study
gas1819819	M1UK	Throat swab	2022	UK	ERR12371763	PRJEB68199	Dataset 1, 2 and 3	This study
gas1819820	M1UK	Blood culture	2022	UK	ERR12371764	PRJEB68199	Dataset 1, 2 and 3	This study
gas1819821	M1UK	Blood culture	2022	UK	ERR12371765	PRJEB68199	Dataset 1, 2 and 3	This study
gas1819825	M1UK	Blood culture	2022	UK	ERR12371766	PRJEB68199	Dataset 1, 2 and 3	This study
gas1819826	M1UK	Throat swab	2022	UK	ERR12371767	PRJEB68199	Dataset 1, 2 and 3	This study
gas1819830	M1UK	Sputum	2022	UK	ERR12371768	PRJEB68199	Dataset 1, 2 and 3	This study
gas1819831	M1UK	Blood culture	2022	UK	ERR12371769	PRJEB68199	Dataset 1, 2 and 3	This study
gas1819832	M1UK	Throat swab	2022	UK	ERR12371770	PRJEB68199	Dataset 1, 2 and 3	This study
gas1819834	M1UK	Blood culture	2022	UK	ERR12371771	PRJEB68199	Dataset 1, 2 and 3	This study
gas1819836	M1UK	Throat swab	2022	UK	ERR12371772	PRJEB68199	Dataset 1, 2 and 3	This study
gas1819839	M1UK	Blood culture	2022	UK	ERR12371773	PRJEB68199	Dataset 1, 2 and 3	This study
gas1819843	M1UK	Blood culture	2022	UK	ERR12371774	PRJEB68199	Dataset 1, 2 and 3	This study
gas1819844	M1UK	Blood culture	2022	UK	ERR12371775	PRJEB68199	Dataset 1, 2 and 3	This study
gas1819845	M1UK	Blood culture	2022	UK	ERR12371776	PRJEB68199	Dataset 1, 2 and 3	This study
gas1819846	26 SNPs	Throat swab	2022	UK	ERR12371777	PRJEB68199	Dataset 1, 2 and 3	This study
gas1819847	M1UK	Throat swab	2022	UK	ERR12371778	PRJEB68199	Dataset 1, 2 and 3	This study
gas1819849	M1UK	Blood culture	2022	UK	ERR12371779	PRJEB68199	Dataset 1, 2 and 3	This study
gas1819851	M1UK	Blood culture	2022	UK	ERR12371780	PRJEB68199	Dataset 1, 2 and 3	This study
gas1819852	M1UK	Sputum	2022	UK	ERR12371781	PRJEB68199	Dataset 1, 2 and 3	This study
gas1819853	M1UK	Knee aspirate	2022	UK	ERR12371782	PRJEB68199	Dataset 1, 2 and 3	This study
gas1819854	M1UK	Blood culture	2022	UK	ERR12371783	PRJEB68199	Dataset 1, 2 and 3	This study
gas1819860	M1UK	Blood culture	2022	UK	ERR12371784	PRJEB68199	Dataset 1, 2 and 3	This study
gas1819863	26 SNPs	Throat swab	2022	UK	ERR12371785	PRJEB68199	Dataset 1, 2 and 3	This study
gas1819868	M1UK	Pleural fluid	2022	UK	ERR12371786	PRJEB68199	Dataset 1, 2 and 3	This study
gas1821526	M1UK	Blood culture	2023	UK	ERR12371787	PRJEB68199	Dataset 1, 2 and 3	This study
gas1821527	M1UK	Blood culture	2022	UK	ERR12371788	PRJEB68199	Dataset 1, 2 and 3	This study
gas1821529	M1UK	Tissue	2022	UK	ERR12371789	PRJEB68199	Dataset 1, 2 and 3	This study
gas1821531	M1Global	Blood culture	2022	UK	ERR12371790	PRJEB68199	Dataset 1 and 2	This study
gas1821532	M1UK	Blood culture	2022	UK	ERR12371791	PRJEB68199	Dataset 1, 2 and 3	This study
gas1821534	M1UK	Pus	2022	UK	ERR12371792	PRJEB68199	Dataset 1, 2 and 3	This study
gas1821535	26 SNPs	Fluid (joint)	2022	UK	ERR12371793	PRJEB68199	Dataset 1, 2 and 3	This study
gas1821537	M1UK	Blood culture	2022	UK	ERR12371794	PRJEB68199	Dataset 1, 2 and 3	This study
gas1821539	M1UK	Blood culture	2022	UK	ERR12371795	PRJEB68199	Dataset 1, 2 and 3	This study
gas1821540	M1UK	Swab	2022	UK	ERR12371796	PRJEB68199	Dataset 1, 2 and 3	This study
gas1821542	M1UK	Throat swab	2022	UK	ERR12371797	PRJEB68199	Dataset 1, 2 and 3	This study
gas1821543	M1UK	Tissue	2022	UK	ERR12371798	PRJEB68199	Dataset 1, 2 and 3	This study
gas1821544	M1UK	Blood culture	2022	UK	ERR12371799	PRJEB68199	Dataset 1, 2 and 3	This study
gas1821549	M1UK	Wound swab	2022	UK	ERR12371800	PRJEB68199	Dataset 1, 2 and 3	This study
gas1821553	M1UK	Blood culture	2022	UK	ERR12371801	PRJEB68199	Dataset 1, 2 and 3	This study
gas1821554	M1UK	Blood culture	2022	UK	ERR12371802	PRJEB68199	Dataset 1, 2 and 3	This study
gas1821555	M1UK	Vaginal swab	2022	UK	ERR12371803	PRJEB68199	Dataset 1, 2 and 3	This study
gas1821557	M1UK	Blood culture	2022	UK	ERR12371804	PRJEB68199	Dataset 1, 2 and 3	This study
gas1821558	M1UK	Blood culture	2022	UK	ERR12371805	PRJEB68199	Dataset 1, 2 and 3	This study
gas1821560	M1UK	Blood culture	2023	UK	ERR12371806	PRJEB68199	Dataset 1, 2 and 3	This study
gas1821561	M1UK	Blood culture	2022	UK	ERR12371807	PRJEB68199	Dataset 1, 2 and 3	This study
gas1821562	M1UK	Fluid	2022	UK	ERR12371808	PRJEB68199	Dataset 1, 2 and 3	This study
gas1821563	M1UK	Blood culture	2022	UK	ERR12371809	PRJEB68199	Dataset 1, 2 and 3	This study
gas1821564	M1UK	Information not provided	2022	UK	ERR12371810	PRJEB68199	Dataset 1, 2 and 3	This study
gas1821565	M1UK	Information not provided	2022	UK	ERR12371811	PRJEB68199	Dataset 1, 2 and 3	This study
gas1821566	M1UK	Blood culture	2023	UK	ERR12371812	PRJEB68199	Dataset 1, 2 and 3	This study
gas1821567	M1UK	Blood culture	2022	UK	ERR12371813	PRJEB68199	Dataset 1, 2 and 3	This study
gas1821569	M1UK	Blood culture	2022	UK	ERR12371814	PRJEB68199	Dataset 1, 2 and 3	This study
gas1821571	M1UK	Tissue	2022	UK	ERR12371815	PRJEB68199	Dataset 1, 2 and 3	This study
gas1821574	M1UK	Blood culture	2022	UK	ERR12371816	PRJEB68199	Dataset 1, 2 and 3	This study
gas1821575	M1UK	Ear swab	2022	UK	ERR12371817	PRJEB68199	Dataset 1, 2 and 3	This study
gas1821576	M1UK	Blood culture	2023	UK	ERR12371818	PRJEB68199	Dataset 1, 2 and 3	This study
gas1821581	M1UK	Blood culture	2023	UK	ERR12371819	PRJEB68199	Dataset 1, 2 and 3	This study
gas1821583	M1UK	Bone	2022	UK	ERR12371820	PRJEB68199	Dataset 1, 2 and 3	This study
gas1821590	M1UK	Blood culture	2023	UK	ERR12371821	PRJEB68199	Dataset 1, 2 and 3	This study
gas1821592	M1UK	Blood culture	2022	UK	ERR12371822	PRJEB68199	Dataset 1, 2 and 3	This study
gas1821593	M1UK	Blood culture	2022	UK	ERR12371823	PRJEB68199	Dataset 1, 2 and 3	This study
gas1821595	M1UK	Blood culture	2023	UK	ERR12371824	PRJEB68199	Dataset 1, 2 and 3	This study
gas1821596	M1UK	Blood culture	2023	UK	ERR12371825	PRJEB68199	Dataset 1, 2 and 3	This study
gas1821597	M1UK	Blood culture	2023	UK	ERR12371826	PRJEB68199	Dataset 1, 2 and 3	This study
gas1821599	M1UK	Blood culture	2023	UK	ERR12371827	PRJEB68199	Dataset 1, 2 and 3	This study
gas1821600	M1UK	Blood culture	2023	UK	ERR12371828	PRJEB68199	Dataset 1, 2 and 3	This study
gas1821601	M1UK	Pleural fluid	2023	UK	ERR12371829	PRJEB68199	Dataset 1, 2 and 3	This study
gas1821602	M1UK	Blood culture	2023	UK	ERR12371830	PRJEB68199	Dataset 1, 2 and 3	This study
gas1821603	M1UK	Tissue	2023	UK	ERR12371831	PRJEB68199	Dataset 1, 2 and 3	This study
gas1821604	M1UK	Blood culture	2023	UK	ERR12371832	PRJEB68199	Dataset 1, 2 and 3	This study
gas1821605	M1Global	Biopsy from lung	2023	UK	ERR12371833	PRJEB68199	Dataset 1 and 2	This study
gas1821606	M1UK	Blood culture	2022	UK	ERR12371834	PRJEB68199	Dataset 1, 2 and 3	This study
gas1821607	M1UK	Blood culture	2022	UK	ERR12371835	PRJEB68199	Dataset 1, 2 and 3	This study
gas1821609	M1UK	Pleural fluid	2023	UK	ERR12371836	PRJEB68199	Dataset 1, 2 and 3	This study
gas1821610	M1UK	Blood culture	2023	UK	ERR12371837	PRJEB68199	Dataset 1, 2 and 3	This study
gas1821773	M1UK	Blood culture	2023	UK	ERR12371838	PRJEB68199	Dataset 1, 2 and 3	This study
gas1821778	26 SNPs	Pus	2022	UK	ERR12371839	PRJEB68199	Dataset 1, 2 and 3	This study
gas1821779	M1UK	Blood culture	2022	UK	ERR12371840	PRJEB68199	Dataset 1, 2 and 3	This study
gas1821780	M1UK	Blood culture	2022	UK	ERR12371841	PRJEB68199	Dataset 1, 2 and 3	This study
gas1821782	M1UK	Blood culture	2022	UK	ERR12371842	PRJEB68199	Dataset 1, 2 and 3	This study
gas1821784	M1UK	Blood culture	2022	UK	ERR12371843	PRJEB68199	Dataset 1, 2 and 3	This study
gas1821785	M1UK	Pleural fluid	2022	UK	ERR12371844	PRJEB68199	Dataset 1, 2 and 3	This study
gas1821787	M1UK	Blood culture	2022	UK	ERR12371845	PRJEB68199	Dataset 1, 2 and 3	This study
gas1821788	M1UK	Blood culture	2022	UK	ERR12371846	PRJEB68199	Dataset 1, 2 and 3	This study
gas1821790	M1UK	Blood culture	2022	UK	ERR12371847	PRJEB68199	Dataset 1, 2 and 3	This study
gas1821791	M1UK	Blood culture	2022	UK	ERR12371848	PRJEB68199	Dataset 1, 2 and 3	This study
gas1821792	M1UK	Blood culture	2022	UK	ERR12371849	PRJEB68199	Dataset 1, 2 and 3	This study
gas1821793	M1UK	Blood culture	2022	UK	ERR12371850	PRJEB68199	Dataset 1, 2 and 3	This study
gas1821794	M1UK	Blood culture	2022	UK	ERR12371851	PRJEB68199	Dataset 1, 2 and 3	This study
gas1821795	M1UK	Blood culture	2023	UK	ERR12371852	PRJEB68199	Dataset 1, 2 and 3	This study
gas1821797	26 SNPs	Blood culture	2022	UK	ERR12371853	PRJEB68199	Dataset 1, 2 and 3	This study
gas1821798	M1UK	Blood culture	2022	UK	ERR12371854	PRJEB68199	Dataset 1, 2 and 3	This study
gas1821800	M1UK	Other	2022	UK	ERR12371855	PRJEB68199	Dataset 1, 2 and 3	This study
gas1821803	M1UK	Tissue	2022	UK	ERR12371856	PRJEB68199	Dataset 1, 2 and 3	This study
gas1821806	M1UK	Blood culture	2022	UK	ERR12371857	PRJEB68199	Dataset 1, 2 and 3	This study
gas1821809	M1UK	Blood culture	2022	UK	ERR12371858	PRJEB68199	Dataset 1, 2 and 3	This study
gas1821816	M1UK	Blood culture	2022	UK	ERR12371859	PRJEB68199	Dataset 1, 2 and 3	This study
gas1821819	M1UK	Blood culture	2022	UK	ERR12371860	PRJEB68199	Dataset 1, 2 and 3	This study
gas1821822	M1UK	Blood culture	2022	UK	ERR12371861	PRJEB68199	Dataset 1, 2 and 3	This study
gas1821823	M1UK	Fluid	2022	UK	ERR12371862	PRJEB68199	Dataset 1, 2 and 3	This study
gas1821825	M1UK	Blood culture	2022	UK	ERR12371863	PRJEB68199	Dataset 1, 2 and 3	This study
gas1821826	M1UK	Blood culture	2022	UK	ERR12371864	PRJEB68199	Dataset 1, 2 and 3	This study
gas1821827	M1UK	Blood culture	2022	UK	ERR12371865	PRJEB68199	Dataset 1, 2 and 3	This study
gas1821828	M1UK	Blood culture	2022	UK	ERR12371866	PRJEB68199	Dataset 1, 2 and 3	This study
gas1821829	M1UK	Blood culture	2022	UK	ERR12371867	PRJEB68199	Dataset 1, 2 and 3	This study
gas1821831	M1UK	Wound swab	2023	UK	ERR12371868	PRJEB68199	Dataset 1, 2 and 3	This study
gas1821832	M1UK	Swab	2022	UK	ERR12371869	PRJEB68199	Dataset 1, 2 and 3	This study
gas1821834	M1UK	Tissue	2022	UK	ERR12371870	PRJEB68199	Dataset 1, 2 and 3	This study
gas1821837	M1UK	Pus	2022	UK	ERR12371871	PRJEB68199	Dataset 1, 2 and 3	This study
gas1821840	M1UK	Blood culture	2022	UK	ERR12371872	PRJEB68199	Dataset 1, 2 and 3	This study
gas1821844	M1UK	Blood culture	2023	UK	ERR12371873	PRJEB68199	Dataset 1, 2 and 3	This study
gas1821845	M1UK	Blood culture	2022	UK	ERR12371874	PRJEB68199	Dataset 1, 2 and 3	This study
gas1821846	M1UK	Blood culture	2022	UK	ERR12371875	PRJEB68199	Dataset 1, 2 and 3	This study
gas1821848	M1UK	Blood culture	2022	UK	ERR12371876	PRJEB68199	Dataset 1, 2 and 3	This study
gas1821849	M1UK	Blood culture	2022	UK	ERR12371877	PRJEB68199	Dataset 1, 2 and 3	This study
gas1821850	M1Global_without_phage	Blood culture	2022	UK	ERR12371878	PRJEB68199	Dataset 1 and 2	This study
gas1821851	M1Global	Blood culture	2022	UK	ERR12371879	PRJEB68199	Dataset 1 and 2	This study
gas1821853	M1UK	Blood culture	2022	UK	ERR12371880	PRJEB68199	Dataset 1, 2 and 3	This study
gas1821855	M1UK	Blood culture	2022	UK	ERR12371881	PRJEB68199	Dataset 1, 2 and 3	This study
gas1821856	M1UK	Blood culture	2022	UK	ERR12371882	PRJEB68199	Dataset 1, 2 and 3	This study
gas1821858	M1UK	Blood culture	2022	UK	ERR12371883	PRJEB68199	Dataset 1, 2 and 3	This study
gas1821860	M1UK	Wound swab	2022	UK	ERR12371884	PRJEB68199	Dataset 1, 2 and 3	This study
gas1821861	M1UK	Blood culture	2022	UK	ERR12371885	PRJEB68199	Dataset 1, 2 and 3	This study
gas1822118	M1UK	Blood culture	2023	UK	ERR12371886	PRJEB68199	Dataset 1, 2 and 3	This study
gas1822133	M1UK	Blood culture	2023	UK	ERR12371887	PRJEB68199	Dataset 1, 2 and 3	This study
gas1822139	M1UK	Pleural fluid	2023	UK	ERR12371888	PRJEB68199	Dataset 1, 2 and 3	This study
gas1822141	M1UK	Blood culture	2023	UK	ERR12371889	PRJEB68199	Dataset 1, 2 and 3	This study
gas1822143	M1UK	Blood culture	2023	UK	ERR12371890	PRJEB68199	Dataset 1, 2 and 3	This study
gas1822145	M1UK	Blood culture	2023	UK	ERR12371891	PRJEB68199	Dataset 1, 2 and 3	This study
gas1822150	M1UK	Blood culture	2023	UK	ERR12371892	PRJEB68199	Dataset 1, 2 and 3	This study
gas1822152	M1UK	Blood culture	2023	UK	ERR12371893	PRJEB68199	Dataset 1, 2 and 3	This study
gas1822154	M1UK	Pleural fluid	2022	UK	ERR12371894	PRJEB68199	Dataset 1, 2 and 3	This study
gas1822156	M1UK	Pleural fluid	2022	UK	ERR12371895	PRJEB68199	Dataset 1, 2 and 3	This study
gas1822165	M1UK	Blood culture	2022	UK	ERR12371896	PRJEB68199	Dataset 1, 2 and 3	This study
gas1822168	M1UK	Blood culture	2023	UK	ERR12371897	PRJEB68199	Dataset 1, 2 and 3	This study
gas1822173	M1UK	Blood culture	2023	UK	ERR12371898	PRJEB68199	Dataset 1, 2 and 3	This study
gas1822176	M1UK	Blood culture	2022	UK	ERR12371899	PRJEB68199	Dataset 1, 2 and 3	This study
gas1822178	M1UK	Blood culture	2022	UK	ERR12371900	PRJEB68199	Dataset 1, 2 and 3	This study
gas1822182	M1UK	Blood culture	2023	UK	ERR12371901	PRJEB68199	Dataset 1, 2 and 3	This study
gas1822184	M1UK	Blood culture	2022	UK	ERR12371902	PRJEB68199	Dataset 1, 2 and 3	This study
gas1822194	M1UK	Blood culture	2023	UK	ERR12371903	PRJEB68199	Dataset 1, 2 and 3	This study
gas1822197	M1Global	Blood culture	2023	UK	ERR12371904	PRJEB68199	Dataset 1 and 2	This study
gas1822200	M1UK	Blood culture	2022	UK	ERR12371905	PRJEB68199	Dataset 1, 2 and 3	This study
gas1822201	M1UK	Blood culture	2023	UK	ERR12371906	PRJEB68199	Dataset 1, 2 and 3	This study
gas1822212	M1UK	Blood culture	2023	UK	ERR12371907	PRJEB68199	Dataset 1, 2 and 3	This study
gas1822583	M1UK	Bronchial alveolar lavage	2022	UK	ERR12371908	PRJEB68199	Dataset 1, 2 and 3	This study
gas1822586	26 SNPs	Blood culture	2022	UK	ERR12371909	PRJEB68199	Dataset 1, 2 and 3	This study
gas1822589	M1UK	Blood culture	2022	UK	ERR12371910	PRJEB68199	Dataset 1, 2 and 3	This study
gas1822591	M1UK	Blood culture	2022	UK	ERR12371911	PRJEB68199	Dataset 1, 2 and 3	This study
gas1822595	M1UK	Biopsy from lung	2022	UK	ERR12371912	PRJEB68199	Dataset 1, 2 and 3	This study
gas1822596	26 SNPs	Pleural fluid	2022	UK	ERR12371913	PRJEB68199	Dataset 1, 2 and 3	This study
gas1822599	M1UK	Blood culture	2022	UK	ERR12371914	PRJEB68199	Dataset 1, 2 and 3	This study
gas1822600	M1UK	Blood culture	2022	UK	ERR12371915	PRJEB68199	Dataset 1, 2 and 3	This study
gas1822603	M1UK	Tissue	2022	UK	ERR12371916	PRJEB68199	Dataset 1, 2 and 3	This study
gas1822604	M1UK	Wound swab	2022	UK	ERR12371917	PRJEB68199	Dataset 1, 2 and 3	This study
gas1822608	M1UK	Throat swab	2022	UK	ERR12371918	PRJEB68199	Dataset 1, 2 and 3	This study
gas1822612	M1UK	Tissue	2022	UK	ERR12371919	PRJEB68199	Dataset 1, 2 and 3	This study
gas1822615	M1UK	Blood culture	2022	UK	ERR12371920	PRJEB68199	Dataset 1, 2 and 3	This study
gas1822616	M1UK	Blood culture	2022	UK	ERR12371921	PRJEB68199	Dataset 1, 2 and 3	This study
gas1822618	M1UK	Blood culture	2022	UK	ERR12371922	PRJEB68199	Dataset 1, 2 and 3	This study
gas1822619	M1UK	Blood culture	2022	UK	ERR12371923	PRJEB68199	Dataset 1, 2 and 3	This study
gas1822620	M1UK	Blood culture	2022	UK	ERR12371924	PRJEB68199	Dataset 1, 2 and 3	This study
gas1822621	M1UK	Blood culture	2022	UK	ERR12371925	PRJEB68199	Dataset 1, 2 and 3	This study
gas1822625	M1UK	Blood culture	2022	UK	ERR12371926	PRJEB68199	Dataset 1, 2 and 3	This study
gas1822627	M1UK	Blood culture	2022	UK	ERR12371927	PRJEB68199	Dataset 1, 2 and 3	This study
gas1822628	M1UK	Blood culture	2023	UK	ERR12371928	PRJEB68199	Dataset 1, 2 and 3	This study
gas1822654	M1UK	Blood culture	2022	UK	ERR12371929	PRJEB68199	Dataset 1, 2 and 3	This study
gas1822658	M1UK	Wound swab	2022	UK	ERR12371930	PRJEB68199	Dataset 1, 2 and 3	This study
gas1822670	M1Global	Blood culture	2022	UK	ERR12371931	PRJEB68199	Dataset 1 and 2	This study
gas1825916	M1Global	Blood culture	2023	UK	ERR12371932	PRJEB68199	Dataset 1 and 2	This study
gas1825917	M1UK	Blood culture	2023	UK	ERR12371933	PRJEB68199	Dataset 1, 2 and 3	This study
gas1825918	M1UK	Pus	2023	UK	ERR12371934	PRJEB68199	Dataset 1, 2 and 3	This study
gas1825920	M1UK	Blood culture	2023	UK	ERR12371935	PRJEB68199	Dataset 1, 2 and 3	This study
gas1825921	M1UK	Ear swab	2023	UK	ERR12371936	PRJEB68199	Dataset 1, 2 and 3	This study
gas1825923	M1UK	Blood culture	2023	UK	ERR12371937	PRJEB68199	Dataset 1, 2 and 3	This study
gas1825924	M1UK	Tissue	2023	UK	ERR12371938	PRJEB68199	Dataset 1, 2 and 3	This study
gas1825925	M1UK	Blood culture	2023	UK	ERR12371939	PRJEB68199	Dataset 1, 2 and 3	This study
gas1825926	M1UK	Blood culture	2023	UK	ERR12371940	PRJEB68199	Dataset 1, 2 and 3	This study
gas1825928	M1UK	Blood culture	2022	UK	ERR12371941	PRJEB68199	Dataset 1, 2 and 3	This study
gas1825930	M1UK	Blood culture	2023	UK	ERR12371942	PRJEB68199	Dataset 1, 2 and 3	This study
gas1825931	M1UK	Blood culture	2023	UK	ERR12371943	PRJEB68199	Dataset 1, 2 and 3	This study
gas1825932	M1UK	Throat swab	2022	UK	ERR12371944	PRJEB68199	Dataset 1, 2 and 3	This study
gas1825933	M1UK	Ear swab	2022	UK	ERR12371945	PRJEB68199	Dataset 1, 2 and 3	This study
gas1825934	M1UK	Pus	2023	UK	ERR12371946	PRJEB68199	Dataset 1, 2 and 3	This study
gas1825937	M1UK	Blood culture	2023	UK	ERR12371947	PRJEB68199	Dataset 1, 2 and 3	This study
gas1825938	M1UK	Abscess	2023	UK	ERR12371948	PRJEB68199	Dataset 1, 2 and 3	This study
gas1825939	M1UK	Blood culture	2023	UK	ERR12371949	PRJEB68199	Dataset 1, 2 and 3	This study
gas1825940	M1UK	Blood culture	2023	UK	ERR12371950	PRJEB68199	Dataset 1, 2 and 3	This study
gas1825941	M1UK	Other	2023	UK	ERR12371951	PRJEB68199	Dataset 1, 2 and 3	This study
gas1825942	26 SNPs	Blood culture	2023	UK	ERR12371952	PRJEB68199	Dataset 1, 2 and 3	This study
gas1825943	M1UK	Blood culture	2023	UK	ERR12371953	PRJEB68199	Dataset 1, 2 and 3	This study
gas1825944	M1UK	Blood culture	2023	UK	ERR12371954	PRJEB68199	Dataset 1, 2 and 3	This study
gas1825945	M1UK	Tissue	2023	UK	ERR12371955	PRJEB68199	Dataset 1, 2 and 3	This study
gas1825946	26 SNPs	Nose swab	2022	UK	ERR12371956	PRJEB68199	Dataset 1, 2 and 3	This study
gas1825947	M1UK	Blood culture	2023	UK	ERR12371957	PRJEB68199	Dataset 1, 2 and 3	This study
gas1825948	M1UK	Blood culture	2023	UK	ERR12371958	PRJEB68199	Dataset 1, 2 and 3	This study
gas1825949	M1UK	Blood culture	2023	UK	ERR12371959	PRJEB68199	Dataset 1, 2 and 3	This study
gas1825950	M1UK	Blood culture	2023	UK	ERR12371960	PRJEB68199	Dataset 1, 2 and 3	This study
gas1825951	M1UK	Blood culture	2023	UK	ERR12371961	PRJEB68199	Dataset 1, 2 and 3	This study
gas1825952	M1UK	Blood culture	2022	UK	ERR12371962	PRJEB68199	Dataset 1, 2 and 3	This study
gas1825954	M1UK	Blood culture	2023	UK	ERR12371963	PRJEB68199	Dataset 1, 2 and 3	This study
gas1825955	M1UK	Blood culture	2023	UK	ERR12371964	PRJEB68199	Dataset 1, 2 and 3	This study
gas1825956	M1UK	Blood culture	2023	UK	ERR12371965	PRJEB68199	Dataset 1, 2 and 3	This study
gas1825958	M1Global	Pleural fluid	2022	UK	ERR12371966	PRJEB68199	Dataset 1 and 2	This study
gas1825959	M1UK	Bronchial washings	2022	UK	ERR12371967	PRJEB68199	Dataset 1, 2 and 3	This study
gas1825961	M1UK	Blood culture	2023	UK	ERR12371968	PRJEB68199	Dataset 1, 2 and 3	This study
gas1825962	26 SNPs	Blood culture	2023	UK	ERR12371969	PRJEB68199	Dataset 1, 2 and 3	This study
gas1825966	M1UK	Blood culture	2023	UK	ERR12371970	PRJEB68199	Dataset 1, 2 and 3	This study
gas1825968	M1UK	Blood culture	2022	UK	ERR12371971	PRJEB68199	Dataset 1, 2 and 3	This study
gas1825969	M1UK	Blood culture	2023	UK	ERR12371972	PRJEB68199	Dataset 1, 2 and 3	This study
gas1825970	M1UK	Blood culture	2023	UK	ERR12371973	PRJEB68199	Dataset 1, 2 and 3	This study
gas1825973	M1UK	Blood culture	2023	UK	ERR12371974	PRJEB68199	Dataset 1, 2 and 3	This study
gas1825974	M1UK	Blood culture	2023	UK	ERR12371975	PRJEB68199	Dataset 1, 2 and 3	This study
gas1825976	M1UK	Information not provided	2023	UK	ERR12371976	PRJEB68199	Dataset 1, 2 and 3	This study
gas1825977	M1UK	Blood culture	2023	UK	ERR12371977	PRJEB68199	Dataset 1, 2 and 3	This study
gas1825979	M1UK	Blood culture	2023	UK	ERR12371978	PRJEB68199	Dataset 1, 2 and 3	This study
gas1825980	M1UK	Blood culture	2023	UK	ERR12371979	PRJEB68199	Dataset 1, 2 and 3	This study
gas1825981	M1UK	Blood culture	2023	UK	ERR12371980	PRJEB68199	Dataset 1, 2 and 3	This study
gas1825982	M1UK	Blood culture	2023	UK	ERR12371981	PRJEB68199	Dataset 1, 2 and 3	This study
gas1825983	M1UK	Blood culture	2023	UK	ERR12371982	PRJEB68199	Dataset 1, 2 and 3	This study
gas1825984	M1UK	Blood culture	2023	UK	ERR12371983	PRJEB68199	Dataset 1, 2 and 3	This study
gas1825987	M1UK	Blood culture	2023	UK	ERR12371984	PRJEB68199	Dataset 1, 2 and 3	This study
gas1825988	M1UK	Blood culture	2023	UK	ERR12371985	PRJEB68199	Dataset 1, 2 and 3	This study
gas1825992	M1UK	Blood culture	2023	UK	ERR12371986	PRJEB68199	Dataset 1, 2 and 3	This study
gas1825993	M1UK	Blood culture	2023	UK	ERR12371987	PRJEB68199	Dataset 1, 2 and 3	This study
gas1825995	M1UK	Blood culture	2023	UK	ERR12371988	PRJEB68199	Dataset 1, 2 and 3	This study
gas1825996	M1Global	Blood culture	2023	UK	ERR12371989	PRJEB68199	Dataset 1 and 2	This study
gas1825997	M1UK	Pleural fluid	2023	UK	ERR12371990	PRJEB68199	Dataset 1, 2 and 3	This study
gas1825999	M1UK	Blood culture	2023	UK	ERR12371991	PRJEB68199	Dataset 1, 2 and 3	This study
gas1826000	M1UK	Joint	2023	UK	ERR12371992	PRJEB68199	Dataset 1, 2 and 3	This study
gas1826002	M1UK	Blood culture	2023	UK	ERR12371993	PRJEB68199	Dataset 1, 2 and 3	This study
gas1831444	M1UK	Blood culture	2023	UK	ERR12371994	PRJEB68199	Dataset 1, 2 and 3	This study
gas1831446	M1UK	Blood culture	2023	UK	ERR12371995	PRJEB68199	Dataset 1, 2 and 3	This study
gas1831447	M1UK	Nose swab	2023	UK	ERR12371996	PRJEB68199	Dataset 1, 2 and 3	This study
gas1831448	M1UK	Blood culture	2023	UK	ERR12371997	PRJEB68199	Dataset 1, 2 and 3	This study
gas1831450	M1UK	Blood culture	2023	UK	ERR12371998	PRJEB68199	Dataset 1, 2 and 3	This study
gas1831451	M1UK	Blood culture	2023	UK	ERR12371999	PRJEB68199	Dataset 1, 2 and 3	This study
gas1831452	M1UK	Blood culture	2023	UK	ERR12372000	PRJEB68199	Dataset 1, 2 and 3	This study
gas1831453	M1UK	Blood culture	2023	UK	ERR12372001	PRJEB68199	Dataset 1, 2 and 3	This study
gas1831454	M1UK	Blood culture	2023	UK	ERR12372002	PRJEB68199	Dataset 1, 2 and 3	This study
gas1831455	M1UK	Blood culture	2023	UK	ERR12372003	PRJEB68199	Dataset 1, 2 and 3	This study
gas1831459	M1UK	Blood culture	2023	UK	ERR12372004	PRJEB68199	Dataset 1, 2 and 3	This study
gas1831460	M1UK	Blood culture	2023	UK	ERR12372005	PRJEB68199	Dataset 1, 2 and 3	This study
gas1831463	M1UK	Blood culture	2023	UK	ERR12372006	PRJEB68199	Dataset 1, 2 and 3	This study
gas1831466	M1UK	Blood culture	2023	UK	ERR12372007	PRJEB68199	Dataset 1, 2 and 3	This study
gas1831467	M1UK	Blood culture	2023	UK	ERR12372008	PRJEB68199	Dataset 1, 2 and 3	This study
gas1831468	M1UK	Blood culture	2023	UK	ERR12372009	PRJEB68199	Dataset 1, 2 and 3	This study
gas1831471	M1UK	Blood culture	2023	UK	ERR12372010	PRJEB68199	Dataset 1, 2 and 3	This study
gas1831472	M1UK	Pleural fluid	2023	UK	ERR12372011	PRJEB68199	Dataset 1, 2 and 3	This study
gas1831473	M1UK	Blood culture	2023	UK	ERR12372012	PRJEB68199	Dataset 1, 2 and 3	This study
gas1831474	26 SNPs	Skin swab	2023	UK	ERR12372013	PRJEB68199	Dataset 1, 2 and 3	This study
gas1831478	M1UK	Blood culture	2023	UK	ERR12372014	PRJEB68199	Dataset 1, 2 and 3	This study
gas1831479	M1UK	Blood culture	2023	UK	ERR12372015	PRJEB68199	Dataset 1, 2 and 3	This study
gas1831480	M1Global	Throat swab	2023	UK	ERR12372016	PRJEB68199	Dataset 1 and 2	This study
gas1831481	M1UK	Blood culture	2023	UK	ERR12372017	PRJEB68199	Dataset 1, 2 and 3	This study
gas1831482	M1UK	Blood culture	2023	UK	ERR12372018	PRJEB68199	Dataset 1, 2 and 3	This study
gas1831483	M1UK	Blood culture	2023	UK	ERR12372019	PRJEB68199	Dataset 1, 2 and 3	This study
gas1831484	M1UK	Blood culture	2023	UK	ERR12372020	PRJEB68199	Dataset 1, 2 and 3	This study
gas1831485	M1UK	Joint	2023	UK	ERR12372021	PRJEB68199	Dataset 1, 2 and 3	This study
gas1831490	M1UK	Blood culture	2023	UK	ERR12372022	PRJEB68199	Dataset 1, 2 and 3	This study
gas1831492	M1UK	Blood culture	2023	UK	ERR12372023	PRJEB68199	Dataset 1, 2 and 3	This study
gas1831493	M1UK	Wound swab	2023	UK	ERR12372024	PRJEB68199	Dataset 1, 2 and 3	This study
gas1831494	M1UK	Blood culture	2023	UK	ERR12372025	PRJEB68199	Dataset 1, 2 and 3	This study
gas1831495	M1UK	Wound swab	2023	UK	ERR12372026	PRJEB68199	Dataset 1, 2 and 3	This study
gas1831496	M1UK	Blood culture	2023	UK	ERR12372027	PRJEB68199	Dataset 1, 2 and 3	This study
gas1831498	M1UK	Blood culture	2023	UK	ERR12372028	PRJEB68199	Dataset 1, 2 and 3	This study
gas1831500	M1UK	Skin swab	2022	UK	ERR12372029	PRJEB68199	Dataset 1, 2 and 3	This study
gas1831502	M1UK	Blood culture	2023	UK	ERR12372030	PRJEB68199	Dataset 1, 2 and 3	This study
gas1834538	M1UK	Blood culture	2023	UK	ERR12372031	PRJEB68199	Dataset 1, 2 and 3	This study
gas1834539	M1UK	Swab	2023	UK	ERR12372032	PRJEB68199	Dataset 1, 2 and 3	This study
gas1834541	M1UK	Sputum	2023	UK	ERR12372033	PRJEB68199	Dataset 1, 2 and 3	This study
gas1834543	M1UK	Blood culture	2023	UK	ERR12372034	PRJEB68199	Dataset 1, 2 and 3	This study
gas1834544	M1UK	Wound swab	2023	UK	ERR12372035	PRJEB68199	Dataset 1, 2 and 3	This study
gas1834549	M1UK	Blood culture	2023	UK	ERR12372036	PRJEB68199	Dataset 1, 2 and 3	This study
gas1834553	M1UK	Information not provided	2023	UK	ERR12372037	PRJEB68199	Dataset 1, 2 and 3	This study
gas1834555	M1UK	CSF	2023	UK	ERR12372038	PRJEB68199	Dataset 1, 2 and 3	This study
gas1834557	M1UK	Blood culture	2023	UK	ERR12372039	PRJEB68199	Dataset 1, 2 and 3	This study
gas1834558	M1UK	Wound swab	2023	UK	ERR12372040	PRJEB68199	Dataset 1, 2 and 3	This study
gas1834559	M1UK	Blood culture	2023	UK	ERR12372041	PRJEB68199	Dataset 1, 2 and 3	This study
gas1834563	M1UK	Tissue	2023	UK	ERR12372042	PRJEB68199	Dataset 1, 2 and 3	This study
gas1834564	M1UK	Blood culture	2023	UK	ERR12372043	PRJEB68199	Dataset 1, 2 and 3	This study
gas1834565	M1UK	Tissue	2023	UK	ERR12372044	PRJEB68199	Dataset 1, 2 and 3	This study
gas1834568	M1UK	Blood culture	2023	UK	ERR12372045	PRJEB68199	Dataset 1, 2 and 3	This study
gas1834572	M1UK	Blood culture	2023	UK	ERR12372046	PRJEB68199	Dataset 1, 2 and 3	This study
gas1834575	M1UK	Blood culture	2023	UK	ERR12372047	PRJEB68199	Dataset 1, 2 and 3	This study
gas1834576	26 SNPs	Blood culture	2023	UK	ERR12372048	PRJEB68199	Dataset 1, 2 and 3	This study
gas1834577	M1UK	Blood culture	2023	UK	ERR12372049	PRJEB68199	Dataset 1, 2 and 3	This study
gas1834578	M1UK	Blood culture	2023	UK	ERR12372050	PRJEB68199	Dataset 1, 2 and 3	This study
gas1834582	M1UK	Blood culture	2023	UK	ERR12372051	PRJEB68199	Dataset 1, 2 and 3	This study
gas1834585	26 SNPs	Blood culture	2023	UK	ERR12372052	PRJEB68199	Dataset 1, 2 and 3	This study
gas1834586	M1UK	Blood culture	2023	UK	ERR12372053	PRJEB68199	Dataset 1, 2 and 3	This study
gas1834588	26 SNPs	Pleural fluid	2023	UK	ERR12372054	PRJEB68199	Dataset 1, 2 and 3	This study
gas1834589	M1UK	Blood culture	2023	UK	ERR12372055	PRJEB68199	Dataset 1, 2 and 3	This study
gas1834591	M1UK	Tissue	2023	UK	ERR12372056	PRJEB68199	Dataset 1, 2 and 3	This study
gas1834596	M1UK	Blood culture	2023	UK	ERR12372057	PRJEB68199	Dataset 1, 2 and 3	This study
gas1834599	M1UK	Blood culture	2023	UK	ERR12372058	PRJEB68199	Dataset 1, 2 and 3	This study
gas1834600	M1UK	Blood culture	2023	UK	ERR12372059	PRJEB68199	Dataset 1, 2 and 3	This study
gas1834601	M1UK	Blood culture	2023	UK	ERR12372060	PRJEB68199	Dataset 1, 2 and 3	This study
gas1834605	M1UK	Blood culture	2023	UK	ERR12372061	PRJEB68199	Dataset 1, 2 and 3	This study
gas1834608	M1UK	Blood culture	2023	UK	ERR12372062	PRJEB68199	Dataset 1, 2 and 3	This study
gas1834614	M1UK	Blood culture	2023	UK	ERR12372063	PRJEB68199	Dataset 1, 2 and 3	This study
gas1834615	M1UK	Blood culture	2023	UK	ERR12372064	PRJEB68199	Dataset 1, 2 and 3	This study
gas1834617	26 SNPs	Blood culture	2023	UK	ERR12372065	PRJEB68199	Dataset 1, 2 and 3	This study
gas1834618	M1UK	Tissue	2023	UK	ERR12372066	PRJEB68199	Dataset 1, 2 and 3	This study
gas1834619	M1UK	Pleural fluid	2023	UK	ERR12372067	PRJEB68199	Dataset 1, 2 and 3	This study
gas1834620	M1UK	Blood culture	2023	UK	ERR12372068	PRJEB68199	Dataset 1, 2 and 3	This study
gas1834621	M1UK	Pus	2023	UK	ERR12372069	PRJEB68199	Dataset 1, 2 and 3	This study
gas1834622	M1UK	Blood culture	2023	UK	ERR12372070	PRJEB68199	Dataset 1, 2 and 3	This study
gas1834623	M1UK	Abscess	2023	UK	ERR12372071	PRJEB68199	Dataset 1, 2 and 3	This study
gas1834624	M1UK	Tissue	2023	UK	ERR12372072	PRJEB68199	Dataset 1, 2 and 3	This study
gas1834625	M1UK	Blood culture	2023	UK	ERR12372073	PRJEB68199	Dataset 1, 2 and 3	This study
gas1834627	M1UK	Blood culture	2023	UK	ERR12372074	PRJEB68199	Dataset 1, 2 and 3	This study
gas1834630	M1UK	Throat swab	2023	UK	ERR12372075	PRJEB68199	Dataset 1, 2 and 3	This study
gas1836777	M1UK	Pleural fluid	2023	UK	ERR12372076	PRJEB68199	Dataset 1, 2 and 3	This study
gas1836779	M1UK	Blood culture	2023	UK	ERR12372077	PRJEB68199	Dataset 1, 2 and 3	This study
gas1836780	M1UK	Blood culture	2023	UK	ERR12372078	PRJEB68199	Dataset 1, 2 and 3	This study
gas1836782	26 SNPs	Blood culture	2023	UK	ERR12372079	PRJEB68199	Dataset 1, 2 and 3	This study
gas1836783	M1UK	Blood culture	2023	UK	ERR12372080	PRJEB68199	Dataset 1, 2 and 3	This study
gas1836789	M1UK	Blood culture	2023	UK	ERR12372081	PRJEB68199	Dataset 1, 2 and 3	This study
gas1836791	M1UK	Blood culture	2023	UK	ERR12372082	PRJEB68199	Dataset 1, 2 and 3	This study
gas1836793	M1UK	Swab	2023	UK	ERR12372083	PRJEB68199	Dataset 1, 2 and 3	This study
gas1836799	M1UK	Tissue	2023	UK	ERR12372084	PRJEB68199	Dataset 1, 2 and 3	This study
gas1836801	M1UK	Blood culture	2023	UK	ERR12372085	PRJEB68199	Dataset 1, 2 and 3	This study
gas1836803	M1UK	Blood culture	2023	UK	ERR12372086	PRJEB68199	Dataset 1, 2 and 3	This study
gas1836807	M1UK	Eye swab	2023	UK	ERR12372087	PRJEB68199	Dataset 1, 2 and 3	This study
gas1836811	M1UK	Pleural fluid	2023	UK	ERR12372088	PRJEB68199	Dataset 1, 2 and 3	This study
gas1836814	26 SNPs	Blood culture	2023	UK	ERR12372089	PRJEB68199	Dataset 1, 2 and 3	This study
gas1836816	M1UK	Blood culture	2023	UK	ERR12372090	PRJEB68199	Dataset 1, 2 and 3	This study
gas1836817	M1UK	Blood culture	2023	UK	ERR12372091	PRJEB68199	Dataset 1, 2 and 3	This study
gas1836818	M1UK	Blood culture	2023	UK	ERR12372092	PRJEB68199	Dataset 1, 2 and 3	This study
gas1836820	M1UK	Fluid	2023	UK	ERR12372093	PRJEB68199	Dataset 1, 2 and 3	This study
gas1836824	M1UK	Blood culture	2023	UK	ERR12372094	PRJEB68199	Dataset 1, 2 and 3	This study
gas1836827	M1UK	Blood culture	2023	UK	ERR12372095	PRJEB68199	Dataset 1, 2 and 3	This study
gas1836830	M1UK	Blood culture	2023	UK	ERR12372096	PRJEB68199	Dataset 1, 2 and 3	This study
gas1836832	M1UK	Blood culture	2023	UK	ERR12372097	PRJEB68199	Dataset 1, 2 and 3	This study
gas1836833	M1UK	Blood culture	2023	UK	ERR12372098	PRJEB68199	Dataset 1, 2 and 3	This study
gas1836835	M1UK	Tissue	2023	UK	ERR12372099	PRJEB68199	Dataset 1, 2 and 3	This study
gas1836836	M1UK	Blood culture	2023	UK	ERR12372100	PRJEB68199	Dataset 1, 2 and 3	This study
gas1836837	M1UK	Blood culture	2023	UK	ERR12372101	PRJEB68199	Dataset 1, 2 and 3	This study
gas1836842	M1UK	Pleural fluid	2023	UK	ERR12372102	PRJEB68199	Dataset 1, 2 and 3	This study
gas1836845	M1UK	Blood culture	2022	UK	ERR12372103	PRJEB68199	Dataset 1, 2 and 3	This study
gas1836846	M1UK	Blood culture	2023	UK	ERR12372104	PRJEB68199	Dataset 1, 2 and 3	This study
SP22_0155	M1UK	sore throat culture swabs	2022	UK	ERR12373782	PRJEB71329	Dataset 2	This study
SP22_0301	M1UK	sore throat culture swabs	2022	UK	ERR12373783	PRJEB71329	Dataset 2	This study
SP22_0313	M1UK	sore throat culture swabs	2022	UK	ERR12373784	PRJEB71329	Dataset 2	This study
SP22_0429	M1GLobal	sore throat culture swabs	2022	UK	ERR12373785	PRJEB71329	Dataset 2	This study
SP22_0430	M1GLobal	sore throat culture swabs	2022	UK	ERR12373786	PRJEB71329	Dataset 2	This study
SP22_0526	M1UK	sore throat culture swabs	2022	UK	ERR12373787	PRJEB71329	Dataset 2	This study
SP22_0610	M1UK	sore throat culture swabs	2022	UK	ERR12373788	PRJEB71329	Dataset 2	This study
SP22_0628	M1UK	sore throat culture swabs	2022	UK	ERR12373789	PRJEB71329	Dataset 2	This study
SP22_0640	M1UK	sore throat culture swabs	2022	UK	ERR12373790	PRJEB71329	Dataset 2	This study
SP22_0700	M1UK	sore throat culture swabs	2022	UK	ERR12373791	PRJEB71329	Dataset 2	This study
SP22_0706	M1UK	sore throat culture swabs	2022	UK	ERR12373792	PRJEB71329	Dataset 2	This study
SP22_0783	M1UK	sore throat culture swabs	2022	UK	ERR12373793	PRJEB71329	Dataset 2	This study
SP22_0835	M1UK	sore throat culture swabs	2022	UK	ERR12373794	PRJEB71329	Dataset 2	This study
SP22_0851	M1UK	sore throat culture swabs	2022	UK	ERR12373795	PRJEB71329	Dataset 2	This study
SP22_0860	M1UK	sore throat culture swabs	2022	UK	ERR12373796	PRJEB71329	Dataset 2	This study
SP22_0864	M1UK	sore throat culture swabs	2022	UK	ERR12373797	PRJEB71329	Dataset 2	This study
SP22_0878	26SNPs	sore throat culture swabs	2022	UK	ERR12373798	PRJEB71329	Dataset 2	This study
SP22_0889	M1GLobal	sore throat culture swabs	2022	UK	ERR12373799	PRJEB71329	Dataset 2	This study
SP22_0890	M1UK	sore throat culture swabs	2022	UK	ERR12373800	PRJEB71329	Dataset 2	This study
SP22_0979	M1UK	sore throat culture swabs	2022	UK	ERR12373801	PRJEB71329	Dataset 2	This study
SP22_1011	M1UK	sore throat culture swabs	2022	UK	ERR12373802	PRJEB71329	Dataset 2	This study
SP22_1019	M1UK	sore throat culture swabs	2022	UK	ERR12373803	PRJEB71329	Dataset 2	This study
SP22_1020	M1UK	sore throat culture swabs	2022	UK	ERR12373804	PRJEB71329	Dataset 2	This study
SP22_1054	M1GLobal	sore throat culture swabs	2022	UK	ERR12373805	PRJEB71329	Dataset 2	This study
SP22_1062	M1GLobal	sore throat culture swabs	2022	UK	ERR12373806	PRJEB71329	Dataset 2	This study
SP22_1067	M1GLobal	sore throat culture swabs	2022	UK	ERR12373807	PRJEB71329	Dataset 2	This study
SP22_1075	M1GLobal	sore throat culture swabs	2022	UK	ERR12373808	PRJEB71329	Dataset 2	This study
SP22_1081	M1GLobal	sore throat culture swabs	2022	UK	ERR12373809	PRJEB71329	Dataset 2	This study
SP22_1082	M1UK	sore throat culture swabs	2022	UK	ERR12373810	PRJEB71329	Dataset 2	This study
SP22_1097	M1UK	sore throat culture swabs	2022	UK	ERR12373811	PRJEB71329	Dataset 2	This study
SP22_1107	M1GLobal	sore throat culture swabs	2022	UK	ERR12373812	PRJEB71329	Dataset 2	This study
SP22_1124	M1UK	sore throat culture swabs	2022	UK	ERR12373813	PRJEB71329	Dataset 2	This study
SP22_1126	M1UK	sore throat culture swabs	2022	UK	ERR12373814	PRJEB71329	Dataset 2	This study
SP22_1140	M1UK	sore throat culture swabs	2022	UK	ERR12373815	PRJEB71329	Dataset 2	This study
SP22_1160	M1UK	sore throat culture swabs	2022	UK	ERR12373816	PRJEB71329	Dataset 2	This study
SP22_1306	M1UK	sore throat culture swabs	2022	UK	ERR12373817	PRJEB71329	Dataset 2	This study
SP22_1320	M1UK	sore throat culture swabs	2022	UK	ERR12373818	PRJEB71329	Dataset 2	This study
SP22_1336	M1UK	sore throat culture swabs	2022	UK	ERR12373819	PRJEB71329	Dataset 2	This study
SP22_1339	M1UK	sore throat culture swabs	2022	UK	ERR12373820	PRJEB71329	Dataset 2	This study
SP22_1351	M1UK	sore throat culture swabs	2022	UK	ERR12373821	PRJEB71329	Dataset 2	This study
SP22_1357	M1UK	sore throat culture swabs	2022	UK	ERR12373822	PRJEB71329	Dataset 2	This study
SP22_1361	M1UK	sore throat culture swabs	2022	UK	ERR12373823	PRJEB71329	Dataset 2	This study
SP22_1364	M1UK	sore throat culture swabs	2022	UK	ERR12373824	PRJEB71329	Dataset 2	This study
SP22_1369	M1UK	sore throat culture swabs	2022	UK	ERR12373825	PRJEB71329	Dataset 2	This study
SP22_1377	M1UK	sore throat culture swabs	2022	UK	ERR12373826	PRJEB71329	Dataset 2	This study
SP22_1380	M1UK	sore throat culture swabs	2022	UK	ERR12373827	PRJEB71329	Dataset 2	This study
SP22_1383	M1UK	sore throat culture swabs	2022	UK	ERR12373828	PRJEB71329	Dataset 2	This study
SP22_1388	M1UK	sore throat culture swabs	2022	UK	ERR12373829	PRJEB71329	Dataset 2	This study
SP22_1390	M1UK	sore throat culture swabs	2022	UK	ERR12373830	PRJEB71329	Dataset 2	This study
SP22_1407	M1UK	sore throat culture swabs	2022	UK	ERR12373831	PRJEB71329	Dataset 2	This study
SP22_1413	M1UK	sore throat culture swabs	2022	UK	ERR12373832	PRJEB71329	Dataset 2	This study
SP22_1430	M1UK	sore throat culture swabs	2022	UK	ERR12373833	PRJEB71329	Dataset 2	This study
SP22_1435	M1GLobal	sore throat culture swabs	2022	UK	ERR12373834	PRJEB71329	Dataset 2	This study
SP22_1447	M1UK	sore throat culture swabs	2022	UK	ERR12373835	PRJEB71329	Dataset 2	This study
SP22_1450	M1GLobal	sore throat culture swabs	2022	UK	ERR12373836	PRJEB71329	Dataset 2	This study
SP22_1451	M1UK	sore throat culture swabs	2022	UK	ERR12373837	PRJEB71329	Dataset 2	This study
SP22_1452	M1UK	sore throat culture swabs	2022	UK	ERR12373838	PRJEB71329	Dataset 2	This study
SP22_1456	M1UK	sore throat culture swabs	2022	UK	ERR12373839	PRJEB71329	Dataset 2	This study
SP22_1459	M1UK	sore throat culture swabs	2022	UK	ERR12373840	PRJEB71329	Dataset 2	This study
SP22_1462	M1UK	sore throat culture swabs	2022	UK	ERR12373841	PRJEB71329	Dataset 2	This study
SP22_1477	M1UK	sore throat culture swabs	2022	UK	ERR12373842	PRJEB71329	Dataset 2	This study
SP22_1480	M1UK	sore throat culture swabs	2022	UK	ERR12373843	PRJEB71329	Dataset 2	This study
SP22_1482	M1UK	sore throat culture swabs	2022	UK	ERR12373844	PRJEB71329	Dataset 2	This study
SP22_1484	M1GLobal	sore throat culture swabs	2022	UK	ERR12373845	PRJEB71329	Dataset 2	This study
SP22_1501	M1UK	sore throat culture swabs	2022	UK	ERR12373846	PRJEB71329	Dataset 2	This study
SP22_1507	M1UK	sore throat culture swabs	2022	UK	ERR12373847	PRJEB71329	Dataset 2	This study
SP22_1515	M1UK	sore throat culture swabs	2022	UK	ERR12373848	PRJEB71329	Dataset 2	This study
SP22_1517	M1UK	sore throat culture swabs	2022	UK	ERR12373849	PRJEB71329	Dataset 2	This study
SP22_154	M1UK	sore throat culture swabs	2022	UK	ERR12373850	PRJEB71329	Dataset 2	This study
SP22_1543	M1GLobal	sore throat culture swabs	2022	UK	ERR12373851	PRJEB71329	Dataset 2	This study
SP22_1603	M1UK	sore throat culture swabs	2022	UK	ERR12373852	PRJEB71329	Dataset 2	This study
SP22_1613	M1UK	sore throat culture swabs	2022	UK	ERR12373853	PRJEB71329	Dataset 2	This study
SP22_1618	M1UK	sore throat culture swabs	2022	UK	ERR12373854	PRJEB71329	Dataset 2	This study
SP22_1623	M1UK	sore throat culture swabs	2022	UK	ERR12373855	PRJEB71329	Dataset 2	This study
SP22_1625	M1UK	sore throat culture swabs	2022	UK	ERR12373856	PRJEB71329	Dataset 2	This study
SP22_1633	26SNPs	sore throat culture swabs	2022	UK	ERR12373857	PRJEB71329	Dataset 2	This study
SP22_1643	M1UK	sore throat culture swabs	2022	UK	ERR12373858	PRJEB71329	Dataset 2	This study
SP22_1655	M1UK	sore throat culture swabs	2022	UK	ERR12373859	PRJEB71329	Dataset 2	This study
SP22_1659	M1GLobal	sore throat culture swabs	2022	UK	ERR12373860	PRJEB71329	Dataset 2	This study
SP22_1664	M1UK	sore throat culture swabs	2022	UK	ERR12373861	PRJEB71329	Dataset 2	This study
SP22_1665	M1UK	sore throat culture swabs	2022	UK	ERR12373862	PRJEB71329	Dataset 2	This study
SP22_1666	M1UK	sore throat culture swabs	2022	UK	ERR12373863	PRJEB71329	Dataset 2	This study
SP22_1667	M1UK	sore throat culture swabs	2022	UK	ERR12373864	PRJEB71329	Dataset 2	This study
SP22_1671	M1UK	sore throat culture swabs	2022	UK	ERR12373865	PRJEB71329	Dataset 2	This study
SP22_1699	M1UK	sore throat culture swabs	2022	UK	ERR12373866	PRJEB71329	Dataset 2	This study
SP22_1701	M1UK	sore throat culture swabs	2022	UK	ERR12373867	PRJEB71329	Dataset 2	This study
SP22_1715	M1UK	sore throat culture swabs	2022	UK	ERR12373868	PRJEB71329	Dataset 2	This study
SP22_1722	M1UK	sore throat culture swabs	2022	UK	ERR12373869	PRJEB71329	Dataset 2	This study
SP22_1734	M1UK	sore throat culture swabs	2022	UK	ERR12373870	PRJEB71329	Dataset 2	This study
SP22_1737	M1UK	sore throat culture swabs	2022	UK	ERR12373871	PRJEB71329	Dataset 2	This study
SP22_1752	M1UK	sore throat culture swabs	2022	UK	ERR12373872	PRJEB71329	Dataset 2	This study
SP22_1767	M1UK	sore throat culture swabs	2022	UK	ERR12373873	PRJEB71329	Dataset 2	This study
SP22_1770	M1UK	sore throat culture swabs	2022	UK	ERR12373874	PRJEB71329	Dataset 2	This study
SP22_1772	M1UK	sore throat culture swabs	2022	UK	ERR12373875	PRJEB71329	Dataset 2	This study
SP22_1774	M1UK	sore throat culture swabs	2022	UK	ERR12373876	PRJEB71329	Dataset 2	This study
SP22_1776	M1UK	sore throat culture swabs	2022	UK	ERR12373877	PRJEB71329	Dataset 2	This study
SP22_1782	M1GLobal	sore throat culture swabs	2022	UK	ERR12373878	PRJEB71329	Dataset 2	This study
SP22_1788	M1GLobal	sore throat culture swabs	2022	UK	ERR12373879	PRJEB71329	Dataset 2	This study
SP22_1789	M1GLobal	sore throat culture swabs	2022	UK	ERR12373880	PRJEB71329	Dataset 2	This study
SP22_1795	M1UK	sore throat culture swabs	2022	UK	ERR12373881	PRJEB71329	Dataset 2	This study
SP22_1796	M1UK	sore throat culture swabs	2022	UK	ERR12373882	PRJEB71329	Dataset 2	This study
SP22_1803	M1UK	sore throat culture swabs	2022	UK	ERR12373883	PRJEB71329	Dataset 2	This study
SP22_1804	M1UK	sore throat culture swabs	2022	UK	ERR12373884	PRJEB71329	Dataset 2	This study
SP22_1806	26SNPs	sore throat culture swabs	2022	UK	ERR12373885	PRJEB71329	Dataset 2	This study
SP22_1817	M1UK	sore throat culture swabs	2022	UK	ERR12373886	PRJEB71329	Dataset 2	This study
SP22_1818	M1UK	sore throat culture swabs	2022	UK	ERR12373887	PRJEB71329	Dataset 2	This study
SP22_1820	M1UK	sore throat culture swabs	2022	UK	ERR12373888	PRJEB71329	Dataset 2	This study
SP22_1825	M1UK	sore throat culture swabs	2022	UK	ERR12373889	PRJEB71329	Dataset 2	This study
SP22_1828	M1UK	sore throat culture swabs	2022	UK	ERR12373890	PRJEB71329	Dataset 2	This study
SP22_1831	M1UK	sore throat culture swabs	2022	UK	ERR12373891	PRJEB71329	Dataset 2	This study
SP22_1832	M1UK	sore throat culture swabs	2022	UK	ERR12373892	PRJEB71329	Dataset 2	This study
SP22_1836	M1UK	sore throat culture swabs	2022	UK	ERR12373893	PRJEB71329	Dataset 2	This study
SP22_1841	M1UK	sore throat culture swabs	2022	UK	ERR12373894	PRJEB71329	Dataset 2	This study
SP22_1842	M1UK	sore throat culture swabs	2022	UK	ERR12373895	PRJEB71329	Dataset 2	This study
SP22_1849	M1UK	sore throat culture swabs	2022	UK	ERR12373896	PRJEB71329	Dataset 2	This study
SP22_1852	M1UK	sore throat culture swabs	2022	UK	ERR12373897	PRJEB71329	Dataset 2	This study
SP22_1859	M1UK	sore throat culture swabs	2022	UK	ERR12373898	PRJEB71329	Dataset 2	This study
SP22_1866	M1UK	sore throat culture swabs	2022	UK	ERR12373899	PRJEB71329	Dataset 2	This study
SP22_1867	M1UK	sore throat culture swabs	2022	UK	ERR12373900	PRJEB71329	Dataset 2	This study
SP22_1933	M1UK	sore throat culture swabs	2022	UK	ERR12373901	PRJEB71329	Dataset 2	This study
SP22_1935	M1UK	sore throat culture swabs	2022	UK	ERR12373902	PRJEB71329	Dataset 2	This study
SP22_1946	M1UK	sore throat culture swabs	2022	UK	ERR12373903	PRJEB71329	Dataset 2	This study
SP22_1949	M1UK	sore throat culture swabs	2022	UK	ERR12373904	PRJEB71329	Dataset 2	This study
SP22_1952	M1UK	sore throat culture swabs	2022	UK	ERR12373905	PRJEB71329	Dataset 2	This study
SP22_1955	M1UK	sore throat culture swabs	2022	UK	ERR12373906	PRJEB71329	Dataset 2	This study
SP22_1959	M1UK	sore throat culture swabs	2022	UK	ERR12373907	PRJEB71329	Dataset 2	This study
SP22_302	M1UK	sore throat culture swabs	2022	UK	ERR12373908	PRJEB71329	Dataset 2	This study
SP22_412	M1Global	sore throat culture swabs	2022	UK	ERR12373909	PRJEB71329	Dataset 2	This study
SP22_615	M1UK	sore throat culture swabs	2022	UK	ERR12373910	PRJEB71329	Dataset 2	This study
SP22_622	M1UK	sore throat culture swabs	2022	UK	ERR12373911	PRJEB71329	Dataset 2	This study
SP22_624	M1UK	sore throat culture swabs	2022	UK	ERR12373912	PRJEB71329	Dataset 2	This study
SP22_695	M1UK	sore throat culture swabs	2022	UK	ERR12373913	PRJEB71329	Dataset 2	This study
SP22_982	M1Global	sore throat culture swabs	2022	UK	ERR12373914	PRJEB71329	Dataset 2	This study
ERR1515463	13 SNPs	x	2011	UK	ERR1515463	x	Dataset 3	https://www.thelancet.com/journals/laninf/article/PIIS1473-3099(19)30446-3/fulltext
ERR1515483	M1UK	x	2010	UK	ERR1515483	x	Dataset 3	https://www.thelancet.com/journals/laninf/article/PIIS1473-3099(19)30446-3/fulltext
ERR1515541	M1UK	x	2012	UK	ERR1515541	x	Dataset 3	https://www.thelancet.com/journals/laninf/article/PIIS1473-3099(19)30446-3/fulltext
ERR1515562	M1UK	x	2014	UK	ERR1515562	x	Dataset 3	https://www.thelancet.com/journals/laninf/article/PIIS1473-3099(19)30446-3/fulltext
ERR1515613	M1UK	x	2014	UK	ERR1515613	x	Dataset 3	https://www.thelancet.com/journals/laninf/article/PIIS1473-3099(19)30446-3/fulltext
ERR1515622	M1UK	x	2014	UK	ERR1515622	x	Dataset 3	https://www.thelancet.com/journals/laninf/article/PIIS1473-3099(19)30446-3/fulltext
ERR1515869	M1UK	x	2015	UK	ERR1515869	x	Dataset 3	https://www.thelancet.com/journals/laninf/article/PIIS1473-3099(19)30446-3/fulltext
ERR1515872	M1UK	x	2015	UK	ERR1515872	x	Dataset 3	https://www.thelancet.com/journals/laninf/article/PIIS1473-3099(19)30446-3/fulltext
ERR1515946	M1UK	x	2015	UK	ERR1515946	x	Dataset 3	https://www.thelancet.com/journals/laninf/article/PIIS1473-3099(19)30446-3/fulltext
ERR1515952	M1UK	x	2015	UK	ERR1515952	x	Dataset 3	https://www.thelancet.com/journals/laninf/article/PIIS1473-3099(19)30446-3/fulltext
ERR1515962	M1UK	x	2015	UK	ERR1515962	x	Dataset 3	https://www.thelancet.com/journals/laninf/article/PIIS1473-3099(19)30446-3/fulltext
ERR1515967	M1UK	x	2015	UK	ERR1515967	x	Dataset 3	https://www.thelancet.com/journals/laninf/article/PIIS1473-3099(19)30446-3/fulltext
ERR1515979	M1UK	x	2015	UK	ERR1515979	x	Dataset 3	https://www.thelancet.com/journals/laninf/article/PIIS1473-3099(19)30446-3/fulltext
ERR1515980	M1UK	x	2015	UK	ERR1515980	x	Dataset 3	https://www.thelancet.com/journals/laninf/article/PIIS1473-3099(19)30446-3/fulltext
ERR1515982	M1UK	x	2015	UK	ERR1515982	x	Dataset 3	https://www.thelancet.com/journals/laninf/article/PIIS1473-3099(19)30446-3/fulltext
ERR1515991	M1UK	x	2015	UK	ERR1515991	x	Dataset 3	https://www.thelancet.com/journals/laninf/article/PIIS1473-3099(19)30446-3/fulltext
ERR1515994	M1UK	x	2015	UK	ERR1515994	x	Dataset 3	https://www.thelancet.com/journals/laninf/article/PIIS1473-3099(19)30446-3/fulltext
ERR1515996	M1UK	x	2015	UK	ERR1515996	x	Dataset 3	https://www.thelancet.com/journals/laninf/article/PIIS1473-3099(19)30446-3/fulltext
ERR1516009	M1UK	x	2015	UK	ERR1516009	x	Dataset 3	https://www.thelancet.com/journals/laninf/article/PIIS1473-3099(19)30446-3/fulltext
ERR1516014	M1UK	x	2015	UK	ERR1516014	x	Dataset 3	https://www.thelancet.com/journals/laninf/article/PIIS1473-3099(19)30446-3/fulltext
ERR1516026	M1UK	x	2015	UK	ERR1516026	x	Dataset 3	https://www.thelancet.com/journals/laninf/article/PIIS1473-3099(19)30446-3/fulltext
ERR1516027	M1UK	x	2015	UK	ERR1516027	x	Dataset 3	https://www.thelancet.com/journals/laninf/article/PIIS1473-3099(19)30446-3/fulltext
ERR1516037	M1UK	x	2015	UK	ERR1516037	x	Dataset 3	https://www.thelancet.com/journals/laninf/article/PIIS1473-3099(19)30446-3/fulltext
ERR2396418	M1UK	x	2016	UK	ERR2396418	x	Dataset 3	https://www.thelancet.com/journals/laninf/article/PIIS1473-3099(19)30446-3/fulltext
ERR2396420	M1UK	x	2016	UK	ERR2396420	x	Dataset 3	https://www.thelancet.com/journals/laninf/article/PIIS1473-3099(19)30446-3/fulltext
ERR2396421	M1UK	x	2016	UK	ERR2396421	x	Dataset 3	https://www.thelancet.com/journals/laninf/article/PIIS1473-3099(19)30446-3/fulltext
ERR2396422	M1UK	x	2016	UK	ERR2396422	x	Dataset 3	https://www.thelancet.com/journals/laninf/article/PIIS1473-3099(19)30446-3/fulltext
ERR2396423	M1UK	x	2016	UK	ERR2396423	x	Dataset 3	https://www.thelancet.com/journals/laninf/article/PIIS1473-3099(19)30446-3/fulltext
ERR2396424	M1UK	x	2016	UK	ERR2396424	x	Dataset 3	https://www.thelancet.com/journals/laninf/article/PIIS1473-3099(19)30446-3/fulltext
ERR2396425	M1UK	x	2016	UK	ERR2396425	x	Dataset 3	https://www.thelancet.com/journals/laninf/article/PIIS1473-3099(19)30446-3/fulltext
ERR2396426	M1UK	x	2016	UK	ERR2396426	x	Dataset 3	https://www.thelancet.com/journals/laninf/article/PIIS1473-3099(19)30446-3/fulltext
ERR2396427	M1UK	x	2016	UK	ERR2396427	x	Dataset 3	https://www.thelancet.com/journals/laninf/article/PIIS1473-3099(19)30446-3/fulltext
ERR2396428	M1UK	x	2016	UK	ERR2396428	x	Dataset 3	https://www.thelancet.com/journals/laninf/article/PIIS1473-3099(19)30446-3/fulltext
ERR2396430	M1UK	x	2016	UK	ERR2396430	x	Dataset 3	https://www.thelancet.com/journals/laninf/article/PIIS1473-3099(19)30446-3/fulltext
ERR2396434	M1UK	x	2016	UK	ERR2396434	x	Dataset 3	https://www.thelancet.com/journals/laninf/article/PIIS1473-3099(19)30446-3/fulltext
ERR2396436	M1UK	x	2016	UK	ERR2396436	x	Dataset 3	https://www.thelancet.com/journals/laninf/article/PIIS1473-3099(19)30446-3/fulltext
ERR2396443	M1UK	x	2016	UK	ERR2396443	x	Dataset 3	https://www.thelancet.com/journals/laninf/article/PIIS1473-3099(19)30446-3/fulltext
ERR2396445	M1UK	x	2016	UK	ERR2396445	x	Dataset 3	https://www.thelancet.com/journals/laninf/article/PIIS1473-3099(19)30446-3/fulltext
ERR2396447	M1UK	x	2016	UK	ERR2396447	x	Dataset 3	https://www.thelancet.com/journals/laninf/article/PIIS1473-3099(19)30446-3/fulltext
ERR2396448	M1UK	x	2016	UK	ERR2396448	x	Dataset 3	https://www.thelancet.com/journals/laninf/article/PIIS1473-3099(19)30446-3/fulltext
ERR2396450	M1UK	x	2016	UK	ERR2396450	x	Dataset 3	https://www.thelancet.com/journals/laninf/article/PIIS1473-3099(19)30446-3/fulltext
ERR2396451	M1UK	x	2016	UK	ERR2396451	x	Dataset 3	https://www.thelancet.com/journals/laninf/article/PIIS1473-3099(19)30446-3/fulltext
ERR2396453	M1UK	x	2016	UK	ERR2396453	x	Dataset 3	https://www.thelancet.com/journals/laninf/article/PIIS1473-3099(19)30446-3/fulltext
ERR2396454	M1UK	x	2016	UK	ERR2396454	x	Dataset 3	https://www.thelancet.com/journals/laninf/article/PIIS1473-3099(19)30446-3/fulltext
ERR2396455	M1UK	x	2016	UK	ERR2396455	x	Dataset 3	https://www.thelancet.com/journals/laninf/article/PIIS1473-3099(19)30446-3/fulltext
ERR2396456	M1UK	x	2016	UK	ERR2396456	x	Dataset 3	https://www.thelancet.com/journals/laninf/article/PIIS1473-3099(19)30446-3/fulltext
ERR2396457	M1UK	x	2016	UK	ERR2396457	x	Dataset 3	https://www.thelancet.com/journals/laninf/article/PIIS1473-3099(19)30446-3/fulltext
ERR2396458	M1UK	x	2016	UK	ERR2396458	x	Dataset 3	https://www.thelancet.com/journals/laninf/article/PIIS1473-3099(19)30446-3/fulltext
ERR2396459	M1UK	x	2016	UK	ERR2396459	x	Dataset 3	https://www.thelancet.com/journals/laninf/article/PIIS1473-3099(19)30446-3/fulltext
ERR2396461	M1UK	x	2016	UK	ERR2396461	x	Dataset 3	https://www.thelancet.com/journals/laninf/article/PIIS1473-3099(19)30446-3/fulltext
[truncated: 569 more rows]
